# Supplementary material for: Single-cell atlas of dental pulp stem cells exposed to the oral bacteria Porphyromonas gingivalis and Enterococcus faecalis
Source: Front Cell Dev Biol. 2023 May 23;11:1166934. doi: 10.3389/fcell.2023.1166934 (PMC10242116; doi:10.3389/fcell.2023.1166934)
Supplement: Supplementary file 1 [file Table1.XLS]

## Sheet: netpg
	interaction_name	pathway_name	ligand	receptor	agonist	antagonist	co_A_receptor	co_I_receptor	evidence	annotation	interaction_name_2
ligand-Receptor analysis of Sample Pg
TGFB1_TGFBR1_TGFBR2	TGFB1_TGFBR1_TGFBR2	TGFb	TGFB1	TGFbR1_R2	TGFb agonist	TGFb antagonist		TGFb inhibition receptor	KEGG: hsa04350	Secreted Signaling	TGFB1 - (TGFBR1+TGFBR2)
TGFB2_TGFBR1_TGFBR2	TGFB2_TGFBR1_TGFBR2	TGFb	TGFB2	TGFbR1_R2	TGFb agonist	TGFb antagonist		TGFb inhibition receptor	KEGG: hsa04350	Secreted Signaling	TGFB2 - (TGFBR1+TGFBR2)
TGFB3_TGFBR1_TGFBR2	TGFB3_TGFBR1_TGFBR2	TGFb	TGFB3	TGFbR1_R2	TGFb agonist	TGFb antagonist		TGFb inhibition receptor	KEGG: hsa04350	Secreted Signaling	TGFB3 - (TGFBR1+TGFBR2)
TGFB1_ACVR1B_TGFBR2	TGFB1_ACVR1B_TGFBR2	TGFb	TGFB1	ACVR1B_TGFbR2	TGFb agonist	TGFb antagonist		TGFb inhibition receptor	PMID: 27449815	Secreted Signaling	TGFB1 - (ACVR1B+TGFBR2)
TGFB1_ACVR1C_TGFBR2	TGFB1_ACVR1C_TGFBR2	TGFb	TGFB1	ACVR1C_TGFbR2	TGFb agonist	TGFb antagonist		TGFb inhibition receptor	PMID: 27449815	Secreted Signaling	TGFB1 - (ACVR1C+TGFBR2)
TGFB2_ACVR1B_TGFBR2	TGFB2_ACVR1B_TGFBR2	TGFb	TGFB2	ACVR1B_TGFbR2	TGFb agonist	TGFb antagonist		TGFb inhibition receptor	PMID: 27449815	Secreted Signaling	TGFB2 - (ACVR1B+TGFBR2)
TGFB2_ACVR1C_TGFBR2	TGFB2_ACVR1C_TGFBR2	TGFb	TGFB2	ACVR1C_TGFbR2	TGFb agonist	TGFb antagonist		TGFb inhibition receptor	PMID: 27449815	Secreted Signaling	TGFB2 - (ACVR1C+TGFBR2)
TGFB3_ACVR1B_TGFBR2	TGFB3_ACVR1B_TGFBR2	TGFb	TGFB3	ACVR1B_TGFbR2	TGFb agonist	TGFb antagonist		TGFb inhibition receptor	PMID: 27449815	Secreted Signaling	TGFB3 - (ACVR1B+TGFBR2)
TGFB3_ACVR1C_TGFBR2	TGFB3_ACVR1C_TGFBR2	TGFb	TGFB3	ACVR1C_TGFbR2	TGFb agonist	TGFb antagonist		TGFb inhibition receptor	PMID: 27449815	Secreted Signaling	TGFB3 - (ACVR1C+TGFBR2)
TGFB1_ACVR1_TGFBR1	TGFB1_ACVR1_TGFBR1	TGFb	TGFB1	ACVR1_TGFbR					PMID: 29376829	Secreted Signaling	TGFB1 - (ACVR1+TGFBR1)
TGFB2_ACVR1_TGFBR1	TGFB2_ACVR1_TGFBR1	TGFb	TGFB2	ACVR1_TGFbR					PMID: 29376829	Secreted Signaling	TGFB2 - (ACVR1+TGFBR1)
TGFB3_ACVR1_TGFBR1	TGFB3_ACVR1_TGFBR1	TGFb	TGFB3	ACVR1_TGFbR					PMID: 29376829	Secreted Signaling	TGFB3 - (ACVR1+TGFBR1)
BMP2_BMPR1A_ACVR2A	BMP2_BMPR1A_ACVR2A	BMP	BMP2	BMPR1A_ACVR2A		BMP antagonist		BMP inhibition receptor	KEGG: hsa04350; PMID:26893264	Secreted Signaling	BMP2 - (BMPR1A+ACVR2A)
BMP2_BMPR1A_ACVR2B	BMP2_BMPR1A_ACVR2B	BMP	BMP2	BMPR1A_ACVR2B		BMP antagonist		BMP inhibition receptor	KEGG: hsa04350; PMID:26893264	Secreted Signaling	BMP2 - (BMPR1A+ACVR2B)
BMP2_BMPR1A_BMPR2	BMP2_BMPR1A_BMPR2	BMP	BMP2	BMPR1A_BMPR2		BMP antagonist		BMP inhibition receptor	KEGG: hsa04350; PMID:26893264	Secreted Signaling	BMP2 - (BMPR1A+BMPR2)
BMP2_BMPR1B_ACVR2A	BMP2_BMPR1B_ACVR2A	BMP	BMP2	BMPR1B_ACVR2A		BMP antagonist		BMP inhibition receptor	KEGG: hsa04350; PMID:26893264	Secreted Signaling	BMP2 - (BMPR1B+ACVR2A)
BMP2_BMPR1B_ACVR2B	BMP2_BMPR1B_ACVR2B	BMP	BMP2	BMPR1B_ACVR2B		BMP antagonist		BMP inhibition receptor	KEGG: hsa04350; PMID:26893264	Secreted Signaling	BMP2 - (BMPR1B+ACVR2B)
BMP2_BMPR1B_BMPR2	BMP2_BMPR1B_BMPR2	BMP	BMP2	BMPR1B_BMPR2		BMP antagonist		BMP inhibition receptor	KEGG: hsa04350; PMID:26893264	Secreted Signaling	BMP2 - (BMPR1B+BMPR2)
BMP4_BMPR1A_ACVR2A	BMP4_BMPR1A_ACVR2A	BMP	BMP4	BMPR1A_ACVR2A		BMP antagonist		BMP inhibition receptor	KEGG: hsa04350; PMID:26893264	Secreted Signaling	BMP4 - (BMPR1A+ACVR2A)
BMP4_BMPR1A_ACVR2B	BMP4_BMPR1A_ACVR2B	BMP	BMP4	BMPR1A_ACVR2B		BMP antagonist		BMP inhibition receptor	KEGG: hsa04350; PMID:26893264	Secreted Signaling	BMP4 - (BMPR1A+ACVR2B)
BMP4_BMPR1A_BMPR2	BMP4_BMPR1A_BMPR2	BMP	BMP4	BMPR1A_BMPR2		BMP antagonist		BMP inhibition receptor	KEGG: hsa04350; PMID:26893264	Secreted Signaling	BMP4 - (BMPR1A+BMPR2)
BMP4_BMPR1B_ACVR2A	BMP4_BMPR1B_ACVR2A	BMP	BMP4	BMPR1B_ACVR2A		BMP antagonist		BMP inhibition receptor	KEGG: hsa04350; PMID:26893264	Secreted Signaling	BMP4 - (BMPR1B+ACVR2A)
BMP4_BMPR1B_ACVR2B	BMP4_BMPR1B_ACVR2B	BMP	BMP4	BMPR1B_ACVR2B		BMP antagonist		BMP inhibition receptor	KEGG: hsa04350; PMID:26893264	Secreted Signaling	BMP4 - (BMPR1B+ACVR2B)
BMP4_BMPR1B_BMPR2	BMP4_BMPR1B_BMPR2	BMP	BMP4	BMPR1B_BMPR2		BMP antagonist		BMP inhibition receptor	KEGG: hsa04350; PMID:26893264	Secreted Signaling	BMP4 - (BMPR1B+BMPR2)
GDF5_BMPR1A_ACVR2A	GDF5_BMPR1A_ACVR2A	BMP	GDF5	BMPR1A_ACVR2A		BMP antagonist		BMP inhibition receptor	KEGG: hsa04350; PMID:26893264	Secreted Signaling	GDF5 - (BMPR1A+ACVR2A)
GDF5_BMPR1A_ACVR2B	GDF5_BMPR1A_ACVR2B	BMP	GDF5	BMPR1A_ACVR2B		BMP antagonist		BMP inhibition receptor	KEGG: hsa04350; PMID:26893264	Secreted Signaling	GDF5 - (BMPR1A+ACVR2B)
GDF5_BMPR1A_BMPR2	GDF5_BMPR1A_BMPR2	BMP	GDF5	BMPR1A_BMPR2		BMP antagonist		BMP inhibition receptor	KEGG: hsa04350; PMID:26893264	Secreted Signaling	GDF5 - (BMPR1A+BMPR2)
GDF5_BMPR1B_ACVR2A	GDF5_BMPR1B_ACVR2A	BMP	GDF5	BMPR1B_ACVR2A		BMP antagonist		BMP inhibition receptor	KEGG: hsa04350; PMID:26893264	Secreted Signaling	GDF5 - (BMPR1B+ACVR2A)
GDF5_BMPR1B_ACVR2B	GDF5_BMPR1B_ACVR2B	BMP	GDF5	BMPR1B_ACVR2B		BMP antagonist		BMP inhibition receptor	KEGG: hsa04350; PMID:26893264	Secreted Signaling	GDF5 - (BMPR1B+ACVR2B)
GDF5_BMPR1B_BMPR2	GDF5_BMPR1B_BMPR2	BMP	GDF5	BMPR1B_BMPR2		BMP antagonist		BMP inhibition receptor	KEGG: hsa04350; PMID:26893264	Secreted Signaling	GDF5 - (BMPR1B+BMPR2)
GDF6_BMPR1A_ACVR2A	GDF6_BMPR1A_ACVR2A	BMP	GDF6	BMPR1A_ACVR2A		BMP antagonist		BMP inhibition receptor	KEGG: hsa04350; PMID:26893264	Secreted Signaling	GDF6 - (BMPR1A+ACVR2A)
GDF6_BMPR1A_ACVR2B	GDF6_BMPR1A_ACVR2B	BMP	GDF6	BMPR1A_ACVR2B		BMP antagonist		BMP inhibition receptor	KEGG: hsa04350; PMID:26893264	Secreted Signaling	GDF6 - (BMPR1A+ACVR2B)
GDF6_BMPR1A_BMPR2	GDF6_BMPR1A_BMPR2	BMP	GDF6	BMPR1A_BMPR2		BMP antagonist		BMP inhibition receptor	KEGG: hsa04350; PMID:26893264	Secreted Signaling	GDF6 - (BMPR1A+BMPR2)
GDF6_BMPR1B_ACVR2A	GDF6_BMPR1B_ACVR2A	BMP	GDF6	BMPR1B_ACVR2A		BMP antagonist		BMP inhibition receptor	KEGG: hsa04350; PMID:26893264	Secreted Signaling	GDF6 - (BMPR1B+ACVR2A)
GDF6_BMPR1B_ACVR2B	GDF6_BMPR1B_ACVR2B	BMP	GDF6	BMPR1B_ACVR2B		BMP antagonist		BMP inhibition receptor	KEGG: hsa04350; PMID:26893264	Secreted Signaling	GDF6 - (BMPR1B+ACVR2B)
GDF6_BMPR1B_BMPR2	GDF6_BMPR1B_BMPR2	BMP	GDF6	BMPR1B_BMPR2		BMP antagonist		BMP inhibition receptor	KEGG: hsa04350; PMID:26893264	Secreted Signaling	GDF6 - (BMPR1B+BMPR2)
GDF7_BMPR1A_ACVR2A	GDF7_BMPR1A_ACVR2A	BMP	GDF7	BMPR1A_ACVR2A		BMP antagonist		BMP inhibition receptor	KEGG: hsa04350; PMID:26893264	Secreted Signaling	GDF7 - (BMPR1A+ACVR2A)
GDF7_BMPR1A_ACVR2B	GDF7_BMPR1A_ACVR2B	BMP	GDF7	BMPR1A_ACVR2B		BMP antagonist		BMP inhibition receptor	KEGG: hsa04350; PMID:26893264	Secreted Signaling	GDF7 - (BMPR1A+ACVR2B)
GDF7_BMPR1A_BMPR2	GDF7_BMPR1A_BMPR2	BMP	GDF7	BMPR1A_BMPR2		BMP antagonist		BMP inhibition receptor	KEGG: hsa04350; PMID:26893264	Secreted Signaling	GDF7 - (BMPR1A+BMPR2)
GDF7_BMPR1B_ACVR2A	GDF7_BMPR1B_ACVR2A	BMP	GDF7	BMPR1B_ACVR2A		BMP antagonist		BMP inhibition receptor	KEGG: hsa04350; PMID:26893264	Secreted Signaling	GDF7 - (BMPR1B+ACVR2A)
GDF7_BMPR1B_ACVR2B	GDF7_BMPR1B_ACVR2B	BMP	GDF7	BMPR1B_ACVR2B		BMP antagonist		BMP inhibition receptor	KEGG: hsa04350; PMID:26893264	Secreted Signaling	GDF7 - (BMPR1B+ACVR2B)
GDF7_BMPR1B_BMPR2	GDF7_BMPR1B_BMPR2	BMP	GDF7	BMPR1B_BMPR2		BMP antagonist		BMP inhibition receptor	KEGG: hsa04350; PMID:26893264	Secreted Signaling	GDF7 - (BMPR1B+BMPR2)
BMP6_ACVR1_ACVR2A	BMP6_ACVR1_ACVR2A	BMP	BMP6	ACVR1_ACVR2A		BMP antagonist		BMP inhibition receptor	KEGG: hsa04350; PMID:26893264	Secreted Signaling	BMP6 - (ACVR1+ACVR2A)
BMP6_ACVR1_ACVR2B	BMP6_ACVR1_ACVR2B	BMP	BMP6	ACVR1_ACVR2B		BMP antagonist		BMP inhibition receptor	KEGG: hsa04350; PMID:26893264	Secreted Signaling	BMP6 - (ACVR1+ACVR2B)
BMP6_ACVR1_BMPR2	BMP6_ACVR1_BMPR2	BMP	BMP6	ACVR1_BMPR2		BMP antagonist		BMP inhibition receptor	KEGG: hsa04350; PMID:26893264	Secreted Signaling	BMP6 - (ACVR1+BMPR2)
BMP6_BMPR1A_ACVR2A	BMP6_BMPR1A_ACVR2A	BMP	BMP6	BMPR1A_ACVR2A		BMP antagonist		BMP inhibition receptor	KEGG: hsa04350; PMID:26893264	Secreted Signaling	BMP6 - (BMPR1A+ACVR2A)
BMP6_BMPR1A_ACVR2B	BMP6_BMPR1A_ACVR2B	BMP	BMP6	BMPR1A_ACVR2B		BMP antagonist		BMP inhibition receptor	KEGG: hsa04350; PMID:26893264	Secreted Signaling	BMP6 - (BMPR1A+ACVR2B)
BMP6_BMPR1A_BMPR2	BMP6_BMPR1A_BMPR2	BMP	BMP6	BMPR1A_BMPR2		BMP antagonist		BMP inhibition receptor	KEGG: hsa04350; PMID:26893264	Secreted Signaling	BMP6 - (BMPR1A+BMPR2)
BMP6_BMPR1B_ACVR2A	BMP6_BMPR1B_ACVR2A	BMP	BMP6	BMPR1B_ACVR2A		BMP antagonist		BMP inhibition receptor	KEGG: hsa04350; PMID:26893264	Secreted Signaling	BMP6 - (BMPR1B+ACVR2A)
BMP6_BMPR1B_ACVR2B	BMP6_BMPR1B_ACVR2B	BMP	BMP6	BMPR1B_ACVR2B		BMP antagonist		BMP inhibition receptor	KEGG: hsa04350; PMID:26893264	Secreted Signaling	BMP6 - (BMPR1B+ACVR2B)
BMP6_BMPR1B_BMPR2	BMP6_BMPR1B_BMPR2	BMP	BMP6	BMPR1B_BMPR2		BMP antagonist		BMP inhibition receptor	KEGG: hsa04350; PMID:26893264	Secreted Signaling	BMP6 - (BMPR1B+BMPR2)
BMP8A_ACVR1_ACVR2A	BMP8A_ACVR1_ACVR2A	BMP	BMP8A	ACVR1_ACVR2A		BMP antagonist		BMP inhibition receptor	KEGG: hsa04350; PMID:26893264	Secreted Signaling	BMP8A - (ACVR1+ACVR2A)
BMP8A_ACVR1_ACVR2B	BMP8A_ACVR1_ACVR2B	BMP	BMP8A	ACVR1_ACVR2B		BMP antagonist		BMP inhibition receptor	KEGG: hsa04350; PMID:26893264	Secreted Signaling	BMP8A - (ACVR1+ACVR2B)
BMP8A_ACVR1_BMPR2	BMP8A_ACVR1_BMPR2	BMP	BMP8A	ACVR1_BMPR2		BMP antagonist		BMP inhibition receptor	KEGG: hsa04350; PMID:26893264	Secreted Signaling	BMP8A - (ACVR1+BMPR2)
BMP8A_BMPR1A_ACVR2A	BMP8A_BMPR1A_ACVR2A	BMP	BMP8A	BMPR1A_ACVR2A		BMP antagonist		BMP inhibition receptor	KEGG: hsa04350; PMID:26893264	Secreted Signaling	BMP8A - (BMPR1A+ACVR2A)
BMP8A_BMPR1A_ACVR2B	BMP8A_BMPR1A_ACVR2B	BMP	BMP8A	BMPR1A_ACVR2B		BMP antagonist		BMP inhibition receptor	KEGG: hsa04350; PMID:26893264	Secreted Signaling	BMP8A - (BMPR1A+ACVR2B)
BMP8A_BMPR1A_BMPR2	BMP8A_BMPR1A_BMPR2	BMP	BMP8A	BMPR1A_BMPR2		BMP antagonist		BMP inhibition receptor	KEGG: hsa04350; PMID:26893264	Secreted Signaling	BMP8A - (BMPR1A+BMPR2)
BMP8A_BMPR1B_ACVR2A	BMP8A_BMPR1B_ACVR2A	BMP	BMP8A	BMPR1B_ACVR2A		BMP antagonist		BMP inhibition receptor	KEGG: hsa04350; PMID:26893264	Secreted Signaling	BMP8A - (BMPR1B+ACVR2A)
BMP8A_BMPR1B_ACVR2B	BMP8A_BMPR1B_ACVR2B	BMP	BMP8A	BMPR1B_ACVR2B		BMP antagonist		BMP inhibition receptor	KEGG: hsa04350; PMID:26893264	Secreted Signaling	BMP8A - (BMPR1B+ACVR2B)
BMP8A_BMPR1B_BMPR2	BMP8A_BMPR1B_BMPR2	BMP	BMP8A	BMPR1B_BMPR2		BMP antagonist		BMP inhibition receptor	KEGG: hsa04350; PMID:26893264	Secreted Signaling	BMP8A - (BMPR1B+BMPR2)
BMP8B_ACVR1_ACVR2A	BMP8B_ACVR1_ACVR2A	BMP	BMP8B	ACVR1_ACVR2A		BMP antagonist		BMP inhibition receptor	KEGG: hsa04350; PMID:26893264	Secreted Signaling	BMP8B - (ACVR1+ACVR2A)
BMP8B_ACVR1_ACVR2B	BMP8B_ACVR1_ACVR2B	BMP	BMP8B	ACVR1_ACVR2B		BMP antagonist		BMP inhibition receptor	KEGG: hsa04350; PMID:26893264	Secreted Signaling	BMP8B - (ACVR1+ACVR2B)
BMP8B_ACVR1_BMPR2	BMP8B_ACVR1_BMPR2	BMP	BMP8B	ACVR1_BMPR2		BMP antagonist		BMP inhibition receptor	KEGG: hsa04350; PMID:26893264	Secreted Signaling	BMP8B - (ACVR1+BMPR2)
BMP8B_BMPR1A_ACVR2A	BMP8B_BMPR1A_ACVR2A	BMP	BMP8B	BMPR1A_ACVR2A		BMP antagonist		BMP inhibition receptor	KEGG: hsa04350; PMID:26893264	Secreted Signaling	BMP8B - (BMPR1A+ACVR2A)
BMP8B_BMPR1A_ACVR2B	BMP8B_BMPR1A_ACVR2B	BMP	BMP8B	BMPR1A_ACVR2B		BMP antagonist		BMP inhibition receptor	KEGG: hsa04350; PMID:26893264	Secreted Signaling	BMP8B - (BMPR1A+ACVR2B)
BMP8B_BMPR1A_BMPR2	BMP8B_BMPR1A_BMPR2	BMP	BMP8B	BMPR1A_BMPR2		BMP antagonist		BMP inhibition receptor	KEGG: hsa04350; PMID:26893264	Secreted Signaling	BMP8B - (BMPR1A+BMPR2)
BMP8B_BMPR1B_ACVR2A	BMP8B_BMPR1B_ACVR2A	BMP	BMP8B	BMPR1B_ACVR2A		BMP antagonist		BMP inhibition receptor	KEGG: hsa04350; PMID:26893264	Secreted Signaling	BMP8B - (BMPR1B+ACVR2A)
BMP8B_BMPR1B_ACVR2B	BMP8B_BMPR1B_ACVR2B	BMP	BMP8B	BMPR1B_ACVR2B		BMP antagonist		BMP inhibition receptor	KEGG: hsa04350; PMID:26893264	Secreted Signaling	BMP8B - (BMPR1B+ACVR2B)
BMP8B_BMPR1B_BMPR2	BMP8B_BMPR1B_BMPR2	BMP	BMP8B	BMPR1B_BMPR2		BMP antagonist		BMP inhibition receptor	KEGG: hsa04350; PMID:26893264	Secreted Signaling	BMP8B - (BMPR1B+BMPR2)
GDF9_ACVR1B_BMPR2	GDF9_ACVR1B_BMPR2	GDF	GDF9	ACVR1B_BMPR2					KEGG: hsa04350	Secreted Signaling	GDF9 - (ACVR1B+BMPR2)
GDF11_TGFBR1_ACVR2A	GDF11_TGFBR1_ACVR2A	GDF	GDF11	TGFBR1_ACVR2A					KEGG: hsa04350	Secreted Signaling	GDF11 - (TGFBR1+ACVR2A)
GDF11_TGFBR1_ACVR2B	GDF11_TGFBR1_ACVR2B	GDF	GDF11	TGFBR1_ACVR2B					KEGG: hsa04350	Secreted Signaling	GDF11 - (TGFBR1+ACVR2B)
GDF11_ACVR1B_ACVR2B	GDF11_ACVR1B_ACVR2B	GDF	GDF11	ACVR1B_ACVR2B					KEGG: hsa04350	Secreted Signaling	GDF11 - (ACVR1B+ACVR2B)
GDF15_TGFBR2	GDF15_TGFBR2	GDF	GDF15	TGFBR2					KEGG: hsa04350	Secreted Signaling	GDF15 - TGFBR2
MSTN_TGFBR1_ACVR2B	MSTN_TGFBR1_ACVR2B	MSTN	MSTN	TGFBR1_ACVR2B					KEGG: hsa04060	Secreted Signaling	MSTN - (TGFBR1+ACVR2B)
MSTN_ACVR1B_ACVR2B	MSTN_ACVR1B_ACVR2B	MSTN	MSTN	ACVR1B_ACVR2B					KEGG: hsa04060	Secreted Signaling	MSTN - (ACVR1B+ACVR2B)
MSTN_ACVR1B_ACVR2A	MSTN_ACVR1B_ACVR2A	MSTN	MSTN	ACVR1B_ACVR2A					KEGG: hsa04060	Secreted Signaling	MSTN - (ACVR1B+ACVR2A)
MSTN_TGFBR1_ACVR2A	MSTN_TGFBR1_ACVR2A	MSTN	MSTN	TGFBR1_ACVR2A					KEGG: hsa04060	Secreted Signaling	MSTN - (TGFBR1+ACVR2A)
GDNF_GFRA1	GDNF_GFRA1	GDNF	GDNF	GFRA1_RET					PMID: 11544105	Secreted Signaling	GDNF - GFRA1
ARTN_GFRA1	ARTN_GFRA1	GDNF	ARTN	GFRA1_RET					PMID: 11544109	Secreted Signaling	ARTN - GFRA1
INHBA_ACVR1B_ACVR2A	INHBA_ACVR1B_ACVR2A	ACTIVIN	INHBA	ACVR1B_ACVR2A		ACTIVIN antagonist		ACTIVIN inhibition receptor	KEGG: hsa04350	Secreted Signaling	INHBA - (ACVR1B+ACVR2A)
INHBA_ACVR1B_ACVR2B	INHBA_ACVR1B_ACVR2B	ACTIVIN	INHBA	ACVR1B_ACVR2B		ACTIVIN antagonist		ACTIVIN inhibition receptor	KEGG: hsa04351	Secreted Signaling	INHBA - (ACVR1B+ACVR2B)
INHBB_ACVR1B_ACVR2A	INHBB_ACVR1B_ACVR2A	ACTIVIN	INHBB	ACVR1B_ACVR2A		ACTIVIN antagonist		ACTIVIN inhibition receptor	KEGG: hsa04352	Secreted Signaling	INHBB - (ACVR1B+ACVR2A)
INHBB_ACVR1B_ACVR2B	INHBB_ACVR1B_ACVR2B	ACTIVIN	INHBB	ACVR1B_ACVR2B		ACTIVIN antagonist		ACTIVIN inhibition receptor	KEGG: hsa04353	Secreted Signaling	INHBB - (ACVR1B+ACVR2B)
INHBB_ACVR1C_ACVR2A	INHBB_ACVR1C_ACVR2A	ACTIVIN	INHBB	ACVR1C_ACVR2A		ACTIVIN antagonist		ACTIVIN inhibition receptor	KEGG: hsa04354	Secreted Signaling	INHBB - (ACVR1C+ACVR2A)
INHBB_ACVR1C_ACVR2B	INHBB_ACVR1C_ACVR2B	ACTIVIN	INHBB	ACVR1C_ACVR2B		ACTIVIN antagonist		ACTIVIN inhibition receptor	KEGG: hsa04355	Secreted Signaling	INHBB - (ACVR1C+ACVR2B)
INHBABB_ACVR1B_ACVR2A	INHBABB_ACVR1B_ACVR2A	ACTIVIN	Activin AB	ACVR1B_ACVR2A		ACTIVIN antagonist		ACTIVIN inhibition receptor	PMID: 2457849; PMID: 22991378	Secreted Signaling	INHBABB - (ACVR1B+ACVR2A)
INHBABB_ACVR1B_ACVR2B	INHBABB_ACVR1B_ACVR2B	ACTIVIN	Activin AB	ACVR1B_ACVR2B		ACTIVIN antagonist		ACTIVIN inhibition receptor	PMID: 2457849; PMID: 22991378	Secreted Signaling	INHBABB - (ACVR1B+ACVR2B)
INHBABB_ACVR1C_ACVR2A	INHBABB_ACVR1C_ACVR2A	ACTIVIN	Activin AB	ACVR1C_ACVR2A		ACTIVIN antagonist		ACTIVIN inhibition receptor	PMID: 2457849; PMID: 22991378	Secreted Signaling	INHBABB - (ACVR1C+ACVR2A)
INHB_ACVR1C_ACVR2B	INHB_ACVR1C_ACVR2B	ACTIVIN	Activin AB	ACVR1C_ACVR2B		ACTIVIN antagonist		ACTIVIN inhibition receptor	PMID: 2457849; PMID: 22991378	Secreted Signaling	INHB - (ACVR1C+ACVR2B)
INHABA_ACVR2A	INHABA_ACVR2A	ACTIVIN	Inhibin A	ACVR2A		ACTIVIN antagonist		ACTIVIN inhibition receptor	PMID: 15027884	Secreted Signaling	INHABA - ACVR2A
INHABB_ACVR2B	INHABB_ACVR2B	ACTIVIN	Inhibin B	ACVR2B		ACTIVIN antagonist		ACTIVIN inhibition receptor	PMID: 15027884	Secreted Signaling	INHABB - ACVR2B
WNT10B_FZD1_LRP5	WNT10B_FZD1_LRP5	WNT	WNT10B	FZD1_LRP5	WNT agonist	WNT antagonist	WNT activation receptor	WNT inhibition receptor	KEGG: hsa04310; PMID: 23209147	Secreted Signaling	WNT10B - (FZD1+LRP5)
WNT10B_FZD2_LRP5	WNT10B_FZD2_LRP5	WNT	WNT10B	FZD2_LRP5	WNT agonist	WNT antagonist	WNT activation receptor	WNT inhibition receptor	KEGG: hsa04310; PMID: 23209147	Secreted Signaling	WNT10B - (FZD2+LRP5)
WNT10B_FZD3_LRP5	WNT10B_FZD3_LRP5	WNT	WNT10B	FZD3_LRP5	WNT agonist	WNT antagonist	WNT activation receptor	WNT inhibition receptor	KEGG: hsa04310; PMID: 23209147	Secreted Signaling	WNT10B - (FZD3+LRP5)
WNT10B_FZD4_LRP5	WNT10B_FZD4_LRP5	WNT	WNT10B	FZD4_LRP5	WNT agonist	WNT antagonist	WNT activation receptor	WNT inhibition receptor	KEGG: hsa04310; PMID: 23209147	Secreted Signaling	WNT10B - (FZD4+LRP5)
WNT10B_FZD5_LRP5	WNT10B_FZD5_LRP5	WNT	WNT10B	FZD5_LRP5	WNT agonist	WNT antagonist	WNT activation receptor	WNT inhibition receptor	KEGG: hsa04310; PMID: 23209147	Secreted Signaling	WNT10B - (FZD5+LRP5)
WNT10B_FZD6_LRP5	WNT10B_FZD6_LRP5	WNT	WNT10B	FZD6_LRP5	WNT agonist	WNT antagonist	WNT activation receptor	WNT inhibition receptor	KEGG: hsa04310; PMID: 23209147	Secreted Signaling	WNT10B - (FZD6+LRP5)
WNT10B_FZD7_LRP5	WNT10B_FZD7_LRP5	WNT	WNT10B	FZD7_LRP5	WNT agonist	WNT antagonist	WNT activation receptor	WNT inhibition receptor	KEGG: hsa04310; PMID: 23209147	Secreted Signaling	WNT10B - (FZD7+LRP5)
WNT10B_FZD8_LRP5	WNT10B_FZD8_LRP5	WNT	WNT10B	FZD8_LRP5	WNT agonist	WNT antagonist	WNT activation receptor	WNT inhibition receptor	KEGG: hsa04310; PMID: 23209147	Secreted Signaling	WNT10B - (FZD8+LRP5)
WNT10B_FZD9_LRP5	WNT10B_FZD9_LRP5	WNT	WNT10B	FZD9_LRP5	WNT agonist	WNT antagonist	WNT activation receptor	WNT inhibition receptor	KEGG: hsa04310; PMID: 23209147	Secreted Signaling	WNT10B - (FZD9+LRP5)
WNT16_FZD1_LRP5	WNT16_FZD1_LRP5	WNT	WNT16	FZD1_LRP5	WNT agonist	WNT antagonist	WNT activation receptor	WNT inhibition receptor	KEGG: hsa04310; PMID: 23209147	Secreted Signaling	WNT16 - (FZD1+LRP5)
WNT16_FZD2_LRP5	WNT16_FZD2_LRP5	WNT	WNT16	FZD2_LRP5	WNT agonist	WNT antagonist	WNT activation receptor	WNT inhibition receptor	KEGG: hsa04310; PMID: 23209147	Secreted Signaling	WNT16 - (FZD2+LRP5)
WNT16_FZD3_LRP5	WNT16_FZD3_LRP5	WNT	WNT16	FZD3_LRP5	WNT agonist	WNT antagonist	WNT activation receptor	WNT inhibition receptor	KEGG: hsa04310; PMID: 23209147	Secreted Signaling	WNT16 - (FZD3+LRP5)
WNT16_FZD4_LRP5	WNT16_FZD4_LRP5	WNT	WNT16	FZD4_LRP5	WNT agonist	WNT antagonist	WNT activation receptor	WNT inhibition receptor	KEGG: hsa04310; PMID: 23209147	Secreted Signaling	WNT16 - (FZD4+LRP5)
WNT16_FZD5_LRP5	WNT16_FZD5_LRP5	WNT	WNT16	FZD5_LRP5	WNT agonist	WNT antagonist	WNT activation receptor	WNT inhibition receptor	KEGG: hsa04310; PMID: 23209147	Secreted Signaling	WNT16 - (FZD5+LRP5)
WNT16_FZD6_LRP5	WNT16_FZD6_LRP5	WNT	WNT16	FZD6_LRP5	WNT agonist	WNT antagonist	WNT activation receptor	WNT inhibition receptor	KEGG: hsa04310; PMID: 23209147	Secreted Signaling	WNT16 - (FZD6+LRP5)
WNT16_FZD7_LRP5	WNT16_FZD7_LRP5	WNT	WNT16	FZD7_LRP5	WNT agonist	WNT antagonist	WNT activation receptor	WNT inhibition receptor	KEGG: hsa04310; PMID: 23209147	Secreted Signaling	WNT16 - (FZD7+LRP5)
WNT16_FZD8_LRP5	WNT16_FZD8_LRP5	WNT	WNT16	FZD8_LRP5	WNT agonist	WNT antagonist	WNT activation receptor	WNT inhibition receptor	KEGG: hsa04310; PMID: 23209147	Secreted Signaling	WNT16 - (FZD8+LRP5)
WNT16_FZD9_LRP5	WNT16_FZD9_LRP5	WNT	WNT16	FZD9_LRP5	WNT agonist	WNT antagonist	WNT activation receptor	WNT inhibition receptor	KEGG: hsa04310; PMID: 23209147	Secreted Signaling	WNT16 - (FZD9+LRP5)
WNT2_FZD1_LRP5	WNT2_FZD1_LRP5	WNT	WNT2	FZD1_LRP5	WNT agonist	WNT antagonist	WNT activation receptor	WNT inhibition receptor	KEGG: hsa04310; PMID: 23209147	Secreted Signaling	WNT2 - (FZD1+LRP5)
WNT2_FZD2_LRP5	WNT2_FZD2_LRP5	WNT	WNT2	FZD2_LRP5	WNT agonist	WNT antagonist	WNT activation receptor	WNT inhibition receptor	KEGG: hsa04310; PMID: 23209147	Secreted Signaling	WNT2 - (FZD2+LRP5)
WNT2_FZD3_LRP5	WNT2_FZD3_LRP5	WNT	WNT2	FZD3_LRP5	WNT agonist	WNT antagonist	WNT activation receptor	WNT inhibition receptor	KEGG: hsa04310; PMID: 23209147	Secreted Signaling	WNT2 - (FZD3+LRP5)
WNT2_FZD4_LRP5	WNT2_FZD4_LRP5	WNT	WNT2	FZD4_LRP5	WNT agonist	WNT antagonist	WNT activation receptor	WNT inhibition receptor	KEGG: hsa04310; PMID: 23209147	Secreted Signaling	WNT2 - (FZD4+LRP5)
WNT2_FZD5_LRP5	WNT2_FZD5_LRP5	WNT	WNT2	FZD5_LRP5	WNT agonist	WNT antagonist	WNT activation receptor	WNT inhibition receptor	KEGG: hsa04310; PMID: 23209147	Secreted Signaling	WNT2 - (FZD5+LRP5)
WNT2_FZD6_LRP5	WNT2_FZD6_LRP5	WNT	WNT2	FZD6_LRP5	WNT agonist	WNT antagonist	WNT activation receptor	WNT inhibition receptor	KEGG: hsa04310; PMID: 23209147	Secreted Signaling	WNT2 - (FZD6+LRP5)
WNT2_FZD7_LRP5	WNT2_FZD7_LRP5	WNT	WNT2	FZD7_LRP5	WNT agonist	WNT antagonist	WNT activation receptor	WNT inhibition receptor	KEGG: hsa04310; PMID: 23209147	Secreted Signaling	WNT2 - (FZD7+LRP5)
WNT2_FZD8_LRP5	WNT2_FZD8_LRP5	WNT	WNT2	FZD8_LRP5	WNT agonist	WNT antagonist	WNT activation receptor	WNT inhibition receptor	KEGG: hsa04310; PMID: 23209147	Secreted Signaling	WNT2 - (FZD8+LRP5)
WNT2_FZD9_LRP5	WNT2_FZD9_LRP5	WNT	WNT2	FZD9_LRP5	WNT agonist	WNT antagonist	WNT activation receptor	WNT inhibition receptor	KEGG: hsa04310; PMID: 23209147	Secreted Signaling	WNT2 - (FZD9+LRP5)
WNT2B_FZD1_LRP5	WNT2B_FZD1_LRP5	WNT	WNT2B	FZD1_LRP5	WNT agonist	WNT antagonist	WNT activation receptor	WNT inhibition receptor	KEGG: hsa04310; PMID: 23209147	Secreted Signaling	WNT2B - (FZD1+LRP5)
WNT2B_FZD2_LRP5	WNT2B_FZD2_LRP5	WNT	WNT2B	FZD2_LRP5	WNT agonist	WNT antagonist	WNT activation receptor	WNT inhibition receptor	KEGG: hsa04310; PMID: 23209147	Secreted Signaling	WNT2B - (FZD2+LRP5)
WNT2B_FZD3_LRP5	WNT2B_FZD3_LRP5	WNT	WNT2B	FZD3_LRP5	WNT agonist	WNT antagonist	WNT activation receptor	WNT inhibition receptor	KEGG: hsa04310; PMID: 23209147	Secreted Signaling	WNT2B - (FZD3+LRP5)
WNT2B_FZD4_LRP5	WNT2B_FZD4_LRP5	WNT	WNT2B	FZD4_LRP5	WNT agonist	WNT antagonist	WNT activation receptor	WNT inhibition receptor	KEGG: hsa04310; PMID: 23209147	Secreted Signaling	WNT2B - (FZD4+LRP5)
WNT2B_FZD5_LRP5	WNT2B_FZD5_LRP5	WNT	WNT2B	FZD5_LRP5	WNT agonist	WNT antagonist	WNT activation receptor	WNT inhibition receptor	KEGG: hsa04310; PMID: 23209147	Secreted Signaling	WNT2B - (FZD5+LRP5)
WNT2B_FZD6_LRP5	WNT2B_FZD6_LRP5	WNT	WNT2B	FZD6_LRP5	WNT agonist	WNT antagonist	WNT activation receptor	WNT inhibition receptor	KEGG: hsa04310; PMID: 23209147	Secreted Signaling	WNT2B - (FZD6+LRP5)
WNT2B_FZD7_LRP5	WNT2B_FZD7_LRP5	WNT	WNT2B	FZD7_LRP5	WNT agonist	WNT antagonist	WNT activation receptor	WNT inhibition receptor	KEGG: hsa04310; PMID: 23209147	Secreted Signaling	WNT2B - (FZD7+LRP5)
WNT2B_FZD8_LRP5	WNT2B_FZD8_LRP5	WNT	WNT2B	FZD8_LRP5	WNT agonist	WNT antagonist	WNT activation receptor	WNT inhibition receptor	KEGG: hsa04310; PMID: 23209147	Secreted Signaling	WNT2B - (FZD8+LRP5)
WNT2B_FZD9_LRP5	WNT2B_FZD9_LRP5	WNT	WNT2B	FZD9_LRP5	WNT agonist	WNT antagonist	WNT activation receptor	WNT inhibition receptor	KEGG: hsa04310; PMID: 23209147	Secreted Signaling	WNT2B - (FZD9+LRP5)
WNT3_FZD1_LRP5	WNT3_FZD1_LRP5	WNT	WNT3	FZD1_LRP5	WNT agonist	WNT antagonist	WNT activation receptor	WNT inhibition receptor	KEGG: hsa04310; PMID: 23209147	Secreted Signaling	WNT3 - (FZD1+LRP5)
WNT3_FZD2_LRP5	WNT3_FZD2_LRP5	WNT	WNT3	FZD2_LRP5	WNT agonist	WNT antagonist	WNT activation receptor	WNT inhibition receptor	KEGG: hsa04310; PMID: 23209147	Secreted Signaling	WNT3 - (FZD2+LRP5)
WNT3_FZD3_LRP5	WNT3_FZD3_LRP5	WNT	WNT3	FZD3_LRP5	WNT agonist	WNT antagonist	WNT activation receptor	WNT inhibition receptor	KEGG: hsa04310; PMID: 23209147	Secreted Signaling	WNT3 - (FZD3+LRP5)
WNT3_FZD4_LRP5	WNT3_FZD4_LRP5	WNT	WNT3	FZD4_LRP5	WNT agonist	WNT antagonist	WNT activation receptor	WNT inhibition receptor	KEGG: hsa04310; PMID: 23209147	Secreted Signaling	WNT3 - (FZD4+LRP5)
WNT3_FZD5_LRP5	WNT3_FZD5_LRP5	WNT	WNT3	FZD5_LRP5	WNT agonist	WNT antagonist	WNT activation receptor	WNT inhibition receptor	KEGG: hsa04310; PMID: 23209147	Secreted Signaling	WNT3 - (FZD5+LRP5)
WNT3_FZD6_LRP5	WNT3_FZD6_LRP5	WNT	WNT3	FZD6_LRP5	WNT agonist	WNT antagonist	WNT activation receptor	WNT inhibition receptor	KEGG: hsa04310; PMID: 23209147	Secreted Signaling	WNT3 - (FZD6+LRP5)
WNT3_FZD7_LRP5	WNT3_FZD7_LRP5	WNT	WNT3	FZD7_LRP5	WNT agonist	WNT antagonist	WNT activation receptor	WNT inhibition receptor	KEGG: hsa04310; PMID: 23209147	Secreted Signaling	WNT3 - (FZD7+LRP5)
WNT3_FZD8_LRP5	WNT3_FZD8_LRP5	WNT	WNT3	FZD8_LRP5	WNT agonist	WNT antagonist	WNT activation receptor	WNT inhibition receptor	KEGG: hsa04310; PMID: 23209147	Secreted Signaling	WNT3 - (FZD8+LRP5)
WNT3_FZD9_LRP5	WNT3_FZD9_LRP5	WNT	WNT3	FZD9_LRP5	WNT agonist	WNT antagonist	WNT activation receptor	WNT inhibition receptor	KEGG: hsa04310; PMID: 23209147	Secreted Signaling	WNT3 - (FZD9+LRP5)
WNT7B_FZD1_LRP5	WNT7B_FZD1_LRP5	WNT	WNT7B	FZD1_LRP5	WNT agonist	WNT antagonist	WNT activation receptor	WNT inhibition receptor	KEGG: hsa04310; PMID: 23209147	Secreted Signaling	WNT7B - (FZD1+LRP5)
WNT7B_FZD2_LRP5	WNT7B_FZD2_LRP5	WNT	WNT7B	FZD2_LRP5	WNT agonist	WNT antagonist	WNT activation receptor	WNT inhibition receptor	KEGG: hsa04310; PMID: 23209147	Secreted Signaling	WNT7B - (FZD2+LRP5)
WNT7B_FZD3_LRP5	WNT7B_FZD3_LRP5	WNT	WNT7B	FZD3_LRP5	WNT agonist	WNT antagonist	WNT activation receptor	WNT inhibition receptor	KEGG: hsa04310; PMID: 23209147	Secreted Signaling	WNT7B - (FZD3+LRP5)
WNT7B_FZD4_LRP5	WNT7B_FZD4_LRP5	WNT	WNT7B	FZD4_LRP5	WNT agonist	WNT antagonist	WNT activation receptor	WNT inhibition receptor	KEGG: hsa04310; PMID: 23209147	Secreted Signaling	WNT7B - (FZD4+LRP5)
WNT7B_FZD5_LRP5	WNT7B_FZD5_LRP5	WNT	WNT7B	FZD5_LRP5	WNT agonist	WNT antagonist	WNT activation receptor	WNT inhibition receptor	KEGG: hsa04310; PMID: 23209147	Secreted Signaling	WNT7B - (FZD5+LRP5)
WNT7B_FZD6_LRP5	WNT7B_FZD6_LRP5	WNT	WNT7B	FZD6_LRP5	WNT agonist	WNT antagonist	WNT activation receptor	WNT inhibition receptor	KEGG: hsa04310; PMID: 23209147	Secreted Signaling	WNT7B - (FZD6+LRP5)
WNT7B_FZD7_LRP5	WNT7B_FZD7_LRP5	WNT	WNT7B	FZD7_LRP5	WNT agonist	WNT antagonist	WNT activation receptor	WNT inhibition receptor	KEGG: hsa04310; PMID: 23209147	Secreted Signaling	WNT7B - (FZD7+LRP5)
WNT7B_FZD8_LRP5	WNT7B_FZD8_LRP5	WNT	WNT7B	FZD8_LRP5	WNT agonist	WNT antagonist	WNT activation receptor	WNT inhibition receptor	KEGG: hsa04310; PMID: 23209147	Secreted Signaling	WNT7B - (FZD8+LRP5)
WNT7B_FZD9_LRP5	WNT7B_FZD9_LRP5	WNT	WNT7B	FZD9_LRP5	WNT agonist	WNT antagonist	WNT activation receptor	WNT inhibition receptor	KEGG: hsa04310; PMID: 23209147	Secreted Signaling	WNT7B - (FZD9+LRP5)
WNT9A_FZD1_LRP5	WNT9A_FZD1_LRP5	WNT	WNT9A	FZD1_LRP5	WNT agonist	WNT antagonist	WNT activation receptor	WNT inhibition receptor	KEGG: hsa04310; PMID: 23209147	Secreted Signaling	WNT9A - (FZD1+LRP5)
WNT9A_FZD2_LRP5	WNT9A_FZD2_LRP5	WNT	WNT9A	FZD2_LRP5	WNT agonist	WNT antagonist	WNT activation receptor	WNT inhibition receptor	KEGG: hsa04310; PMID: 23209147	Secreted Signaling	WNT9A - (FZD2+LRP5)
WNT9A_FZD3_LRP5	WNT9A_FZD3_LRP5	WNT	WNT9A	FZD3_LRP5	WNT agonist	WNT antagonist	WNT activation receptor	WNT inhibition receptor	KEGG: hsa04310; PMID: 23209147	Secreted Signaling	WNT9A - (FZD3+LRP5)
WNT9A_FZD4_LRP5	WNT9A_FZD4_LRP5	WNT	WNT9A	FZD4_LRP5	WNT agonist	WNT antagonist	WNT activation receptor	WNT inhibition receptor	KEGG: hsa04310; PMID: 23209147	Secreted Signaling	WNT9A - (FZD4+LRP5)
WNT9A_FZD5_LRP5	WNT9A_FZD5_LRP5	WNT	WNT9A	FZD5_LRP5	WNT agonist	WNT antagonist	WNT activation receptor	WNT inhibition receptor	KEGG: hsa04310; PMID: 23209147	Secreted Signaling	WNT9A - (FZD5+LRP5)
WNT9A_FZD6_LRP5	WNT9A_FZD6_LRP5	WNT	WNT9A	FZD6_LRP5	WNT agonist	WNT antagonist	WNT activation receptor	WNT inhibition receptor	KEGG: hsa04310; PMID: 23209147	Secreted Signaling	WNT9A - (FZD6+LRP5)
WNT9A_FZD7_LRP5	WNT9A_FZD7_LRP5	WNT	WNT9A	FZD7_LRP5	WNT agonist	WNT antagonist	WNT activation receptor	WNT inhibition receptor	KEGG: hsa04310; PMID: 23209147	Secreted Signaling	WNT9A - (FZD7+LRP5)
WNT9A_FZD8_LRP5	WNT9A_FZD8_LRP5	WNT	WNT9A	FZD8_LRP5	WNT agonist	WNT antagonist	WNT activation receptor	WNT inhibition receptor	KEGG: hsa04310; PMID: 23209147	Secreted Signaling	WNT9A - (FZD8+LRP5)
WNT9A_FZD9_LRP5	WNT9A_FZD9_LRP5	WNT	WNT9A	FZD9_LRP5	WNT agonist	WNT antagonist	WNT activation receptor	WNT inhibition receptor	KEGG: hsa04310; PMID: 23209147	Secreted Signaling	WNT9A - (FZD9+LRP5)
WNT10B_FZD1_LRP6	WNT10B_FZD1_LRP6	WNT	WNT10B	FZD1_LRP6	WNT agonist	WNT antagonist	WNT activation receptor	WNT inhibition receptor	KEGG: hsa04310; PMID: 23209147	Secreted Signaling	WNT10B - (FZD1+LRP6)
WNT10B_FZD2_LRP6	WNT10B_FZD2_LRP6	WNT	WNT10B	FZD2_LRP6	WNT agonist	WNT antagonist	WNT activation receptor	WNT inhibition receptor	KEGG: hsa04310; PMID: 23209147	Secreted Signaling	WNT10B - (FZD2+LRP6)
WNT10B_FZD3_LRP6	WNT10B_FZD3_LRP6	WNT	WNT10B	FZD3_LRP6	WNT agonist	WNT antagonist	WNT activation receptor	WNT inhibition receptor	KEGG: hsa04310; PMID: 23209147	Secreted Signaling	WNT10B - (FZD3+LRP6)
WNT10B_FZD4_LRP6	WNT10B_FZD4_LRP6	WNT	WNT10B	FZD4_LRP6	WNT agonist	WNT antagonist	WNT activation receptor	WNT inhibition receptor	KEGG: hsa04310; PMID: 23209147	Secreted Signaling	WNT10B - (FZD4+LRP6)
WNT10B_FZD5_LRP6	WNT10B_FZD5_LRP6	WNT	WNT10B	FZD5_LRP6	WNT agonist	WNT antagonist	WNT activation receptor	WNT inhibition receptor	KEGG: hsa04310; PMID: 23209147	Secreted Signaling	WNT10B - (FZD5+LRP6)
WNT10B_FZD6_LRP6	WNT10B_FZD6_LRP6	WNT	WNT10B	FZD6_LRP6	WNT agonist	WNT antagonist	WNT activation receptor	WNT inhibition receptor	KEGG: hsa04310; PMID: 23209147	Secreted Signaling	WNT10B - (FZD6+LRP6)
WNT10B_FZD7_LRP6	WNT10B_FZD7_LRP6	WNT	WNT10B	FZD7_LRP6	WNT agonist	WNT antagonist	WNT activation receptor	WNT inhibition receptor	KEGG: hsa04310; PMID: 23209147	Secreted Signaling	WNT10B - (FZD7+LRP6)
WNT10B_FZD8_LRP6	WNT10B_FZD8_LRP6	WNT	WNT10B	FZD8_LRP6	WNT agonist	WNT antagonist	WNT activation receptor	WNT inhibition receptor	KEGG: hsa04310; PMID: 23209147	Secreted Signaling	WNT10B - (FZD8+LRP6)
WNT10B_FZD9_LRP6	WNT10B_FZD9_LRP6	WNT	WNT10B	FZD9_LRP6	WNT agonist	WNT antagonist	WNT activation receptor	WNT inhibition receptor	KEGG: hsa04310; PMID: 23209147	Secreted Signaling	WNT10B - (FZD9+LRP6)
WNT16_FZD1_LRP6	WNT16_FZD1_LRP6	WNT	WNT16	FZD1_LRP6	WNT agonist	WNT antagonist	WNT activation receptor	WNT inhibition receptor	KEGG: hsa04310; PMID: 23209147	Secreted Signaling	WNT16 - (FZD1+LRP6)
WNT16_FZD2_LRP6	WNT16_FZD2_LRP6	WNT	WNT16	FZD2_LRP6	WNT agonist	WNT antagonist	WNT activation receptor	WNT inhibition receptor	KEGG: hsa04310; PMID: 23209147	Secreted Signaling	WNT16 - (FZD2+LRP6)
WNT16_FZD3_LRP6	WNT16_FZD3_LRP6	WNT	WNT16	FZD3_LRP6	WNT agonist	WNT antagonist	WNT activation receptor	WNT inhibition receptor	KEGG: hsa04310; PMID: 23209147	Secreted Signaling	WNT16 - (FZD3+LRP6)
WNT16_FZD4_LRP6	WNT16_FZD4_LRP6	WNT	WNT16	FZD4_LRP6	WNT agonist	WNT antagonist	WNT activation receptor	WNT inhibition receptor	KEGG: hsa04310; PMID: 23209147	Secreted Signaling	WNT16 - (FZD4+LRP6)
WNT16_FZD5_LRP6	WNT16_FZD5_LRP6	WNT	WNT16	FZD5_LRP6	WNT agonist	WNT antagonist	WNT activation receptor	WNT inhibition receptor	KEGG: hsa04310; PMID: 23209147	Secreted Signaling	WNT16 - (FZD5+LRP6)
WNT16_FZD6_LRP6	WNT16_FZD6_LRP6	WNT	WNT16	FZD6_LRP6	WNT agonist	WNT antagonist	WNT activation receptor	WNT inhibition receptor	KEGG: hsa04310; PMID: 23209147	Secreted Signaling	WNT16 - (FZD6+LRP6)
WNT16_FZD7_LRP6	WNT16_FZD7_LRP6	WNT	WNT16	FZD7_LRP6	WNT agonist	WNT antagonist	WNT activation receptor	WNT inhibition receptor	KEGG: hsa04310; PMID: 23209147	Secreted Signaling	WNT16 - (FZD7+LRP6)
WNT16_FZD8_LRP6	WNT16_FZD8_LRP6	WNT	WNT16	FZD8_LRP6	WNT agonist	WNT antagonist	WNT activation receptor	WNT inhibition receptor	KEGG: hsa04310; PMID: 23209147	Secreted Signaling	WNT16 - (FZD8+LRP6)
WNT16_FZD9_LRP6	WNT16_FZD9_LRP6	WNT	WNT16	FZD9_LRP6	WNT agonist	WNT antagonist	WNT activation receptor	WNT inhibition receptor	KEGG: hsa04310; PMID: 23209147	Secreted Signaling	WNT16 - (FZD9+LRP6)
WNT2_FZD1_LRP6	WNT2_FZD1_LRP6	WNT	WNT2	FZD1_LRP6	WNT agonist	WNT antagonist	WNT activation receptor	WNT inhibition receptor	KEGG: hsa04310; PMID: 23209147	Secreted Signaling	WNT2 - (FZD1+LRP6)
WNT2_FZD2_LRP6	WNT2_FZD2_LRP6	WNT	WNT2	FZD2_LRP6	WNT agonist	WNT antagonist	WNT activation receptor	WNT inhibition receptor	KEGG: hsa04310; PMID: 23209147	Secreted Signaling	WNT2 - (FZD2+LRP6)
WNT2_FZD3_LRP6	WNT2_FZD3_LRP6	WNT	WNT2	FZD3_LRP6	WNT agonist	WNT antagonist	WNT activation receptor	WNT inhibition receptor	KEGG: hsa04310; PMID: 23209147	Secreted Signaling	WNT2 - (FZD3+LRP6)
WNT2_FZD4_LRP6	WNT2_FZD4_LRP6	WNT	WNT2	FZD4_LRP6	WNT agonist	WNT antagonist	WNT activation receptor	WNT inhibition receptor	KEGG: hsa04310; PMID: 23209147	Secreted Signaling	WNT2 - (FZD4+LRP6)
WNT2_FZD5_LRP6	WNT2_FZD5_LRP6	WNT	WNT2	FZD5_LRP6	WNT agonist	WNT antagonist	WNT activation receptor	WNT inhibition receptor	KEGG: hsa04310; PMID: 23209147	Secreted Signaling	WNT2 - (FZD5+LRP6)
WNT2_FZD6_LRP6	WNT2_FZD6_LRP6	WNT	WNT2	FZD6_LRP6	WNT agonist	WNT antagonist	WNT activation receptor	WNT inhibition receptor	KEGG: hsa04310; PMID: 23209147	Secreted Signaling	WNT2 - (FZD6+LRP6)
WNT2_FZD7_LRP6	WNT2_FZD7_LRP6	WNT	WNT2	FZD7_LRP6	WNT agonist	WNT antagonist	WNT activation receptor	WNT inhibition receptor	KEGG: hsa04310; PMID: 23209147	Secreted Signaling	WNT2 - (FZD7+LRP6)
WNT2_FZD8_LRP6	WNT2_FZD8_LRP6	WNT	WNT2	FZD8_LRP6	WNT agonist	WNT antagonist	WNT activation receptor	WNT inhibition receptor	KEGG: hsa04310; PMID: 23209147	Secreted Signaling	WNT2 - (FZD8+LRP6)
WNT2_FZD9_LRP6	WNT2_FZD9_LRP6	WNT	WNT2	FZD9_LRP6	WNT agonist	WNT antagonist	WNT activation receptor	WNT inhibition receptor	KEGG: hsa04310; PMID: 23209147	Secreted Signaling	WNT2 - (FZD9+LRP6)
WNT2B_FZD1_LRP6	WNT2B_FZD1_LRP6	WNT	WNT2B	FZD1_LRP6	WNT agonist	WNT antagonist	WNT activation receptor	WNT inhibition receptor	KEGG: hsa04310; PMID: 23209147	Secreted Signaling	WNT2B - (FZD1+LRP6)
WNT2B_FZD2_LRP6	WNT2B_FZD2_LRP6	WNT	WNT2B	FZD2_LRP6	WNT agonist	WNT antagonist	WNT activation receptor	WNT inhibition receptor	KEGG: hsa04310; PMID: 23209147	Secreted Signaling	WNT2B - (FZD2+LRP6)
WNT2B_FZD3_LRP6	WNT2B_FZD3_LRP6	WNT	WNT2B	FZD3_LRP6	WNT agonist	WNT antagonist	WNT activation receptor	WNT inhibition receptor	KEGG: hsa04310; PMID: 23209147	Secreted Signaling	WNT2B - (FZD3+LRP6)
WNT2B_FZD4_LRP6	WNT2B_FZD4_LRP6	WNT	WNT2B	FZD4_LRP6	WNT agonist	WNT antagonist	WNT activation receptor	WNT inhibition receptor	KEGG: hsa04310; PMID: 23209147	Secreted Signaling	WNT2B - (FZD4+LRP6)
WNT2B_FZD5_LRP6	WNT2B_FZD5_LRP6	WNT	WNT2B	FZD5_LRP6	WNT agonist	WNT antagonist	WNT activation receptor	WNT inhibition receptor	KEGG: hsa04310; PMID: 23209147	Secreted Signaling	WNT2B - (FZD5+LRP6)
WNT2B_FZD6_LRP6	WNT2B_FZD6_LRP6	WNT	WNT2B	FZD6_LRP6	WNT agonist	WNT antagonist	WNT activation receptor	WNT inhibition receptor	KEGG: hsa04310; PMID: 23209147	Secreted Signaling	WNT2B - (FZD6+LRP6)
WNT2B_FZD7_LRP6	WNT2B_FZD7_LRP6	WNT	WNT2B	FZD7_LRP6	WNT agonist	WNT antagonist	WNT activation receptor	WNT inhibition receptor	KEGG: hsa04310; PMID: 23209147	Secreted Signaling	WNT2B - (FZD7+LRP6)
WNT2B_FZD8_LRP6	WNT2B_FZD8_LRP6	WNT	WNT2B	FZD8_LRP6	WNT agonist	WNT antagonist	WNT activation receptor	WNT inhibition receptor	KEGG: hsa04310; PMID: 23209147	Secreted Signaling	WNT2B - (FZD8+LRP6)
WNT2B_FZD9_LRP6	WNT2B_FZD9_LRP6	WNT	WNT2B	FZD9_LRP6	WNT agonist	WNT antagonist	WNT activation receptor	WNT inhibition receptor	KEGG: hsa04310; PMID: 23209147	Secreted Signaling	WNT2B - (FZD9+LRP6)
WNT3_FZD1_LRP6	WNT3_FZD1_LRP6	WNT	WNT3	FZD1_LRP6	WNT agonist	WNT antagonist	WNT activation receptor	WNT inhibition receptor	KEGG: hsa04310; PMID: 23209147	Secreted Signaling	WNT3 - (FZD1+LRP6)
WNT3_FZD2_LRP6	WNT3_FZD2_LRP6	WNT	WNT3	FZD2_LRP6	WNT agonist	WNT antagonist	WNT activation receptor	WNT inhibition receptor	KEGG: hsa04310; PMID: 23209147	Secreted Signaling	WNT3 - (FZD2+LRP6)
WNT3_FZD3_LRP6	WNT3_FZD3_LRP6	WNT	WNT3	FZD3_LRP6	WNT agonist	WNT antagonist	WNT activation receptor	WNT inhibition receptor	KEGG: hsa04310; PMID: 23209147	Secreted Signaling	WNT3 - (FZD3+LRP6)
WNT3_FZD4_LRP6	WNT3_FZD4_LRP6	WNT	WNT3	FZD4_LRP6	WNT agonist	WNT antagonist	WNT activation receptor	WNT inhibition receptor	KEGG: hsa04310; PMID: 23209147	Secreted Signaling	WNT3 - (FZD4+LRP6)
WNT3_FZD5_LRP6	WNT3_FZD5_LRP6	WNT	WNT3	FZD5_LRP6	WNT agonist	WNT antagonist	WNT activation receptor	WNT inhibition receptor	KEGG: hsa04310; PMID: 23209147	Secreted Signaling	WNT3 - (FZD5+LRP6)
WNT3_FZD6_LRP6	WNT3_FZD6_LRP6	WNT	WNT3	FZD6_LRP6	WNT agonist	WNT antagonist	WNT activation receptor	WNT inhibition receptor	KEGG: hsa04310; PMID: 23209147	Secreted Signaling	WNT3 - (FZD6+LRP6)
WNT3_FZD7_LRP6	WNT3_FZD7_LRP6	WNT	WNT3	FZD7_LRP6	WNT agonist	WNT antagonist	WNT activation receptor	WNT inhibition receptor	KEGG: hsa04310; PMID: 23209147	Secreted Signaling	WNT3 - (FZD7+LRP6)
WNT3_FZD8_LRP6	WNT3_FZD8_LRP6	WNT	WNT3	FZD8_LRP6	WNT agonist	WNT antagonist	WNT activation receptor	WNT inhibition receptor	KEGG: hsa04310; PMID: 23209147	Secreted Signaling	WNT3 - (FZD8+LRP6)
WNT3_FZD9_LRP6	WNT3_FZD9_LRP6	WNT	WNT3	FZD9_LRP6	WNT agonist	WNT antagonist	WNT activation receptor	WNT inhibition receptor	KEGG: hsa04310; PMID: 23209147	Secreted Signaling	WNT3 - (FZD9+LRP6)
WNT7B_FZD1_LRP6	WNT7B_FZD1_LRP6	WNT	WNT7B	FZD1_LRP6	WNT agonist	WNT antagonist	WNT activation receptor	WNT inhibition receptor	KEGG: hsa04310; PMID: 23209147	Secreted Signaling	WNT7B - (FZD1+LRP6)
WNT7B_FZD2_LRP6	WNT7B_FZD2_LRP6	WNT	WNT7B	FZD2_LRP6	WNT agonist	WNT antagonist	WNT activation receptor	WNT inhibition receptor	KEGG: hsa04310; PMID: 23209147	Secreted Signaling	WNT7B - (FZD2+LRP6)
WNT7B_FZD3_LRP6	WNT7B_FZD3_LRP6	WNT	WNT7B	FZD3_LRP6	WNT agonist	WNT antagonist	WNT activation receptor	WNT inhibition receptor	KEGG: hsa04310; PMID: 23209147	Secreted Signaling	WNT7B - (FZD3+LRP6)
WNT7B_FZD4_LRP6	WNT7B_FZD4_LRP6	WNT	WNT7B	FZD4_LRP6	WNT agonist	WNT antagonist	WNT activation receptor	WNT inhibition receptor	KEGG: hsa04310; PMID: 23209147	Secreted Signaling	WNT7B - (FZD4+LRP6)
WNT7B_FZD5_LRP6	WNT7B_FZD5_LRP6	WNT	WNT7B	FZD5_LRP6	WNT agonist	WNT antagonist	WNT activation receptor	WNT inhibition receptor	KEGG: hsa04310; PMID: 23209147	Secreted Signaling	WNT7B - (FZD5+LRP6)
WNT7B_FZD6_LRP6	WNT7B_FZD6_LRP6	WNT	WNT7B	FZD6_LRP6	WNT agonist	WNT antagonist	WNT activation receptor	WNT inhibition receptor	KEGG: hsa04310; PMID: 23209147	Secreted Signaling	WNT7B - (FZD6+LRP6)
WNT7B_FZD7_LRP6	WNT7B_FZD7_LRP6	WNT	WNT7B	FZD7_LRP6	WNT agonist	WNT antagonist	WNT activation receptor	WNT inhibition receptor	KEGG: hsa04310; PMID: 23209147	Secreted Signaling	WNT7B - (FZD7+LRP6)
WNT7B_FZD8_LRP6	WNT7B_FZD8_LRP6	WNT	WNT7B	FZD8_LRP6	WNT agonist	WNT antagonist	WNT activation receptor	WNT inhibition receptor	KEGG: hsa04310; PMID: 23209147	Secreted Signaling	WNT7B - (FZD8+LRP6)
WNT7B_FZD9_LRP6	WNT7B_FZD9_LRP6	WNT	WNT7B	FZD9_LRP6	WNT agonist	WNT antagonist	WNT activation receptor	WNT inhibition receptor	KEGG: hsa04310; PMID: 23209147	Secreted Signaling	WNT7B - (FZD9+LRP6)
WNT9A_FZD1_LRP6	WNT9A_FZD1_LRP6	WNT	WNT9A	FZD1_LRP6	WNT agonist	WNT antagonist	WNT activation receptor	WNT inhibition receptor	KEGG: hsa04310; PMID: 23209147	Secreted Signaling	WNT9A - (FZD1+LRP6)
WNT9A_FZD2_LRP6	WNT9A_FZD2_LRP6	WNT	WNT9A	FZD2_LRP6	WNT agonist	WNT antagonist	WNT activation receptor	WNT inhibition receptor	KEGG: hsa04310; PMID: 23209147	Secreted Signaling	WNT9A - (FZD2+LRP6)
WNT9A_FZD3_LRP6	WNT9A_FZD3_LRP6	WNT	WNT9A	FZD3_LRP6	WNT agonist	WNT antagonist	WNT activation receptor	WNT inhibition receptor	KEGG: hsa04310; PMID: 23209147	Secreted Signaling	WNT9A - (FZD3+LRP6)
WNT9A_FZD4_LRP6	WNT9A_FZD4_LRP6	WNT	WNT9A	FZD4_LRP6	WNT agonist	WNT antagonist	WNT activation receptor	WNT inhibition receptor	KEGG: hsa04310; PMID: 23209147	Secreted Signaling	WNT9A - (FZD4+LRP6)
WNT9A_FZD5_LRP6	WNT9A_FZD5_LRP6	WNT	WNT9A	FZD5_LRP6	WNT agonist	WNT antagonist	WNT activation receptor	WNT inhibition receptor	KEGG: hsa04310; PMID: 23209147	Secreted Signaling	WNT9A - (FZD5+LRP6)
WNT9A_FZD6_LRP6	WNT9A_FZD6_LRP6	WNT	WNT9A	FZD6_LRP6	WNT agonist	WNT antagonist	WNT activation receptor	WNT inhibition receptor	KEGG: hsa04310; PMID: 23209147	Secreted Signaling	WNT9A - (FZD6+LRP6)
WNT9A_FZD7_LRP6	WNT9A_FZD7_LRP6	WNT	WNT9A	FZD7_LRP6	WNT agonist	WNT antagonist	WNT activation receptor	WNT inhibition receptor	KEGG: hsa04310; PMID: 23209147	Secreted Signaling	WNT9A - (FZD7+LRP6)
WNT9A_FZD8_LRP6	WNT9A_FZD8_LRP6	WNT	WNT9A	FZD8_LRP6	WNT agonist	WNT antagonist	WNT activation receptor	WNT inhibition receptor	KEGG: hsa04310; PMID: 23209147	Secreted Signaling	WNT9A - (FZD8+LRP6)
WNT9A_FZD9_LRP6	WNT9A_FZD9_LRP6	WNT	WNT9A	FZD9_LRP6	WNT agonist	WNT antagonist	WNT activation receptor	WNT inhibition receptor	KEGG: hsa04310; PMID: 23209147	Secreted Signaling	WNT9A - (FZD9+LRP6)
WNT5A_FZD1	WNT5A_FZD1	ncWNT	WNT5A	FZD1			ncWNT activation receptor		KEGG: hsa04310	Secreted Signaling	WNT5A - FZD1
WNT5A_FZD2	WNT5A_FZD2	ncWNT	WNT5A	FZD2			ncWNT activation receptor		KEGG: hsa04310	Secreted Signaling	WNT5A - FZD2
WNT5A_FZD3	WNT5A_FZD3	ncWNT	WNT5A	FZD3			ncWNT activation receptor		KEGG: hsa04310	Secreted Signaling	WNT5A - FZD3
WNT5A_FZD4	WNT5A_FZD4	ncWNT	WNT5A	FZD4			ncWNT activation receptor		KEGG: hsa04310	Secreted Signaling	WNT5A - FZD4
WNT5A_FZD5	WNT5A_FZD5	ncWNT	WNT5A	FZD5			ncWNT activation receptor		KEGG: hsa04310	Secreted Signaling	WNT5A - FZD5
WNT5A_FZD6	WNT5A_FZD6	ncWNT	WNT5A	FZD6			ncWNT activation receptor		KEGG: hsa04310	Secreted Signaling	WNT5A - FZD6
WNT5A_FZD7	WNT5A_FZD7	ncWNT	WNT5A	FZD7			ncWNT activation receptor		KEGG: hsa04310	Secreted Signaling	WNT5A - FZD7
WNT5A_FZD8	WNT5A_FZD8	ncWNT	WNT5A	FZD8			ncWNT activation receptor		KEGG: hsa04310	Secreted Signaling	WNT5A - FZD8
WNT5A_FZD9	WNT5A_FZD9	ncWNT	WNT5A	FZD9			ncWNT activation receptor		KEGG: hsa04310	Secreted Signaling	WNT5A - FZD9
WNT5A_MCAM	WNT5A_MCAM	ncWNT	WNT5A	MCAM					PMID: 24335906	Secreted Signaling	WNT5A - MCAM
WNT5B_FZD1	WNT5B_FZD1	ncWNT	WNT5B	FZD1			ncWNT activation receptor		KEGG: hsa04310	Secreted Signaling	WNT5B - FZD1
WNT5B_FZD2	WNT5B_FZD2	ncWNT	WNT5B	FZD2			ncWNT activation receptor		KEGG: hsa04310	Secreted Signaling	WNT5B - FZD2
WNT5B_FZD3	WNT5B_FZD3	ncWNT	WNT5B	FZD3			ncWNT activation receptor		KEGG: hsa04310	Secreted Signaling	WNT5B - FZD3
WNT5B_FZD4	WNT5B_FZD4	ncWNT	WNT5B	FZD4			ncWNT activation receptor		KEGG: hsa04310	Secreted Signaling	WNT5B - FZD4
WNT5B_FZD5	WNT5B_FZD5	ncWNT	WNT5B	FZD5			ncWNT activation receptor		KEGG: hsa04310	Secreted Signaling	WNT5B - FZD5
WNT5B_FZD6	WNT5B_FZD6	ncWNT	WNT5B	FZD6			ncWNT activation receptor		KEGG: hsa04310	Secreted Signaling	WNT5B - FZD6
WNT5B_FZD7	WNT5B_FZD7	ncWNT	WNT5B	FZD7			ncWNT activation receptor		KEGG: hsa04310	Secreted Signaling	WNT5B - FZD7
WNT5B_FZD8	WNT5B_FZD8	ncWNT	WNT5B	FZD8			ncWNT activation receptor		KEGG: hsa04310	Secreted Signaling	WNT5B - FZD8
WNT5B_FZD9	WNT5B_FZD9	ncWNT	WNT5B	FZD9			ncWNT activation receptor		KEGG: hsa04310	Secreted Signaling	WNT5B - FZD9
EGF_EGFR	EGF_EGFR	EGF	EGF	EGFR					KEGG: hsa04012	Secreted Signaling	EGF - EGFR
EGF_EGFR_ERBB2	EGF_EGFR_ERBB2	EGF	EGF	EGFR_ERBB2					KEGG: hsa04012	Secreted Signaling	EGF - (EGFR+ERBB2)
AREG_EGFR	AREG_EGFR	EGF	AREG	EGFR					KEGG: hsa04012	Secreted Signaling	AREG - EGFR
AREG_EGFR_ERBB2	AREG_EGFR_ERBB2	EGF	AREG	EGFR_ERBB2					KEGG: hsa04012	Secreted Signaling	AREG - (EGFR+ERBB2)
HBEGF_EGFR	HBEGF_EGFR	EGF	HBEGF	EGFR					KEGG: hsa04012	Secreted Signaling	HBEGF - EGFR
HBEGF_EGFR_ERBB2	HBEGF_EGFR_ERBB2	EGF	HBEGF	EGFR_ERBB2					KEGG: hsa04012	Secreted Signaling	HBEGF - (EGFR+ERBB2)
HBEGF_ERBB2_ERBB4	HBEGF_ERBB2_ERBB4	EGF	HBEGF	ERBB2_ERBB4					KEGG: hsa04012	Secreted Signaling	HBEGF - (ERBB2+ERBB4)
EREG_EGFR	EREG_EGFR	EGF	EREG	EGFR					KEGG: hsa04012	Secreted Signaling	EREG - EGFR
EREG_EGFR_ERBB2	EREG_EGFR_ERBB2	EGF	EREG	EGFR_ERBB2					KEGG: hsa04012	Secreted Signaling	EREG - (EGFR+ERBB2)
EREG_ERBB2_ERBB4	EREG_ERBB2_ERBB4	EGF	EREG	ERBB2_ERBB4					KEGG: hsa04012	Secreted Signaling	EREG - (ERBB2+ERBB4)
NRG1_ERBB2_ERBB3	NRG1_ERBB2_ERBB3	NRG	NRG1	ERBB2_ERBB3					KEGG: hsa04012	Secreted Signaling	NRG1 - (ERBB2+ERBB3)
NRG1_ERBB2_ERBB4	NRG1_ERBB2_ERBB4	NRG	NRG1	ERBB2_ERBB4					KEGG: hsa04012	Secreted Signaling	NRG1 - (ERBB2+ERBB4)
NRG2_ERBB2_ERBB3	NRG2_ERBB2_ERBB3	NRG	NRG2	ERBB2_ERBB3					KEGG: hsa04012	Secreted Signaling	NRG2 - (ERBB2+ERBB3)
NRG2_ERBB2_ERBB4	NRG2_ERBB2_ERBB4	NRG	NRG2	ERBB2_ERBB4					KEGG: hsa04012	Secreted Signaling	NRG2 - (ERBB2+ERBB4)
NRG1_ITGAV_ITGB3	NRG1_ITGAV_ITGB3	NRG	NRG1	ITGAV_ITGB3					PMID: 20682778	Secreted Signaling	NRG1 - (ITGAV+ITGB3)
FGF1_FGFR1	FGF1_FGFR1	FGF	FGF1	FGFR1				FGF inhibition receptor	PMC: 4393358	Secreted Signaling	FGF1 - FGFR1
FGF1_FGFR2	FGF1_FGFR2	FGF	FGF1	FGFR2				FGF inhibition receptor	PMC: 4393358	Secreted Signaling	FGF1 - FGFR2
FGF1_FGFR3	FGF1_FGFR3	FGF	FGF1	FGFR3				FGF inhibition receptor	PMC: 4393358	Secreted Signaling	FGF1 - FGFR3
FGF1_FGFR4	FGF1_FGFR4	FGF	FGF1	FGFR4				FGF inhibition receptor	PMC: 4393358	Secreted Signaling	FGF1 - FGFR4
FGF2_FGFR1	FGF2_FGFR1	FGF	FGF2	FGFR1				FGF inhibition receptor	PMC: 4393358	Secreted Signaling	FGF2 - FGFR1
FGF2_FGFR2	FGF2_FGFR2	FGF	FGF2	FGFR2				FGF inhibition receptor	PMC: 4393358	Secreted Signaling	FGF2 - FGFR2
FGF2_FGFR3	FGF2_FGFR3	FGF	FGF2	FGFR3				FGF inhibition receptor	PMC: 4393358	Secreted Signaling	FGF2 - FGFR3
FGF2_FGFR4	FGF2_FGFR4	FGF	FGF2	FGFR4				FGF inhibition receptor	PMC: 4393358	Secreted Signaling	FGF2 - FGFR4
FGF5_FGFR1	FGF5_FGFR1	FGF	FGF5	FGFR1				FGF inhibition receptor	PMC: 4393358	Secreted Signaling	FGF5 - FGFR1
FGF5_FGFR2	FGF5_FGFR2	FGF	FGF5	FGFR2				FGF inhibition receptor	PMC: 4393358	Secreted Signaling	FGF5 - FGFR2
FGF5_FGFR3	FGF5_FGFR3	FGF	FGF5	FGFR3				FGF inhibition receptor	PMC: 4393358	Secreted Signaling	FGF5 - FGFR3
FGF5_FGFR4	FGF5_FGFR4	FGF	FGF5	FGFR4				FGF inhibition receptor	PMC: 4393358	Secreted Signaling	FGF5 - FGFR4
FGF7_FGFR1	FGF7_FGFR1	FGF	FGF7	FGFR1				FGF inhibition receptor	PMC: 4393358	Secreted Signaling	FGF7 - FGFR1
FGF7_FGFR2	FGF7_FGFR2	FGF	FGF7	FGFR2				FGF inhibition receptor	PMC: 4393358	Secreted Signaling	FGF7 - FGFR2
FGF10_FGFR1	FGF10_FGFR1	FGF	FGF10	FGFR1				FGF inhibition receptor	PMC: 4393358	Secreted Signaling	FGF10 - FGFR1
FGF10_FGFR2	FGF10_FGFR2	FGF	FGF10	FGFR2				FGF inhibition receptor	PMC: 4393358	Secreted Signaling	FGF10 - FGFR2
FGF8_FGFR1	FGF8_FGFR1	FGF	FGF8	FGFR1				FGF inhibition receptor	PMC: 4393358	Secreted Signaling	FGF8 - FGFR1
FGF8_FGFR2	FGF8_FGFR2	FGF	FGF8	FGFR2				FGF inhibition receptor	PMC: 4393358	Secreted Signaling	FGF8 - FGFR2
FGF8_FGFR3	FGF8_FGFR3	FGF	FGF8	FGFR3				FGF inhibition receptor	PMC: 4393358	Secreted Signaling	FGF8 - FGFR3
FGF8_FGFR4	FGF8_FGFR4	FGF	FGF8	FGFR4				FGF inhibition receptor	PMC: 4393358	Secreted Signaling	FGF8 - FGFR4
PDGFA_PDGFRA	PDGFA_PDGFRA	PDGF	PDGFA	PDGFRA		PDGF antagonist			PMID: 15207812	Secreted Signaling	PDGFA - PDGFRA
PDGFA_PDGFRB	PDGFA_PDGFRB	PDGF	PDGFA	PDGFRB		PDGF antagonist			PMID: 15207812	Secreted Signaling	PDGFA - PDGFRB
PDGFC_PDGFRA	PDGFC_PDGFRA	PDGF	PDGFC	PDGFRA		PDGF antagonist			PMID: 15207812	Secreted Signaling	PDGFC - PDGFRA
PDGFD_PDGFRB	PDGFD_PDGFRB	PDGF	PDGFD	PDGFRB		PDGF antagonist			PMID: 15207812	Secreted Signaling	PDGFD - PDGFRB
IGF1_IGF1R	IGF1_IGF1R	IGF	IGF1	IGF1R		IGF antagonist			PMID: 14604834	Secreted Signaling	IGF1 - IGF1R
IGF1_ITGAV_ITGB3	IGF1_ITGAV_ITGB3	IGF	IGF1	ITGAV_ITGB3		IGF antagonist			PMID: 28190785; PMID: 28873464	Secreted Signaling	IGF1 - (ITGAV+ITGB3)
IGF1_ITGA6_ITGB4	IGF1_ITGA6_ITGB4	IGF	IGF1	ITGA6_ITGB4		IGF antagonist			PMID: 28190785; PMID: 28873464	Secreted Signaling	IGF1 - (ITGA6+ITGB4)
DHH_PTCH1	DHH_PTCH1	HH	DHH	PTCH1_SMO			HH activation receptor	HH inhibition receptor	KEGG: hsa04340; PMID: 25701396	Secreted Signaling	DHH - PTCH1
DHH_PTCH2	DHH_PTCH2	HH	DHH	PTCH2_SMO			HH activation receptor	HH inhibition receptor	KEGG: hsa04340; PMID: 25701396	Secreted Signaling	DHH - PTCH2
CCL5_CCR1	CCL5_CCR1	CCL	CCL5	CCR1					KEGG: hsa04060	Secreted Signaling	CCL5 - CCR1
CCL3_CCR1	CCL3_CCR1	CCL	CCL3	CCR1					KEGG: hsa04060	Secreted Signaling	CCL3 - CCR1
CCL3L1_CCR1	CCL3L1_CCR1	CCL	CCL3L1	CCR1					KEGG: hsa04060	Secreted Signaling	CCL3L1 - CCR1
CCL8_CCR1	CCL8_CCR1	CCL	CCL8	CCR1					KEGG: hsa04060	Secreted Signaling	CCL8 - CCR1
CCL7_CCR1	CCL7_CCR1	CCL	CCL7	CCR1					KEGG: hsa04060	Secreted Signaling	CCL7 - CCR1
CCL13_CCR1	CCL13_CCR1	CCL	CCL13	CCR1					KEGG: hsa04060	Secreted Signaling	CCL13 - CCR1
CCL13_ACKR4	CCL13_ACKR4	CCL	CCL13	ACKR4					PMID: 26740381	Secreted Signaling	CCL13 - ACKR4
CCL8_ACKR4	CCL8_ACKR4	CCL	CCL8	ACKR4					PMID: 26740381	Secreted Signaling	CCL8 - ACKR4
CXCL11_ACKR3	CXCL11_ACKR3	CXCL	CXCL11	ACKR3					KEGG: hsa04060	Secreted Signaling	CXCL11 - ACKR3
CXCL12_ACKR3	CXCL12_ACKR3	CXCL	CXCL12	ACKR3					KEGG: hsa04060	Secreted Signaling	CXCL12 - ACKR3
MIF_CD74_CXCR4	MIF_CD74_CXCR4	MIF	MIF	CD74_CXCR4					PMID: 29637711; PMID: 24760155	Secreted Signaling	MIF - (CD74+CXCR4)
MIF_CD74_CD44	MIF_CD74_CD44	MIF	MIF	CD74_CD44					PMID: 29637711; PMID: 26175090	Secreted Signaling	MIF - (CD74+CD44)
MIF_CD74_CXCR2	MIF_CD74_CXCR2	MIF	MIF	CD74_CXCR2					PMID: 29637711; PMID: 26175090	Secreted Signaling	MIF - (CD74+CXCR2)
MIF_ACKR3	MIF_ACKR3	MIF	MIF	ACKR3					PMID: 26175090	Secreted Signaling	MIF - ACKR3
IL7_IL7R_IL2RG	IL7_IL7R_IL2RG	IL2	IL7	IL7R_IL2RG					KEGG: hsa04060	Secreted Signaling	IL7 - (IL7R+IL2RG)
IL15_IL15RA_IL2RB	IL15_IL15RA_IL2RB	IL2	IL15	IL15RA_IL2RB					KEGG: hsa04060	Secreted Signaling	IL15 - (IL15RA+IL2RB)
TSLP_IL7R_CRLF2	TSLP_IL7R_CRLF2	IL2	TSLP	IL7R_CRLF2					KEGG: hsa04060	Secreted Signaling	TSLP - (IL7R+CRLF2)
IL6_IL6R_IL6ST	IL6_IL6R_IL6ST	IL6	IL6	IL6R_IL6ST					KEGG: hsa04060	Secreted Signaling	IL6 - (IL6R+IL6ST)
IL11_IL11RA_IL6ST	IL11_IL11RA_IL6ST	IL6	IL11	IL11R complex					KEGG: hsa04060	Secreted Signaling	IL11 - (IL11RA+IL6ST)
IL12B_IL12RB1_IL12RB2	IL12B_IL12RB1_IL12RB2	IL12	IL12AB	IL12RB1_IL12RB2					PMID: 26918147	Secreted Signaling	IL12B - (IL12RB1+IL12RB2)
IL23A_IL23R_IL12RB1	IL23A_IL23R_IL12RB1	IL12	IL23 complex	IL23R_IL12RB1					PMID: 11114383	Secreted Signaling	IL23A - (IL23R+IL12RB1)
CLCF1_CNTFR_LIFR	CLCF1_CNTFR_LIFR	LIFR	CLCF1	CNTFR_LIFR					KEGG: hsa04060	Secreted Signaling	CLCF1 - (CNTFR+LIFR)
CTF1_LIFR_IL6ST	CTF1_LIFR_IL6ST	LIFR	CTF1	LIFR_IL6ST					KEGG: hsa04060	Secreted Signaling	CTF1 - (LIFR+IL6ST)
LIF_LIFR_IL6ST	LIF_LIFR_IL6ST	LIFR	LIF	LIFR_IL6ST					KEGG: hsa04060	Secreted Signaling	LIF - (LIFR+IL6ST)
IL19_IL20RA_IL20RB	IL19_IL20RA_IL20RB	IL10	IL19	IL20RA_IL20RB					KEGG: hsa04060	Secreted Signaling	IL19 - (IL20RA+IL20RB)
IL20_IL20RA_IL20RB	IL20_IL20RA_IL20RB	IL10	IL20	IL20RA_IL20RB					KEGG: hsa04060	Secreted Signaling	IL20 - (IL20RA+IL20RB)
IL24_IL20RA_IL20RB	IL24_IL20RA_IL20RB	IL10	IL24	IL20RA_IL20RB					KEGG: hsa04060	Secreted Signaling	IL24 - (IL20RA+IL20RB)
IL20_IL22RA1_IL20RB	IL20_IL22RA1_IL20RB	IL10	IL20	IL22RA1_IL20RB					KEGG: hsa04060	Secreted Signaling	IL20 - (IL22RA1+IL20RB)
IL24_IL22RA1_IL20RB	IL24_IL22RA1_IL20RB	IL10	IL24	IL22RA1_IL20RB					KEGG: hsa04060	Secreted Signaling	IL24 - (IL22RA1+IL20RB)
IL1A_IL1R1_IL1RAP	IL1A_IL1R1_IL1RAP	IL1	IL1A	IL1R1_IL1RAP		IL antagonist			KEGG: hsa04060	Secreted Signaling	IL1A - (IL1R1+IL1RAP)
IL1B_IL1R1_IL1RAP	IL1B_IL1R1_IL1RAP	IL1	IL1B	IL1R1_IL1RAP		IL antagonist			KEGG: hsa04060	Secreted Signaling	IL1B - (IL1R1+IL1RAP)
IL1A_IL1R2	IL1A_IL1R2	IL1	IL1A	IL1R2					KEGG: hsa04060	Secreted Signaling	IL1A - IL1R2
IL1B_IL1R2	IL1B_IL1R2	IL1	IL1B	IL1R2					KEGG: hsa04060	Secreted Signaling	IL1B - IL1R2
IL18_IL18R1_IL18RAP	IL18_IL18R1_IL18RAP	IL1	IL18	IL18R1_IL18RAP					KEGG: hsa04060	Secreted Signaling	IL18 - (IL18R1+IL18RAP)
IL33_IL1RL1_IL1RAP	IL33_IL1RL1_IL1RAP	IL1	IL33	IL1RL1_IL1RAP					KEGG: hsa04060	Secreted Signaling	IL33 - (IL1RL1+IL1RAP)
IL17B_IL17RB	IL17B_IL17RB	IL17	IL17B	IL17RB					KEGG: hsa04060	Secreted Signaling	IL17B - IL17RB
CSF1_CSF1R	CSF1_CSF1R	CSF	CSF1	CSF1R					KEGG: hsa04060	Secreted Signaling	CSF1 - CSF1R
IL16_CD4	IL16_CD4	IL16	IL16	CD4					KEGG: hsa04060	Secreted Signaling	IL16 - CD4
PRL_PRLR	PRL_PRLR	PRL	PRL	PRLR					KEGG: hsa04060; PMID: 23192981	Secreted Signaling	PRL - PRLR
IFNB1_IFNAR1_IFNAR2	IFNB1_IFNAR1_IFNAR2	IFN-I	IFNB1	IFNAR1_IFNAR2					KEGG: hsa04060	Secreted Signaling	IFNB1 - (IFNAR1+IFNAR2)
IFNE_IFNAR1_IFNAR2	IFNE_IFNAR1_IFNAR2	IFN-I	IFNE	IFNAR1_IFNAR2					KEGG: hsa04060	Secreted Signaling	IFNE - (IFNAR1+IFNAR2)
LTA_TNFRSF1A	LTA_TNFRSF1A	LT	LTA	TNFRSF1A					KEGG: hsa04060	Secreted Signaling	LTA - TNFRSF1A
LTA_TNFRSF1B	LTA_TNFRSF1B	LT	LTA	TNFRSF1B					KEGG: hsa04060	Secreted Signaling	LTA - TNFRSF1B
LTA_TNFRSF14	LTA_TNFRSF14	LT	LTA	TNFRSF14					KEGG: hsa04060	Secreted Signaling	LTA - TNFRSF14
LTA_LTB_LTBR	LTA_LTB_LTBR	LT	LTa1b2	LTBR					PMID: 24248355	Secreted Signaling	LTA - (LTB+LTBR)
TNFSF14_LTBR	TNFSF14_LTBR	LIGHT	TNFSF14	LTBR					KEGG: hsa04060	Secreted Signaling	TNFSF14 - LTBR
TNFSF14_TNFRSF14	TNFSF14_TNFRSF14	LIGHT	TNFSF14	TNFRSF14					KEGG: hsa04060	Secreted Signaling	TNFSF14 - TNFRSF14
TNFSF10_TNFRSF10B	TNFSF10_TNFRSF10B	TRAIL	TNFSF10	TNFRSF10A					KEGG: hsa04060	Secreted Signaling	TNFSF10 - TNFRSF10B
EDA_EDA2R	EDA_EDA2R	EDA	EDA	EDA2R					KEGG: hsa04060	Secreted Signaling	EDA - EDA2R
NGF_NGFR	NGF_NGFR	NGF	NGF	NGFR					KEGG: hsa04060	Secreted Signaling	NGF - NGFR
TNFSF12_TNFRSF12A	TNFSF12_TNFRSF12A	TWEAK	TNFSF12	TNFRSF12A					KEGG: hsa04060	Secreted Signaling	TNFSF12 - TNFRSF12A
TNFSF9_TNFRSF9	TNFSF9_TNFRSF9	CD137	TNFSF9	TNFRSF9					KEGG: hsa04060	Secreted Signaling	TNFSF9 - TNFRSF9
TNFSF13B_TNFRSF17	TNFSF13B_TNFRSF17	BAFF	TNFSF13B	TNFRSF17					KEGG: hsa04060	Secreted Signaling	TNFSF13B - TNFRSF17
SPP1_CD44	SPP1_CD44	SPP1	SPP1	CD44					PMID: 21907263	Secreted Signaling	SPP1 - CD44
SPP1_ITGAV_ITGB3	SPP1_ITGAV_ITGB3	SPP1	SPP1	ITGAV_ITGB3					PMID: 21907263	Secreted Signaling	SPP1 - (ITGAV+ITGB3)
SPP1_ITGAV_ITGB1	SPP1_ITGAV_ITGB1	SPP1	SPP1	ITGAV_ITGB1					PMID: 21907263	Secreted Signaling	SPP1 - (ITGAV+ITGB1)
SPP1_ITGAV_ITGB5	SPP1_ITGAV_ITGB5	SPP1	SPP1	ITGAV_ITGB5					PMID: 21907263	Secreted Signaling	SPP1 - (ITGAV+ITGB5)
SPP1_ITGAV_ITGB6	SPP1_ITGAV_ITGB6	SPP1	SPP1	ITGAV_ITGB6					PMID: 21907263	Secreted Signaling	SPP1 - (ITGAV+ITGB6)
SPP1_ITGA4_ITGB1	SPP1_ITGA4_ITGB1	SPP1	SPP1	ITGA4_ITGB1					PMID: 21907263	Secreted Signaling	SPP1 - (ITGA4+ITGB1)
SPP1_ITGA9_ITGB1	SPP1_ITGA9_ITGB1	SPP1	SPP1	ITGA9_ITGB1					PMID: 21907263	Secreted Signaling	SPP1 - (ITGA9+ITGB1)
SPP1_ITGA8_ITGB1	SPP1_ITGA8_ITGB1	SPP1	SPP1	ITGA8_ITGB1					PMID: 21907263	Secreted Signaling	SPP1 - (ITGA8+ITGB1)
SPP1_ITGA5_ITGB1	SPP1_ITGA5_ITGB1	SPP1	SPP1	ITGA5_ITGB1					PMID: 21907263	Secreted Signaling	SPP1 - (ITGA5+ITGB1)
NAMPT_INSR	NAMPT_INSR	VISFATIN	NAMPT	INSR					PMID: 28490838	Secreted Signaling	NAMPT - INSR
NAMPT_ITGA5_ITGB1	NAMPT_ITGA5_ITGB1	VISFATIN	NAMPT	ITGA5_ITGB1					PMID: 28490838	Secreted Signaling	NAMPT - (ITGA5+ITGB1)
ANGPTL1_ITGA1_ITGB1	ANGPTL1_ITGA1_ITGB1	ANGPTL	ANGPTL1	ITGA1_ITGB1					PMID: 24478758	Secreted Signaling	ANGPTL1 - (ITGA1+ITGB1)
ANGPTL2_ITGA5_ITGB1	ANGPTL2_ITGA5_ITGB1	ANGPTL	ANGPTL2	ITGA5_ITGB1					PMID: 24478758	Secreted Signaling	ANGPTL2 - (ITGA5+ITGB1)
ANGPTL2_TLR4	ANGPTL2_TLR4	ANGPTL	ANGPTL2	TLR4					PMID: 24478758	Secreted Signaling	ANGPTL2 - TLR4
ANGPTL4_ITGA5_ITGB1	ANGPTL4_ITGA5_ITGB1	ANGPTL	ANGPTL4	ITGA5_ITGB1					PMID: 30049845	Secreted Signaling	ANGPTL4 - (ITGA5+ITGB1)
ANGPTL4_ITGAV_ITGB3	ANGPTL4_ITGAV_ITGB3	ANGPTL	ANGPTL4	ITGAV_ITGB3					PMID: 30049845	Secreted Signaling	ANGPTL4 - (ITGAV+ITGB3)
ANGPTL4_CDH11	ANGPTL4_CDH11	ANGPTL	ANGPTL4	CDH11					PMID: 30049845	Secreted Signaling	ANGPTL4 - CDH11
ANGPTL4_SDC1	ANGPTL4_SDC1	ANGPTL	ANGPTL4	SDC1					PMID: 29017031	Secreted Signaling	ANGPTL4 - SDC1
ANGPTL4_SDC2	ANGPTL4_SDC2	ANGPTL	ANGPTL4	SDC2					PMID: 29017031	Secreted Signaling	ANGPTL4 - SDC2
ANGPTL4_SDC3	ANGPTL4_SDC3	ANGPTL	ANGPTL4	SDC3					PMID: 29017031	Secreted Signaling	ANGPTL4 - SDC3
ANGPTL4_SDC4	ANGPTL4_SDC4	ANGPTL	ANGPTL4	SDC4					PMID: 29017031	Secreted Signaling	ANGPTL4 - SDC4
ANGPT1_TEK	ANGPT1_TEK	ANGPT	ANGPT1	TEK				ANGPT inhibition receptor 1	PMID: 20651738	Secreted Signaling	ANGPT1 - TEK
ANGPT2_TEK	ANGPT2_TEK	ANGPT	ANGPT2	TEK				ANGPT inhibition receptor 1	PMID: 20651738	Secreted Signaling	ANGPT2 - TEK
ANGPT2_ITGA5_ITGB1	ANGPT2_ITGA5_ITGB1	ANGPT	ANGPT2	ITGA5_ITGB1				ANGPT inhibition receptor 2	PMID: 20651738; PMID: 25635707	Secreted Signaling	ANGPT2 - (ITGA5+ITGB1)
MDK_SDC1	MDK_SDC1	MK	MDK	SDC1					PMID: 28356350	Secreted Signaling	MDK - SDC1
MDK_SDC2	MDK_SDC2	MK	MDK	SDC2					PMID: 28356350	Secreted Signaling	MDK - SDC2
MDK_SDC4	MDK_SDC4	MK	MDK	SDC4					PMID: 28356350	Secreted Signaling	MDK - SDC4
MDK_ITGA4_ITGB1	MDK_ITGA4_ITGB1	MK	MDK	ITGA4_ITGB1					PMID: 28356350	Secreted Signaling	MDK - (ITGA4+ITGB1)
MDK_ITGA6_ITGB1	MDK_ITGA6_ITGB1	MK	MDK	ITGA6_ITGB1					PMID: 28356350	Secreted Signaling	MDK - (ITGA6+ITGB1)
MDK_LRP1	MDK_LRP1	MK	MDK	LRP1					PMID: 28356350	Secreted Signaling	MDK - LRP1
MDK_NCL	MDK_NCL	MK	MDK	NCL					PMID: 28356350	Secreted Signaling	MDK - NCL
PTN_SDC1	PTN_SDC1	PTN	PTN	SDC1					PMID: 28356350; PMID: 25620911	Secreted Signaling	PTN - SDC1
PTN_SDC2	PTN_SDC2	PTN	PTN	SDC2					PMID: 28356350; PMID: 25620911	Secreted Signaling	PTN - SDC2
PTN_SDC3	PTN_SDC3	PTN	PTN	SDC3					PMID: 28356350; PMID: 25620911	Secreted Signaling	PTN - SDC3
PTN_SDC4	PTN_SDC4	PTN	PTN	SDC4					PMID: 28356350; PMID: 25620911	Secreted Signaling	PTN - SDC4
PTN_ITGAV_ITGB3	PTN_ITGAV_ITGB3	PTN	PTN	ITGAV_ITGB3					PMID: 28356350; PMID: 25620911	Secreted Signaling	PTN - (ITGAV+ITGB3)
PTN_NCL	PTN_NCL	PTN	PTN	NCL					PMID: 28356350; PMID: 25620911	Secreted Signaling	PTN - NCL
POSTN_ITGAV_ITGB3	POSTN_ITGAV_ITGB3	PERIOSTIN	POSTN	ITGAV_ITGB3					PMID: 26721738	Secreted Signaling	POSTN - (ITGAV+ITGB3)
POSTN_ITGAV_ITGB5	POSTN_ITGAV_ITGB5	PERIOSTIN	POSTN	ITGAV_ITGB5					PMID: 26721738	Secreted Signaling	POSTN - (ITGAV+ITGB5)
AGT_AGTR1B	AGT_AGTR1B	AGT	AGT	AGTR1					KEGG: hsa04080	Secreted Signaling	AGT - AGTR1B
NMB_NMBR	NMB_NMBR	GPR	NMB	NMBR					KEGG: hsa04080	Secreted Signaling	NMB - NMBR
C3_ITGAM_ITGB2	C3_ITGAM_ITGB2	COMPLEMENT	C3	ITGAM_ITGB2					PMID: 16234578	Secreted Signaling	C3 - (ITGAM+ITGB2)
C3_ITGAX_ITGB2	C3_ITGAX_ITGB2	COMPLEMENT	C3	ITGAX_ITGB2					PMID: 16234578	Secreted Signaling	C3 - (ITGAX+ITGB2)
EDN1_EDNRA	EDN1_EDNRA	EDN	EDN1	EDNRA					KEGG: hsa04080	Secreted Signaling	EDN1 - EDNRA
EDN1_EDNRB	EDN1_EDNRB	EDN	EDN1	EDNRB					KEGG: hsa04080	Secreted Signaling	EDN1 - EDNRB
POMC_MC1R	POMC_MC1R	MELANOCORTIN	POMC	MC1R					KEGG: hsa04080	Secreted Signaling	POMC - MC1R
NPY_GPR83	NPY_GPR83	NPY	NPY	GPR83					KEGG: hsa04080	Secreted Signaling	NPY - GPR83
PENK_OPRL1	PENK_OPRL1	OPIOID	PENK	OPRL1					KEGG: hsa04080	Secreted Signaling	PENK - OPRL1
POMC_OPRL1	POMC_OPRL1	OPIOID	POMC	OPRL1					KEGG: hsa04080	Secreted Signaling	POMC - OPRL1
OXT_OXTR	OXT_OXTR	OXT	OXT	OXTR					KEGG: hsa04080	Secreted Signaling	OXT - OXTR
CORT_SSTR1	CORT_SSTR1	SOMATOSTATIN	CORT	SSTR1					KEGG: hsa04080	Secreted Signaling	CORT - SSTR1
CORT_SSTR2	CORT_SSTR2	SOMATOSTATIN	CORT	SSTR2					KEGG: hsa04080	Secreted Signaling	CORT - SSTR2
CORT_SSTR3	CORT_SSTR3	SOMATOSTATIN	CORT	SSTR3					KEGG: hsa04080	Secreted Signaling	CORT - SSTR3
F2_F2R	F2_F2R	PARs	F2	F2R					KEGG: hsa04080	Secreted Signaling	F2 - F2R
GZMA_F2R	GZMA_F2R	PARs	GZMA	F2R					KEGG: hsa04080	Secreted Signaling	GZMA - F2R
F2_F2RL1	F2_F2RL1	PARs	F2	F2RL1					KEGG: hsa04080	Secreted Signaling	F2 - F2RL1
GZMA_F2RL1	GZMA_F2RL1	PARs	GZMA	F2RL1					KEGG: hsa04080	Secreted Signaling	GZMA - F2RL1
F2_F2RL2	F2_F2RL2	PARs	F2	F2RL2					KEGG: hsa04080	Secreted Signaling	F2 - F2RL2
GZMA_F2RL2	GZMA_F2RL2	PARs	GZMA	F2RL2					KEGG: hsa04080	Secreted Signaling	GZMA - F2RL2
F2_F2RL3	F2_F2RL3	PARs	F2	F2RL3					KEGG: hsa04080	Secreted Signaling	F2 - F2RL3
GZMA_F2RL3	GZMA_F2RL3	PARs	GZMA	F2RL3					KEGG: hsa04080	Secreted Signaling	GZMA - F2RL3
F2_PARD3	F2_PARD3	PARs	F2	PARD3					KEGG: hsa04080	Secreted Signaling	F2 - PARD3
GZMA_PARD3	GZMA_PARD3	PARs	GZMA	PARD3					KEGG: hsa04080	Secreted Signaling	GZMA - PARD3
NPPC_NPR2	NPPC_NPR2	NPR2	NPPC	NPR2					KEGG: hsa04080; PMID: 29934642	Secreted Signaling	NPPC - NPR2
KITL_KIT	KITL_KIT	KIT	KITLG	KIT					KEGG: hsa04080	Secreted Signaling	KITL - KIT
GIP_GIPR	GIP_GIPR	GIPR	GIP	GIPR					KEGG: hsa04080	Secreted Signaling	GIP - GIPR
BDNF_NTRK2	BDNF_NTRK2	NT	BDNF	NTRK2			NGFR activation receptor		PMID: 27908981	Secreted Signaling	BDNF - NTRK2
HGF_MET	HGF_MET	HGF	HGF	MET					PMID: 28475121	Secreted Signaling	HGF - MET
NTF3_NTRK2	NTF3_NTRK2	NT	NTF3	NTRK2			NGFR activation receptor		PMID: 27908981	Secreted Signaling	NTF3 - NTRK2
NTF3_NTRK3	NTF3_NTRK3	NT	NTF3	NTRK3			NGFR activation receptor		PMID: 27908981	Secreted Signaling	NTF3 - NTRK3
SEMA3A_NRP1_PLXNA1	SEMA3A_NRP1_PLXNA1	SEMA3	SEMA3A	NRP1_PLXNA1					PMID: 27533782	Secreted Signaling	SEMA3A - (NRP1+PLXNA1)
SEMA3A_NRP1_PLXNA2	SEMA3A_NRP1_PLXNA2	SEMA3	SEMA3A	NRP1_PLXNA2					PMID: 27533782	Secreted Signaling	SEMA3A - (NRP1+PLXNA2)
SEMA3A_NRP1_PLXNA3	SEMA3A_NRP1_PLXNA3	SEMA3	SEMA3A	NRP1_PLXNA3					PMID: 27533782	Secreted Signaling	SEMA3A - (NRP1+PLXNA3)
SEMA3A_NRP1_PLXNA4	SEMA3A_NRP1_PLXNA4	SEMA3	SEMA3A	NRP1_PLXNA4					PMID: 27533782	Secreted Signaling	SEMA3A - (NRP1+PLXNA4)
SEMA3B_NRP1_PLXNA1	SEMA3B_NRP1_PLXNA1	SEMA3	SEMA3B	NRP1_PLXNA1					PMID: 27533782	Secreted Signaling	SEMA3B - (NRP1+PLXNA1)
SEMA3B_NRP1_PLXNA2	SEMA3B_NRP1_PLXNA2	SEMA3	SEMA3B	NRP1_PLXNA2					PMID: 27533782	Secreted Signaling	SEMA3B - (NRP1+PLXNA2)
SEMA3B_NRP1_PLXNA3	SEMA3B_NRP1_PLXNA3	SEMA3	SEMA3B	NRP1_PLXNA3					PMID: 27533782	Secreted Signaling	SEMA3B - (NRP1+PLXNA3)
SEMA3B_NRP1_PLXNA4	SEMA3B_NRP1_PLXNA4	SEMA3	SEMA3B	NRP1_PLXNA4					PMID: 27533782	Secreted Signaling	SEMA3B - (NRP1+PLXNA4)
SEMA3C_NRP1_PLXNA1	SEMA3C_NRP1_PLXNA1	SEMA3	SEMA3C	NRP1_PLXNA1					PMID: 27533782	Secreted Signaling	SEMA3C - (NRP1+PLXNA1)
SEMA3C_NRP1_PLXNA2	SEMA3C_NRP1_PLXNA2	SEMA3	SEMA3C	NRP1_PLXNA2					PMID: 27533782	Secreted Signaling	SEMA3C - (NRP1+PLXNA2)
SEMA3C_NRP1_PLXNA3	SEMA3C_NRP1_PLXNA3	SEMA3	SEMA3C	NRP1_PLXNA3					PMID: 27533782	Secreted Signaling	SEMA3C - (NRP1+PLXNA3)
SEMA3C_NRP1_PLXNA4	SEMA3C_NRP1_PLXNA4	SEMA3	SEMA3C	NRP1_PLXNA4					PMID: 27533782	Secreted Signaling	SEMA3C - (NRP1+PLXNA4)
SEMA3D_NRP1_PLXNA1	SEMA3D_NRP1_PLXNA1	SEMA3	SEMA3D	NRP1_PLXNA1					PMID: 27533782	Secreted Signaling	SEMA3D - (NRP1+PLXNA1)
SEMA3D_NRP1_PLXNA2	SEMA3D_NRP1_PLXNA2	SEMA3	SEMA3D	NRP1_PLXNA2					PMID: 27533782	Secreted Signaling	SEMA3D - (NRP1+PLXNA2)
SEMA3D_NRP1_PLXNA3	SEMA3D_NRP1_PLXNA3	SEMA3	SEMA3D	NRP1_PLXNA3					PMID: 27533782	Secreted Signaling	SEMA3D - (NRP1+PLXNA3)
SEMA3D_NRP1_PLXNA4	SEMA3D_NRP1_PLXNA4	SEMA3	SEMA3D	NRP1_PLXNA4					PMID: 27533782	Secreted Signaling	SEMA3D - (NRP1+PLXNA4)
SEMA3B_NRP2_PLXNA1	SEMA3B_NRP2_PLXNA1	SEMA3	SEMA3B	NRP2_PLXNA1					PMID: 27533782	Secreted Signaling	SEMA3B - (NRP2+PLXNA1)
SEMA3B_NRP2_PLXNA2	SEMA3B_NRP2_PLXNA2	SEMA3	SEMA3B	NRP2_PLXNA2					PMID: 27533782	Secreted Signaling	SEMA3B - (NRP2+PLXNA2)
SEMA3B_NRP2_PLXNA3	SEMA3B_NRP2_PLXNA3	SEMA3	SEMA3B	NRP2_PLXNA3					PMID: 27533782	Secreted Signaling	SEMA3B - (NRP2+PLXNA3)
SEMA3B_NRP2_PLXNA4	SEMA3B_NRP2_PLXNA4	SEMA3	SEMA3B	NRP2_PLXNA4					PMID: 27533782	Secreted Signaling	SEMA3B - (NRP2+PLXNA4)
SEMA3C_NRP2_PLXNA1	SEMA3C_NRP2_PLXNA1	SEMA3	SEMA3C	NRP2_PLXNA1					PMID: 27533782	Secreted Signaling	SEMA3C - (NRP2+PLXNA1)
SEMA3C_NRP2_PLXNA2	SEMA3C_NRP2_PLXNA2	SEMA3	SEMA3C	NRP2_PLXNA2					PMID: 27533782	Secreted Signaling	SEMA3C - (NRP2+PLXNA2)
SEMA3C_NRP2_PLXNA3	SEMA3C_NRP2_PLXNA3	SEMA3	SEMA3C	NRP2_PLXNA3					PMID: 27533782	Secreted Signaling	SEMA3C - (NRP2+PLXNA3)
SEMA3C_NRP2_PLXNA4	SEMA3C_NRP2_PLXNA4	SEMA3	SEMA3C	NRP2_PLXNA4					PMID: 27533782	Secreted Signaling	SEMA3C - (NRP2+PLXNA4)
SEMA3D_NRP2_PLXNA1	SEMA3D_NRP2_PLXNA1	SEMA3	SEMA3D	NRP2_PLXNA1					PMID: 27533782	Secreted Signaling	SEMA3D - (NRP2+PLXNA1)
SEMA3D_NRP2_PLXNA2	SEMA3D_NRP2_PLXNA2	SEMA3	SEMA3D	NRP2_PLXNA2					PMID: 27533782	Secreted Signaling	SEMA3D - (NRP2+PLXNA2)
SEMA3D_NRP2_PLXNA3	SEMA3D_NRP2_PLXNA3	SEMA3	SEMA3D	NRP2_PLXNA3					PMID: 27533782	Secreted Signaling	SEMA3D - (NRP2+PLXNA3)
SEMA3D_NRP2_PLXNA4	SEMA3D_NRP2_PLXNA4	SEMA3	SEMA3D	NRP2_PLXNA4					PMID: 27533782	Secreted Signaling	SEMA3D - (NRP2+PLXNA4)
SEMA3F_NRP2_PLXNA1	SEMA3F_NRP2_PLXNA1	SEMA3	SEMA3F	NRP2_PLXNA1					PMID: 27533782	Secreted Signaling	SEMA3F - (NRP2+PLXNA1)
SEMA3F_NRP2_PLXNA2	SEMA3F_NRP2_PLXNA2	SEMA3	SEMA3F	NRP2_PLXNA2					PMID: 27533782	Secreted Signaling	SEMA3F - (NRP2+PLXNA2)
SEMA3F_NRP2_PLXNA3	SEMA3F_NRP2_PLXNA3	SEMA3	SEMA3F	NRP2_PLXNA3					PMID: 27533782	Secreted Signaling	SEMA3F - (NRP2+PLXNA3)
SEMA3F_NRP2_PLXNA4	SEMA3F_NRP2_PLXNA4	SEMA3	SEMA3F	NRP2_PLXNA4					PMID: 27533782	Secreted Signaling	SEMA3F - (NRP2+PLXNA4)
SEMA3C_NRP1_NRP2	SEMA3C_NRP1_NRP2	SEMA3	SEMA3C	NRP1_NRP2					PMID: 27533782	Secreted Signaling	SEMA3C - (NRP1+NRP2)
SEMA3C_PLXND1	SEMA3C_PLXND1	SEMA3	SEMA3C	PLXND1					PMID: 27533782	Secreted Signaling	SEMA3C - PLXND1
SEMA3E_PLXND1	SEMA3E_PLXND1	SEMA3	SEMA3E	PLXND1					PMID: 22325954	Secreted Signaling	SEMA3E - PLXND1
ADM_CALCRL	ADM_CALCRL	CALCR	ADM	CALCRL					KEGG: hsa04080	Secreted Signaling	ADM - CALCRL
ANXA1_FPR2	ANXA1_FPR2	ANNEXIN	ANXA1	FPR2					PMID: 23230437	Secreted Signaling	ANXA1 - FPR2
ANXA1_FPR1	ANXA1_FPR1	ANNEXIN	ANXA1	FPR1					PMID: 23230437	Secreted Signaling	ANXA1 - FPR1
ENHO_GPR19	ENHO_GPR19	ENHO	ENHO	GPR19					PMID: 28476646	Secreted Signaling	ENHO - GPR19
GAS6_AXL	GAS6_AXL	GAS	GAS6	AXL					PMID: 27801848	Secreted Signaling	GAS6 - AXL
GAS6_TYRO3	GAS6_TYRO3	GAS	GAS6	TYRO3					PMID: 27801848	Secreted Signaling	GAS6 - TYRO3
GRN_SORT1	GRN_SORT1	GRN	GRN	SORT1					PMID: 29555433	Secreted Signaling	GRN - SORT1
LEP_LEPR	LEP_LEPR	LEP	LEP	LEPR					KEGG: hsa04080	Secreted Signaling	LEP - LEPR
OSTN_NPR3	OSTN_NPR3	OSTN	OSTN	NPR3					PMID: 29326144	Secreted Signaling	OSTN - NPR3
PROS1_AXL	PROS1_AXL	PROS	PROS1	AXL					PMID: 29531161	Secreted Signaling	PROS1 - AXL
PROS1_TYRO3	PROS1_TYRO3	PROS	PROS1	TYRO3					PMID: 30501104	Secreted Signaling	PROS1 - TYRO3
PSAP_GPR37	PSAP_GPR37	PSAP	PSAP	GPR37					PMID: 23690594	Secreted Signaling	PSAP - GPR37
RARRES2_GPR1	RARRES2_GPR1	CHEMERIN	RARRES2	GPR1					PMID: 24671882	Secreted Signaling	RARRES2 - GPR1
RARRES2_CMKLR1	RARRES2_CMKLR1	CHEMERIN	RARRES2	CMKLR1					PMID: 24671882	Secreted Signaling	RARRES2 - CMKLR1
SAA1_FPR2	SAA1_FPR2	SAA	SAA1	FPR2					PMID: 22610094	Secreted Signaling	SAA1 - FPR2
BAG6_NCR3-PS	BAG6_NCR3-PS	BAG	BAG6	NCR3					PMID: 30021652	Secreted Signaling	BAG6 - NCR3-PS
LGALS9_HAVCR2	LGALS9_HAVCR2	GALECTIN	LGALS9	HAVCR2					PMID: 27192565	Secreted Signaling	LGALS9 - HAVCR2
LGALS9_CD44	LGALS9_CD44	GALECTIN	LGALS9	CD44					PMID: 25065622	Secreted Signaling	LGALS9 - CD44
ligand-Receptor analysis of Sample Ef
TGFB1_TGFBR1_TGFBR2	TGFB1_TGFBR1_TGFBR2	TGFb	TGFB1	TGFbR1_R2	TGFb agonist	TGFb antagonist		TGFb inhibition receptor	KEGG: hsa04350	Secreted Signaling	TGFB1 - (TGFBR1+TGFBR2)
TGFB2_TGFBR1_TGFBR2	TGFB2_TGFBR1_TGFBR2	TGFb	TGFB2	TGFbR1_R2	TGFb agonist	TGFb antagonist		TGFb inhibition receptor	KEGG: hsa04350	Secreted Signaling	TGFB2 - (TGFBR1+TGFBR2)
TGFB1_ACVR1B_TGFBR2	TGFB1_ACVR1B_TGFBR2	TGFb	TGFB1	ACVR1B_TGFbR2	TGFb agonist	TGFb antagonist		TGFb inhibition receptor	PMID: 27449815	Secreted Signaling	TGFB1 - (ACVR1B+TGFBR2)
TGFB1_ACVR1C_TGFBR2	TGFB1_ACVR1C_TGFBR2	TGFb	TGFB1	ACVR1C_TGFbR2	TGFb agonist	TGFb antagonist		TGFb inhibition receptor	PMID: 27449815	Secreted Signaling	TGFB1 - (ACVR1C+TGFBR2)
TGFB2_ACVR1B_TGFBR2	TGFB2_ACVR1B_TGFBR2	TGFb	TGFB2	ACVR1B_TGFbR2	TGFb agonist	TGFb antagonist		TGFb inhibition receptor	PMID: 27449815	Secreted Signaling	TGFB2 - (ACVR1B+TGFBR2)
TGFB2_ACVR1C_TGFBR2	TGFB2_ACVR1C_TGFBR2	TGFb	TGFB2	ACVR1C_TGFbR2	TGFb agonist	TGFb antagonist		TGFb inhibition receptor	PMID: 27449815	Secreted Signaling	TGFB2 - (ACVR1C+TGFBR2)
TGFB1_ACVR1_TGFBR1	TGFB1_ACVR1_TGFBR1	TGFb	TGFB1	ACVR1_TGFbR					PMID: 29376829	Secreted Signaling	TGFB1 - (ACVR1+TGFBR1)
TGFB2_ACVR1_TGFBR1	TGFB2_ACVR1_TGFBR1	TGFb	TGFB2	ACVR1_TGFbR					PMID: 29376829	Secreted Signaling	TGFB2 - (ACVR1+TGFBR1)
BMP2_BMPR1A_ACVR2A	BMP2_BMPR1A_ACVR2A	BMP	BMP2	BMPR1A_ACVR2A		BMP antagonist		BMP inhibition receptor	KEGG: hsa04350; PMID:26893264	Secreted Signaling	BMP2 - (BMPR1A+ACVR2A)
BMP2_BMPR1A_ACVR2B	BMP2_BMPR1A_ACVR2B	BMP	BMP2	BMPR1A_ACVR2B		BMP antagonist		BMP inhibition receptor	KEGG: hsa04350; PMID:26893264	Secreted Signaling	BMP2 - (BMPR1A+ACVR2B)
BMP2_BMPR1A_BMPR2	BMP2_BMPR1A_BMPR2	BMP	BMP2	BMPR1A_BMPR2		BMP antagonist		BMP inhibition receptor	KEGG: hsa04350; PMID:26893264	Secreted Signaling	BMP2 - (BMPR1A+BMPR2)
BMP2_BMPR1B_ACVR2A	BMP2_BMPR1B_ACVR2A	BMP	BMP2	BMPR1B_ACVR2A		BMP antagonist		BMP inhibition receptor	KEGG: hsa04350; PMID:26893264	Secreted Signaling	BMP2 - (BMPR1B+ACVR2A)
BMP2_BMPR1B_ACVR2B	BMP2_BMPR1B_ACVR2B	BMP	BMP2	BMPR1B_ACVR2B		BMP antagonist		BMP inhibition receptor	KEGG: hsa04350; PMID:26893264	Secreted Signaling	BMP2 - (BMPR1B+ACVR2B)
BMP2_BMPR1B_BMPR2	BMP2_BMPR1B_BMPR2	BMP	BMP2	BMPR1B_BMPR2		BMP antagonist		BMP inhibition receptor	KEGG: hsa04350; PMID:26893264	Secreted Signaling	BMP2 - (BMPR1B+BMPR2)
BMP4_BMPR1A_ACVR2A	BMP4_BMPR1A_ACVR2A	BMP	BMP4	BMPR1A_ACVR2A		BMP antagonist		BMP inhibition receptor	KEGG: hsa04350; PMID:26893264	Secreted Signaling	BMP4 - (BMPR1A+ACVR2A)
BMP4_BMPR1A_ACVR2B	BMP4_BMPR1A_ACVR2B	BMP	BMP4	BMPR1A_ACVR2B		BMP antagonist		BMP inhibition receptor	KEGG: hsa04350; PMID:26893264	Secreted Signaling	BMP4 - (BMPR1A+ACVR2B)
BMP4_BMPR1A_BMPR2	BMP4_BMPR1A_BMPR2	BMP	BMP4	BMPR1A_BMPR2		BMP antagonist		BMP inhibition receptor	KEGG: hsa04350; PMID:26893264	Secreted Signaling	BMP4 - (BMPR1A+BMPR2)
BMP4_BMPR1B_ACVR2A	BMP4_BMPR1B_ACVR2A	BMP	BMP4	BMPR1B_ACVR2A		BMP antagonist		BMP inhibition receptor	KEGG: hsa04350; PMID:26893264	Secreted Signaling	BMP4 - (BMPR1B+ACVR2A)
BMP4_BMPR1B_ACVR2B	BMP4_BMPR1B_ACVR2B	BMP	BMP4	BMPR1B_ACVR2B		BMP antagonist		BMP inhibition receptor	KEGG: hsa04350; PMID:26893264	Secreted Signaling	BMP4 - (BMPR1B+ACVR2B)
BMP4_BMPR1B_BMPR2	BMP4_BMPR1B_BMPR2	BMP	BMP4	BMPR1B_BMPR2		BMP antagonist		BMP inhibition receptor	KEGG: hsa04350; PMID:26893264	Secreted Signaling	BMP4 - (BMPR1B+BMPR2)
GDF5_BMPR1A_ACVR2A	GDF5_BMPR1A_ACVR2A	BMP	GDF5	BMPR1A_ACVR2A		BMP antagonist		BMP inhibition receptor	KEGG: hsa04350; PMID:26893264	Secreted Signaling	GDF5 - (BMPR1A+ACVR2A)
GDF5_BMPR1A_ACVR2B	GDF5_BMPR1A_ACVR2B	BMP	GDF5	BMPR1A_ACVR2B		BMP antagonist		BMP inhibition receptor	KEGG: hsa04350; PMID:26893264	Secreted Signaling	GDF5 - (BMPR1A+ACVR2B)
GDF5_BMPR1A_BMPR2	GDF5_BMPR1A_BMPR2	BMP	GDF5	BMPR1A_BMPR2		BMP antagonist		BMP inhibition receptor	KEGG: hsa04350; PMID:26893264	Secreted Signaling	GDF5 - (BMPR1A+BMPR2)
GDF5_BMPR1B_ACVR2A	GDF5_BMPR1B_ACVR2A	BMP	GDF5	BMPR1B_ACVR2A		BMP antagonist		BMP inhibition receptor	KEGG: hsa04350; PMID:26893264	Secreted Signaling	GDF5 - (BMPR1B+ACVR2A)
GDF5_BMPR1B_ACVR2B	GDF5_BMPR1B_ACVR2B	BMP	GDF5	BMPR1B_ACVR2B		BMP antagonist		BMP inhibition receptor	KEGG: hsa04350; PMID:26893264	Secreted Signaling	GDF5 - (BMPR1B+ACVR2B)
GDF5_BMPR1B_BMPR2	GDF5_BMPR1B_BMPR2	BMP	GDF5	BMPR1B_BMPR2		BMP antagonist		BMP inhibition receptor	KEGG: hsa04350; PMID:26893264	Secreted Signaling	GDF5 - (BMPR1B+BMPR2)
GDF6_BMPR1A_ACVR2A	GDF6_BMPR1A_ACVR2A	BMP	GDF6	BMPR1A_ACVR2A		BMP antagonist		BMP inhibition receptor	KEGG: hsa04350; PMID:26893264	Secreted Signaling	GDF6 - (BMPR1A+ACVR2A)
GDF6_BMPR1A_ACVR2B	GDF6_BMPR1A_ACVR2B	BMP	GDF6	BMPR1A_ACVR2B		BMP antagonist		BMP inhibition receptor	KEGG: hsa04350; PMID:26893264	Secreted Signaling	GDF6 - (BMPR1A+ACVR2B)
GDF6_BMPR1A_BMPR2	GDF6_BMPR1A_BMPR2	BMP	GDF6	BMPR1A_BMPR2		BMP antagonist		BMP inhibition receptor	KEGG: hsa04350; PMID:26893264	Secreted Signaling	GDF6 - (BMPR1A+BMPR2)
GDF6_BMPR1B_ACVR2A	GDF6_BMPR1B_ACVR2A	BMP	GDF6	BMPR1B_ACVR2A		BMP antagonist		BMP inhibition receptor	KEGG: hsa04350; PMID:26893264	Secreted Signaling	GDF6 - (BMPR1B+ACVR2A)
GDF6_BMPR1B_ACVR2B	GDF6_BMPR1B_ACVR2B	BMP	GDF6	BMPR1B_ACVR2B		BMP antagonist		BMP inhibition receptor	KEGG: hsa04350; PMID:26893264	Secreted Signaling	GDF6 - (BMPR1B+ACVR2B)
GDF6_BMPR1B_BMPR2	GDF6_BMPR1B_BMPR2	BMP	GDF6	BMPR1B_BMPR2		BMP antagonist		BMP inhibition receptor	KEGG: hsa04350; PMID:26893264	Secreted Signaling	GDF6 - (BMPR1B+BMPR2)
BMP6_ACVR1_ACVR2A	BMP6_ACVR1_ACVR2A	BMP	BMP6	ACVR1_ACVR2A		BMP antagonist		BMP inhibition receptor	KEGG: hsa04350; PMID:26893264	Secreted Signaling	BMP6 - (ACVR1+ACVR2A)
BMP6_ACVR1_ACVR2B	BMP6_ACVR1_ACVR2B	BMP	BMP6	ACVR1_ACVR2B		BMP antagonist		BMP inhibition receptor	KEGG: hsa04350; PMID:26893264	Secreted Signaling	BMP6 - (ACVR1+ACVR2B)
BMP6_ACVR1_BMPR2	BMP6_ACVR1_BMPR2	BMP	BMP6	ACVR1_BMPR2		BMP antagonist		BMP inhibition receptor	KEGG: hsa04350; PMID:26893264	Secreted Signaling	BMP6 - (ACVR1+BMPR2)
BMP6_BMPR1A_ACVR2A	BMP6_BMPR1A_ACVR2A	BMP	BMP6	BMPR1A_ACVR2A		BMP antagonist		BMP inhibition receptor	KEGG: hsa04350; PMID:26893264	Secreted Signaling	BMP6 - (BMPR1A+ACVR2A)
BMP6_BMPR1A_ACVR2B	BMP6_BMPR1A_ACVR2B	BMP	BMP6	BMPR1A_ACVR2B		BMP antagonist		BMP inhibition receptor	KEGG: hsa04350; PMID:26893264	Secreted Signaling	BMP6 - (BMPR1A+ACVR2B)
BMP6_BMPR1A_BMPR2	BMP6_BMPR1A_BMPR2	BMP	BMP6	BMPR1A_BMPR2		BMP antagonist		BMP inhibition receptor	KEGG: hsa04350; PMID:26893264	Secreted Signaling	BMP6 - (BMPR1A+BMPR2)
BMP6_BMPR1B_ACVR2A	BMP6_BMPR1B_ACVR2A	BMP	BMP6	BMPR1B_ACVR2A		BMP antagonist		BMP inhibition receptor	KEGG: hsa04350; PMID:26893264	Secreted Signaling	BMP6 - (BMPR1B+ACVR2A)
BMP6_BMPR1B_ACVR2B	BMP6_BMPR1B_ACVR2B	BMP	BMP6	BMPR1B_ACVR2B		BMP antagonist		BMP inhibition receptor	KEGG: hsa04350; PMID:26893264	Secreted Signaling	BMP6 - (BMPR1B+ACVR2B)
BMP6_BMPR1B_BMPR2	BMP6_BMPR1B_BMPR2	BMP	BMP6	BMPR1B_BMPR2		BMP antagonist		BMP inhibition receptor	KEGG: hsa04350; PMID:26893264	Secreted Signaling	BMP6 - (BMPR1B+BMPR2)
BMP8A_ACVR1_ACVR2A	BMP8A_ACVR1_ACVR2A	BMP	BMP8A	ACVR1_ACVR2A		BMP antagonist		BMP inhibition receptor	KEGG: hsa04350; PMID:26893264	Secreted Signaling	BMP8A - (ACVR1+ACVR2A)
BMP8A_ACVR1_ACVR2B	BMP8A_ACVR1_ACVR2B	BMP	BMP8A	ACVR1_ACVR2B		BMP antagonist		BMP inhibition receptor	KEGG: hsa04350; PMID:26893264	Secreted Signaling	BMP8A - (ACVR1+ACVR2B)
BMP8A_ACVR1_BMPR2	BMP8A_ACVR1_BMPR2	BMP	BMP8A	ACVR1_BMPR2		BMP antagonist		BMP inhibition receptor	KEGG: hsa04350; PMID:26893264	Secreted Signaling	BMP8A - (ACVR1+BMPR2)
BMP8A_BMPR1A_ACVR2A	BMP8A_BMPR1A_ACVR2A	BMP	BMP8A	BMPR1A_ACVR2A		BMP antagonist		BMP inhibition receptor	KEGG: hsa04350; PMID:26893264	Secreted Signaling	BMP8A - (BMPR1A+ACVR2A)
BMP8A_BMPR1A_ACVR2B	BMP8A_BMPR1A_ACVR2B	BMP	BMP8A	BMPR1A_ACVR2B		BMP antagonist		BMP inhibition receptor	KEGG: hsa04350; PMID:26893264	Secreted Signaling	BMP8A - (BMPR1A+ACVR2B)
BMP8A_BMPR1A_BMPR2	BMP8A_BMPR1A_BMPR2	BMP	BMP8A	BMPR1A_BMPR2		BMP antagonist		BMP inhibition receptor	KEGG: hsa04350; PMID:26893264	Secreted Signaling	BMP8A - (BMPR1A+BMPR2)
BMP8A_BMPR1B_ACVR2A	BMP8A_BMPR1B_ACVR2A	BMP	BMP8A	BMPR1B_ACVR2A		BMP antagonist		BMP inhibition receptor	KEGG: hsa04350; PMID:26893264	Secreted Signaling	BMP8A - (BMPR1B+ACVR2A)
BMP8A_BMPR1B_ACVR2B	BMP8A_BMPR1B_ACVR2B	BMP	BMP8A	BMPR1B_ACVR2B		BMP antagonist		BMP inhibition receptor	KEGG: hsa04350; PMID:26893264	Secreted Signaling	BMP8A - (BMPR1B+ACVR2B)
BMP8A_BMPR1B_BMPR2	BMP8A_BMPR1B_BMPR2	BMP	BMP8A	BMPR1B_BMPR2		BMP antagonist		BMP inhibition receptor	KEGG: hsa04350; PMID:26893264	Secreted Signaling	BMP8A - (BMPR1B+BMPR2)
BMP8B_ACVR1_ACVR2A	BMP8B_ACVR1_ACVR2A	BMP	BMP8B	ACVR1_ACVR2A		BMP antagonist		BMP inhibition receptor	KEGG: hsa04350; PMID:26893264	Secreted Signaling	BMP8B - (ACVR1+ACVR2A)
BMP8B_ACVR1_ACVR2B	BMP8B_ACVR1_ACVR2B	BMP	BMP8B	ACVR1_ACVR2B		BMP antagonist		BMP inhibition receptor	KEGG: hsa04350; PMID:26893264	Secreted Signaling	BMP8B - (ACVR1+ACVR2B)
BMP8B_ACVR1_BMPR2	BMP8B_ACVR1_BMPR2	BMP	BMP8B	ACVR1_BMPR2		BMP antagonist		BMP inhibition receptor	KEGG: hsa04350; PMID:26893264	Secreted Signaling	BMP8B - (ACVR1+BMPR2)
BMP8B_BMPR1A_ACVR2A	BMP8B_BMPR1A_ACVR2A	BMP	BMP8B	BMPR1A_ACVR2A		BMP antagonist		BMP inhibition receptor	KEGG: hsa04350; PMID:26893264	Secreted Signaling	BMP8B - (BMPR1A+ACVR2A)
BMP8B_BMPR1A_ACVR2B	BMP8B_BMPR1A_ACVR2B	BMP	BMP8B	BMPR1A_ACVR2B		BMP antagonist		BMP inhibition receptor	KEGG: hsa04350; PMID:26893264	Secreted Signaling	BMP8B - (BMPR1A+ACVR2B)
BMP8B_BMPR1A_BMPR2	BMP8B_BMPR1A_BMPR2	BMP	BMP8B	BMPR1A_BMPR2		BMP antagonist		BMP inhibition receptor	KEGG: hsa04350; PMID:26893264	Secreted Signaling	BMP8B - (BMPR1A+BMPR2)
BMP8B_BMPR1B_ACVR2A	BMP8B_BMPR1B_ACVR2A	BMP	BMP8B	BMPR1B_ACVR2A		BMP antagonist		BMP inhibition receptor	KEGG: hsa04350; PMID:26893264	Secreted Signaling	BMP8B - (BMPR1B+ACVR2A)
BMP8B_BMPR1B_ACVR2B	BMP8B_BMPR1B_ACVR2B	BMP	BMP8B	BMPR1B_ACVR2B		BMP antagonist		BMP inhibition receptor	KEGG: hsa04350; PMID:26893264	Secreted Signaling	BMP8B - (BMPR1B+ACVR2B)
BMP8B_BMPR1B_BMPR2	BMP8B_BMPR1B_BMPR2	BMP	BMP8B	BMPR1B_BMPR2		BMP antagonist		BMP inhibition receptor	KEGG: hsa04350; PMID:26893264	Secreted Signaling	BMP8B - (BMPR1B+BMPR2)
GDF11_TGFBR1_ACVR2A	GDF11_TGFBR1_ACVR2A	GDF	GDF11	TGFBR1_ACVR2A					KEGG: hsa04350	Secreted Signaling	GDF11 - (TGFBR1+ACVR2A)
GDF11_TGFBR1_ACVR2B	GDF11_TGFBR1_ACVR2B	GDF	GDF11	TGFBR1_ACVR2B					KEGG: hsa04350	Secreted Signaling	GDF11 - (TGFBR1+ACVR2B)
GDF11_ACVR1B_ACVR2B	GDF11_ACVR1B_ACVR2B	GDF	GDF11	ACVR1B_ACVR2B					KEGG: hsa04350	Secreted Signaling	GDF11 - (ACVR1B+ACVR2B)
GDF15_TGFBR2	GDF15_TGFBR2	GDF	GDF15	TGFBR2					KEGG: hsa04350	Secreted Signaling	GDF15 - TGFBR2
MSTN_TGFBR1_ACVR2B	MSTN_TGFBR1_ACVR2B	MSTN	MSTN	TGFBR1_ACVR2B					KEGG: hsa04060	Secreted Signaling	MSTN - (TGFBR1+ACVR2B)
MSTN_ACVR1B_ACVR2B	MSTN_ACVR1B_ACVR2B	MSTN	MSTN	ACVR1B_ACVR2B					KEGG: hsa04060	Secreted Signaling	MSTN - (ACVR1B+ACVR2B)
MSTN_ACVR1B_ACVR2A	MSTN_ACVR1B_ACVR2A	MSTN	MSTN	ACVR1B_ACVR2A					KEGG: hsa04060	Secreted Signaling	MSTN - (ACVR1B+ACVR2A)
MSTN_TGFBR1_ACVR2A	MSTN_TGFBR1_ACVR2A	MSTN	MSTN	TGFBR1_ACVR2A					KEGG: hsa04060	Secreted Signaling	MSTN - (TGFBR1+ACVR2A)
AMH_AMHR2_ACVR1	AMH_AMHR2_ACVR1	AMH	AMH	AMHR2_ACVR1					KEGG: hsa04060	Secreted Signaling	AMH - (AMHR2+ACVR1)
AMH_AMHR2_BMPR1A	AMH_AMHR2_BMPR1A	AMH	AMH	AMHR2_BMPR1A					KEGG: hsa04060	Secreted Signaling	AMH - (AMHR2+BMPR1A)
GDNF_GFRA1	GDNF_GFRA1	GDNF	GDNF	GFRA1_RET					PMID: 11544105	Secreted Signaling	GDNF - GFRA1
ARTN_GFRA1	ARTN_GFRA1	GDNF	ARTN	GFRA1_RET					PMID: 11544109	Secreted Signaling	ARTN - GFRA1
INHBA_ACVR1B_ACVR2A	INHBA_ACVR1B_ACVR2A	ACTIVIN	INHBA	ACVR1B_ACVR2A		ACTIVIN antagonist		ACTIVIN inhibition receptor	KEGG: hsa04350	Secreted Signaling	INHBA - (ACVR1B+ACVR2A)
INHBA_ACVR1B_ACVR2B	INHBA_ACVR1B_ACVR2B	ACTIVIN	INHBA	ACVR1B_ACVR2B		ACTIVIN antagonist		ACTIVIN inhibition receptor	KEGG: hsa04351	Secreted Signaling	INHBA - (ACVR1B+ACVR2B)
INHBB_ACVR1B_ACVR2A	INHBB_ACVR1B_ACVR2A	ACTIVIN	INHBB	ACVR1B_ACVR2A		ACTIVIN antagonist		ACTIVIN inhibition receptor	KEGG: hsa04352	Secreted Signaling	INHBB - (ACVR1B+ACVR2A)
INHBB_ACVR1B_ACVR2B	INHBB_ACVR1B_ACVR2B	ACTIVIN	INHBB	ACVR1B_ACVR2B		ACTIVIN antagonist		ACTIVIN inhibition receptor	KEGG: hsa04353	Secreted Signaling	INHBB - (ACVR1B+ACVR2B)
INHBB_ACVR1C_ACVR2A	INHBB_ACVR1C_ACVR2A	ACTIVIN	INHBB	ACVR1C_ACVR2A		ACTIVIN antagonist		ACTIVIN inhibition receptor	KEGG: hsa04354	Secreted Signaling	INHBB - (ACVR1C+ACVR2A)
INHBABB_ACVR1B_ACVR2A	INHBABB_ACVR1B_ACVR2A	ACTIVIN	Activin AB	ACVR1B_ACVR2A		ACTIVIN antagonist		ACTIVIN inhibition receptor	PMID: 2457849; PMID: 22991378	Secreted Signaling	INHBABB - (ACVR1B+ACVR2A)
INHBABB_ACVR1B_ACVR2B	INHBABB_ACVR1B_ACVR2B	ACTIVIN	Activin AB	ACVR1B_ACVR2B		ACTIVIN antagonist		ACTIVIN inhibition receptor	PMID: 2457849; PMID: 22991378	Secreted Signaling	INHBABB - (ACVR1B+ACVR2B)
INHBABB_ACVR1C_ACVR2A	INHBABB_ACVR1C_ACVR2A	ACTIVIN	Activin AB	ACVR1C_ACVR2A		ACTIVIN antagonist		ACTIVIN inhibition receptor	PMID: 2457849; PMID: 22991378	Secreted Signaling	INHBABB - (ACVR1C+ACVR2A)
INHABA_ACVR2A	INHABA_ACVR2A	ACTIVIN	Inhibin A	ACVR2A		ACTIVIN antagonist		ACTIVIN inhibition receptor	PMID: 15027884	Secreted Signaling	INHABA - ACVR2A
WNT10A_FZD1_LRP5	WNT10A_FZD1_LRP5	WNT	WNT10A	FZD1_LRP5	WNT agonist	WNT antagonist	WNT activation receptor	WNT inhibition receptor	KEGG: hsa04310; PMID: 23209147	Secreted Signaling	WNT10A - (FZD1+LRP5)
WNT10A_FZD2_LRP5	WNT10A_FZD2_LRP5	WNT	WNT10A	FZD2_LRP5	WNT agonist	WNT antagonist	WNT activation receptor	WNT inhibition receptor	KEGG: hsa04310; PMID: 23209147	Secreted Signaling	WNT10A - (FZD2+LRP5)
WNT10A_FZD3_LRP5	WNT10A_FZD3_LRP5	WNT	WNT10A	FZD3_LRP5	WNT agonist	WNT antagonist	WNT activation receptor	WNT inhibition receptor	KEGG: hsa04310; PMID: 23209147	Secreted Signaling	WNT10A - (FZD3+LRP5)
WNT10A_FZD4_LRP5	WNT10A_FZD4_LRP5	WNT	WNT10A	FZD4_LRP5	WNT agonist	WNT antagonist	WNT activation receptor	WNT inhibition receptor	KEGG: hsa04310; PMID: 23209147	Secreted Signaling	WNT10A - (FZD4+LRP5)
WNT10A_FZD5_LRP5	WNT10A_FZD5_LRP5	WNT	WNT10A	FZD5_LRP5	WNT agonist	WNT antagonist	WNT activation receptor	WNT inhibition receptor	KEGG: hsa04310; PMID: 23209147	Secreted Signaling	WNT10A - (FZD5+LRP5)
WNT10A_FZD6_LRP5	WNT10A_FZD6_LRP5	WNT	WNT10A	FZD6_LRP5	WNT agonist	WNT antagonist	WNT activation receptor	WNT inhibition receptor	KEGG: hsa04310; PMID: 23209147	Secreted Signaling	WNT10A - (FZD6+LRP5)
WNT10A_FZD7_LRP5	WNT10A_FZD7_LRP5	WNT	WNT10A	FZD7_LRP5	WNT agonist	WNT antagonist	WNT activation receptor	WNT inhibition receptor	KEGG: hsa04310; PMID: 23209147	Secreted Signaling	WNT10A - (FZD7+LRP5)
WNT10A_FZD8_LRP5	WNT10A_FZD8_LRP5	WNT	WNT10A	FZD8_LRP5	WNT agonist	WNT antagonist	WNT activation receptor	WNT inhibition receptor	KEGG: hsa04310; PMID: 23209147	Secreted Signaling	WNT10A - (FZD8+LRP5)
WNT10A_FZD9_LRP5	WNT10A_FZD9_LRP5	WNT	WNT10A	FZD9_LRP5	WNT agonist	WNT antagonist	WNT activation receptor	WNT inhibition receptor	KEGG: hsa04310; PMID: 23209147	Secreted Signaling	WNT10A - (FZD9+LRP5)
WNT10B_FZD1_LRP5	WNT10B_FZD1_LRP5	WNT	WNT10B	FZD1_LRP5	WNT agonist	WNT antagonist	WNT activation receptor	WNT inhibition receptor	KEGG: hsa04310; PMID: 23209147	Secreted Signaling	WNT10B - (FZD1+LRP5)
WNT10B_FZD2_LRP5	WNT10B_FZD2_LRP5	WNT	WNT10B	FZD2_LRP5	WNT agonist	WNT antagonist	WNT activation receptor	WNT inhibition receptor	KEGG: hsa04310; PMID: 23209147	Secreted Signaling	WNT10B - (FZD2+LRP5)
WNT10B_FZD3_LRP5	WNT10B_FZD3_LRP5	WNT	WNT10B	FZD3_LRP5	WNT agonist	WNT antagonist	WNT activation receptor	WNT inhibition receptor	KEGG: hsa04310; PMID: 23209147	Secreted Signaling	WNT10B - (FZD3+LRP5)
WNT10B_FZD4_LRP5	WNT10B_FZD4_LRP5	WNT	WNT10B	FZD4_LRP5	WNT agonist	WNT antagonist	WNT activation receptor	WNT inhibition receptor	KEGG: hsa04310; PMID: 23209147	Secreted Signaling	WNT10B - (FZD4+LRP5)
WNT10B_FZD5_LRP5	WNT10B_FZD5_LRP5	WNT	WNT10B	FZD5_LRP5	WNT agonist	WNT antagonist	WNT activation receptor	WNT inhibition receptor	KEGG: hsa04310; PMID: 23209147	Secreted Signaling	WNT10B - (FZD5+LRP5)
WNT10B_FZD6_LRP5	WNT10B_FZD6_LRP5	WNT	WNT10B	FZD6_LRP5	WNT agonist	WNT antagonist	WNT activation receptor	WNT inhibition receptor	KEGG: hsa04310; PMID: 23209147	Secreted Signaling	WNT10B - (FZD6+LRP5)
WNT10B_FZD7_LRP5	WNT10B_FZD7_LRP5	WNT	WNT10B	FZD7_LRP5	WNT agonist	WNT antagonist	WNT activation receptor	WNT inhibition receptor	KEGG: hsa04310; PMID: 23209147	Secreted Signaling	WNT10B - (FZD7+LRP5)
WNT10B_FZD8_LRP5	WNT10B_FZD8_LRP5	WNT	WNT10B	FZD8_LRP5	WNT agonist	WNT antagonist	WNT activation receptor	WNT inhibition receptor	KEGG: hsa04310; PMID: 23209147	Secreted Signaling	WNT10B - (FZD8+LRP5)
WNT10B_FZD9_LRP5	WNT10B_FZD9_LRP5	WNT	WNT10B	FZD9_LRP5	WNT agonist	WNT antagonist	WNT activation receptor	WNT inhibition receptor	KEGG: hsa04310; PMID: 23209147	Secreted Signaling	WNT10B - (FZD9+LRP5)
WNT16_FZD1_LRP5	WNT16_FZD1_LRP5	WNT	WNT16	FZD1_LRP5	WNT agonist	WNT antagonist	WNT activation receptor	WNT inhibition receptor	KEGG: hsa04310; PMID: 23209147	Secreted Signaling	WNT16 - (FZD1+LRP5)
WNT16_FZD2_LRP5	WNT16_FZD2_LRP5	WNT	WNT16	FZD2_LRP5	WNT agonist	WNT antagonist	WNT activation receptor	WNT inhibition receptor	KEGG: hsa04310; PMID: 23209147	Secreted Signaling	WNT16 - (FZD2+LRP5)
WNT16_FZD3_LRP5	WNT16_FZD3_LRP5	WNT	WNT16	FZD3_LRP5	WNT agonist	WNT antagonist	WNT activation receptor	WNT inhibition receptor	KEGG: hsa04310; PMID: 23209147	Secreted Signaling	WNT16 - (FZD3+LRP5)
WNT16_FZD4_LRP5	WNT16_FZD4_LRP5	WNT	WNT16	FZD4_LRP5	WNT agonist	WNT antagonist	WNT activation receptor	WNT inhibition receptor	KEGG: hsa04310; PMID: 23209147	Secreted Signaling	WNT16 - (FZD4+LRP5)
WNT16_FZD5_LRP5	WNT16_FZD5_LRP5	WNT	WNT16	FZD5_LRP5	WNT agonist	WNT antagonist	WNT activation receptor	WNT inhibition receptor	KEGG: hsa04310; PMID: 23209147	Secreted Signaling	WNT16 - (FZD5+LRP5)
WNT16_FZD6_LRP5	WNT16_FZD6_LRP5	WNT	WNT16	FZD6_LRP5	WNT agonist	WNT antagonist	WNT activation receptor	WNT inhibition receptor	KEGG: hsa04310; PMID: 23209147	Secreted Signaling	WNT16 - (FZD6+LRP5)
WNT16_FZD7_LRP5	WNT16_FZD7_LRP5	WNT	WNT16	FZD7_LRP5	WNT agonist	WNT antagonist	WNT activation receptor	WNT inhibition receptor	KEGG: hsa04310; PMID: 23209147	Secreted Signaling	WNT16 - (FZD7+LRP5)
WNT16_FZD8_LRP5	WNT16_FZD8_LRP5	WNT	WNT16	FZD8_LRP5	WNT agonist	WNT antagonist	WNT activation receptor	WNT inhibition receptor	KEGG: hsa04310; PMID: 23209147	Secreted Signaling	WNT16 - (FZD8+LRP5)
WNT16_FZD9_LRP5	WNT16_FZD9_LRP5	WNT	WNT16	FZD9_LRP5	WNT agonist	WNT antagonist	WNT activation receptor	WNT inhibition receptor	KEGG: hsa04310; PMID: 23209147	Secreted Signaling	WNT16 - (FZD9+LRP5)
WNT2_FZD1_LRP5	WNT2_FZD1_LRP5	WNT	WNT2	FZD1_LRP5	WNT agonist	WNT antagonist	WNT activation receptor	WNT inhibition receptor	KEGG: hsa04310; PMID: 23209147	Secreted Signaling	WNT2 - (FZD1+LRP5)
WNT2_FZD2_LRP5	WNT2_FZD2_LRP5	WNT	WNT2	FZD2_LRP5	WNT agonist	WNT antagonist	WNT activation receptor	WNT inhibition receptor	KEGG: hsa04310; PMID: 23209147	Secreted Signaling	WNT2 - (FZD2+LRP5)
WNT2_FZD3_LRP5	WNT2_FZD3_LRP5	WNT	WNT2	FZD3_LRP5	WNT agonist	WNT antagonist	WNT activation receptor	WNT inhibition receptor	KEGG: hsa04310; PMID: 23209147	Secreted Signaling	WNT2 - (FZD3+LRP5)
WNT2_FZD4_LRP5	WNT2_FZD4_LRP5	WNT	WNT2	FZD4_LRP5	WNT agonist	WNT antagonist	WNT activation receptor	WNT inhibition receptor	KEGG: hsa04310; PMID: 23209147	Secreted Signaling	WNT2 - (FZD4+LRP5)
WNT2_FZD5_LRP5	WNT2_FZD5_LRP5	WNT	WNT2	FZD5_LRP5	WNT agonist	WNT antagonist	WNT activation receptor	WNT inhibition receptor	KEGG: hsa04310; PMID: 23209147	Secreted Signaling	WNT2 - (FZD5+LRP5)
WNT2_FZD6_LRP5	WNT2_FZD6_LRP5	WNT	WNT2	FZD6_LRP5	WNT agonist	WNT antagonist	WNT activation receptor	WNT inhibition receptor	KEGG: hsa04310; PMID: 23209147	Secreted Signaling	WNT2 - (FZD6+LRP5)
WNT2_FZD7_LRP5	WNT2_FZD7_LRP5	WNT	WNT2	FZD7_LRP5	WNT agonist	WNT antagonist	WNT activation receptor	WNT inhibition receptor	KEGG: hsa04310; PMID: 23209147	Secreted Signaling	WNT2 - (FZD7+LRP5)
WNT2_FZD8_LRP5	WNT2_FZD8_LRP5	WNT	WNT2	FZD8_LRP5	WNT agonist	WNT antagonist	WNT activation receptor	WNT inhibition receptor	KEGG: hsa04310; PMID: 23209147	Secreted Signaling	WNT2 - (FZD8+LRP5)
WNT2_FZD9_LRP5	WNT2_FZD9_LRP5	WNT	WNT2	FZD9_LRP5	WNT agonist	WNT antagonist	WNT activation receptor	WNT inhibition receptor	KEGG: hsa04310; PMID: 23209147	Secreted Signaling	WNT2 - (FZD9+LRP5)
WNT2B_FZD1_LRP5	WNT2B_FZD1_LRP5	WNT	WNT2B	FZD1_LRP5	WNT agonist	WNT antagonist	WNT activation receptor	WNT inhibition receptor	KEGG: hsa04310; PMID: 23209147	Secreted Signaling	WNT2B - (FZD1+LRP5)
WNT2B_FZD2_LRP5	WNT2B_FZD2_LRP5	WNT	WNT2B	FZD2_LRP5	WNT agonist	WNT antagonist	WNT activation receptor	WNT inhibition receptor	KEGG: hsa04310; PMID: 23209147	Secreted Signaling	WNT2B - (FZD2+LRP5)
WNT2B_FZD3_LRP5	WNT2B_FZD3_LRP5	WNT	WNT2B	FZD3_LRP5	WNT agonist	WNT antagonist	WNT activation receptor	WNT inhibition receptor	KEGG: hsa04310; PMID: 23209147	Secreted Signaling	WNT2B - (FZD3+LRP5)
WNT2B_FZD4_LRP5	WNT2B_FZD4_LRP5	WNT	WNT2B	FZD4_LRP5	WNT agonist	WNT antagonist	WNT activation receptor	WNT inhibition receptor	KEGG: hsa04310; PMID: 23209147	Secreted Signaling	WNT2B - (FZD4+LRP5)
WNT2B_FZD5_LRP5	WNT2B_FZD5_LRP5	WNT	WNT2B	FZD5_LRP5	WNT agonist	WNT antagonist	WNT activation receptor	WNT inhibition receptor	KEGG: hsa04310; PMID: 23209147	Secreted Signaling	WNT2B - (FZD5+LRP5)
WNT2B_FZD6_LRP5	WNT2B_FZD6_LRP5	WNT	WNT2B	FZD6_LRP5	WNT agonist	WNT antagonist	WNT activation receptor	WNT inhibition receptor	KEGG: hsa04310; PMID: 23209147	Secreted Signaling	WNT2B - (FZD6+LRP5)
WNT2B_FZD7_LRP5	WNT2B_FZD7_LRP5	WNT	WNT2B	FZD7_LRP5	WNT agonist	WNT antagonist	WNT activation receptor	WNT inhibition receptor	KEGG: hsa04310; PMID: 23209147	Secreted Signaling	WNT2B - (FZD7+LRP5)
WNT2B_FZD8_LRP5	WNT2B_FZD8_LRP5	WNT	WNT2B	FZD8_LRP5	WNT agonist	WNT antagonist	WNT activation receptor	WNT inhibition receptor	KEGG: hsa04310; PMID: 23209147	Secreted Signaling	WNT2B - (FZD8+LRP5)
WNT2B_FZD9_LRP5	WNT2B_FZD9_LRP5	WNT	WNT2B	FZD9_LRP5	WNT agonist	WNT antagonist	WNT activation receptor	WNT inhibition receptor	KEGG: hsa04310; PMID: 23209147	Secreted Signaling	WNT2B - (FZD9+LRP5)
WNT7B_FZD1_LRP5	WNT7B_FZD1_LRP5	WNT	WNT7B	FZD1_LRP5	WNT agonist	WNT antagonist	WNT activation receptor	WNT inhibition receptor	KEGG: hsa04310; PMID: 23209147	Secreted Signaling	WNT7B - (FZD1+LRP5)
WNT7B_FZD2_LRP5	WNT7B_FZD2_LRP5	WNT	WNT7B	FZD2_LRP5	WNT agonist	WNT antagonist	WNT activation receptor	WNT inhibition receptor	KEGG: hsa04310; PMID: 23209147	Secreted Signaling	WNT7B - (FZD2+LRP5)
WNT7B_FZD3_LRP5	WNT7B_FZD3_LRP5	WNT	WNT7B	FZD3_LRP5	WNT agonist	WNT antagonist	WNT activation receptor	WNT inhibition receptor	KEGG: hsa04310; PMID: 23209147	Secreted Signaling	WNT7B - (FZD3+LRP5)
WNT7B_FZD4_LRP5	WNT7B_FZD4_LRP5	WNT	WNT7B	FZD4_LRP5	WNT agonist	WNT antagonist	WNT activation receptor	WNT inhibition receptor	KEGG: hsa04310; PMID: 23209147	Secreted Signaling	WNT7B - (FZD4+LRP5)
WNT7B_FZD5_LRP5	WNT7B_FZD5_LRP5	WNT	WNT7B	FZD5_LRP5	WNT agonist	WNT antagonist	WNT activation receptor	WNT inhibition receptor	KEGG: hsa04310; PMID: 23209147	Secreted Signaling	WNT7B - (FZD5+LRP5)
WNT7B_FZD6_LRP5	WNT7B_FZD6_LRP5	WNT	WNT7B	FZD6_LRP5	WNT agonist	WNT antagonist	WNT activation receptor	WNT inhibition receptor	KEGG: hsa04310; PMID: 23209147	Secreted Signaling	WNT7B - (FZD6+LRP5)
WNT7B_FZD7_LRP5	WNT7B_FZD7_LRP5	WNT	WNT7B	FZD7_LRP5	WNT agonist	WNT antagonist	WNT activation receptor	WNT inhibition receptor	KEGG: hsa04310; PMID: 23209147	Secreted Signaling	WNT7B - (FZD7+LRP5)
WNT7B_FZD8_LRP5	WNT7B_FZD8_LRP5	WNT	WNT7B	FZD8_LRP5	WNT agonist	WNT antagonist	WNT activation receptor	WNT inhibition receptor	KEGG: hsa04310; PMID: 23209147	Secreted Signaling	WNT7B - (FZD8+LRP5)
WNT7B_FZD9_LRP5	WNT7B_FZD9_LRP5	WNT	WNT7B	FZD9_LRP5	WNT agonist	WNT antagonist	WNT activation receptor	WNT inhibition receptor	KEGG: hsa04310; PMID: 23209147	Secreted Signaling	WNT7B - (FZD9+LRP5)
WNT10A_FZD1_LRP6	WNT10A_FZD1_LRP6	WNT	WNT10A	FZD1_LRP6	WNT agonist	WNT antagonist	WNT activation receptor	WNT inhibition receptor	KEGG: hsa04310; PMID: 23209147	Secreted Signaling	WNT10A - (FZD1+LRP6)
WNT10A_FZD2_LRP6	WNT10A_FZD2_LRP6	WNT	WNT10A	FZD2_LRP6	WNT agonist	WNT antagonist	WNT activation receptor	WNT inhibition receptor	KEGG: hsa04310; PMID: 23209147	Secreted Signaling	WNT10A - (FZD2+LRP6)
WNT10A_FZD3_LRP6	WNT10A_FZD3_LRP6	WNT	WNT10A	FZD3_LRP6	WNT agonist	WNT antagonist	WNT activation receptor	WNT inhibition receptor	KEGG: hsa04310; PMID: 23209147	Secreted Signaling	WNT10A - (FZD3+LRP6)
WNT10A_FZD4_LRP6	WNT10A_FZD4_LRP6	WNT	WNT10A	FZD4_LRP6	WNT agonist	WNT antagonist	WNT activation receptor	WNT inhibition receptor	KEGG: hsa04310; PMID: 23209147	Secreted Signaling	WNT10A - (FZD4+LRP6)
WNT10A_FZD5_LRP6	WNT10A_FZD5_LRP6	WNT	WNT10A	FZD5_LRP6	WNT agonist	WNT antagonist	WNT activation receptor	WNT inhibition receptor	KEGG: hsa04310; PMID: 23209147	Secreted Signaling	WNT10A - (FZD5+LRP6)
WNT10A_FZD6_LRP6	WNT10A_FZD6_LRP6	WNT	WNT10A	FZD6_LRP6	WNT agonist	WNT antagonist	WNT activation receptor	WNT inhibition receptor	KEGG: hsa04310; PMID: 23209147	Secreted Signaling	WNT10A - (FZD6+LRP6)
WNT10A_FZD7_LRP6	WNT10A_FZD7_LRP6	WNT	WNT10A	FZD7_LRP6	WNT agonist	WNT antagonist	WNT activation receptor	WNT inhibition receptor	KEGG: hsa04310; PMID: 23209147	Secreted Signaling	WNT10A - (FZD7+LRP6)
WNT10A_FZD8_LRP6	WNT10A_FZD8_LRP6	WNT	WNT10A	FZD8_LRP6	WNT agonist	WNT antagonist	WNT activation receptor	WNT inhibition receptor	KEGG: hsa04310; PMID: 23209147	Secreted Signaling	WNT10A - (FZD8+LRP6)
WNT10A_FZD9_LRP6	WNT10A_FZD9_LRP6	WNT	WNT10A	FZD9_LRP6	WNT agonist	WNT antagonist	WNT activation receptor	WNT inhibition receptor	KEGG: hsa04310; PMID: 23209147	Secreted Signaling	WNT10A - (FZD9+LRP6)
WNT10B_FZD1_LRP6	WNT10B_FZD1_LRP6	WNT	WNT10B	FZD1_LRP6	WNT agonist	WNT antagonist	WNT activation receptor	WNT inhibition receptor	KEGG: hsa04310; PMID: 23209147	Secreted Signaling	WNT10B - (FZD1+LRP6)
WNT10B_FZD2_LRP6	WNT10B_FZD2_LRP6	WNT	WNT10B	FZD2_LRP6	WNT agonist	WNT antagonist	WNT activation receptor	WNT inhibition receptor	KEGG: hsa04310; PMID: 23209147	Secreted Signaling	WNT10B - (FZD2+LRP6)
WNT10B_FZD3_LRP6	WNT10B_FZD3_LRP6	WNT	WNT10B	FZD3_LRP6	WNT agonist	WNT antagonist	WNT activation receptor	WNT inhibition receptor	KEGG: hsa04310; PMID: 23209147	Secreted Signaling	WNT10B - (FZD3+LRP6)
WNT10B_FZD4_LRP6	WNT10B_FZD4_LRP6	WNT	WNT10B	FZD4_LRP6	WNT agonist	WNT antagonist	WNT activation receptor	WNT inhibition receptor	KEGG: hsa04310; PMID: 23209147	Secreted Signaling	WNT10B - (FZD4+LRP6)
WNT10B_FZD5_LRP6	WNT10B_FZD5_LRP6	WNT	WNT10B	FZD5_LRP6	WNT agonist	WNT antagonist	WNT activation receptor	WNT inhibition receptor	KEGG: hsa04310; PMID: 23209147	Secreted Signaling	WNT10B - (FZD5+LRP6)
WNT10B_FZD6_LRP6	WNT10B_FZD6_LRP6	WNT	WNT10B	FZD6_LRP6	WNT agonist	WNT antagonist	WNT activation receptor	WNT inhibition receptor	KEGG: hsa04310; PMID: 23209147	Secreted Signaling	WNT10B - (FZD6+LRP6)
WNT10B_FZD7_LRP6	WNT10B_FZD7_LRP6	WNT	WNT10B	FZD7_LRP6	WNT agonist	WNT antagonist	WNT activation receptor	WNT inhibition receptor	KEGG: hsa04310; PMID: 23209147	Secreted Signaling	WNT10B - (FZD7+LRP6)
WNT10B_FZD8_LRP6	WNT10B_FZD8_LRP6	WNT	WNT10B	FZD8_LRP6	WNT agonist	WNT antagonist	WNT activation receptor	WNT inhibition receptor	KEGG: hsa04310; PMID: 23209147	Secreted Signaling	WNT10B - (FZD8+LRP6)
WNT10B_FZD9_LRP6	WNT10B_FZD9_LRP6	WNT	WNT10B	FZD9_LRP6	WNT agonist	WNT antagonist	WNT activation receptor	WNT inhibition receptor	KEGG: hsa04310; PMID: 23209147	Secreted Signaling	WNT10B - (FZD9+LRP6)
WNT16_FZD1_LRP6	WNT16_FZD1_LRP6	WNT	WNT16	FZD1_LRP6	WNT agonist	WNT antagonist	WNT activation receptor	WNT inhibition receptor	KEGG: hsa04310; PMID: 23209147	Secreted Signaling	WNT16 - (FZD1+LRP6)
WNT16_FZD2_LRP6	WNT16_FZD2_LRP6	WNT	WNT16	FZD2_LRP6	WNT agonist	WNT antagonist	WNT activation receptor	WNT inhibition receptor	KEGG: hsa04310; PMID: 23209147	Secreted Signaling	WNT16 - (FZD2+LRP6)
WNT16_FZD3_LRP6	WNT16_FZD3_LRP6	WNT	WNT16	FZD3_LRP6	WNT agonist	WNT antagonist	WNT activation receptor	WNT inhibition receptor	KEGG: hsa04310; PMID: 23209147	Secreted Signaling	WNT16 - (FZD3+LRP6)
WNT16_FZD4_LRP6	WNT16_FZD4_LRP6	WNT	WNT16	FZD4_LRP6	WNT agonist	WNT antagonist	WNT activation receptor	WNT inhibition receptor	KEGG: hsa04310; PMID: 23209147	Secreted Signaling	WNT16 - (FZD4+LRP6)
WNT16_FZD5_LRP6	WNT16_FZD5_LRP6	WNT	WNT16	FZD5_LRP6	WNT agonist	WNT antagonist	WNT activation receptor	WNT inhibition receptor	KEGG: hsa04310; PMID: 23209147	Secreted Signaling	WNT16 - (FZD5+LRP6)
WNT16_FZD6_LRP6	WNT16_FZD6_LRP6	WNT	WNT16	FZD6_LRP6	WNT agonist	WNT antagonist	WNT activation receptor	WNT inhibition receptor	KEGG: hsa04310; PMID: 23209147	Secreted Signaling	WNT16 - (FZD6+LRP6)
WNT16_FZD7_LRP6	WNT16_FZD7_LRP6	WNT	WNT16	FZD7_LRP6	WNT agonist	WNT antagonist	WNT activation receptor	WNT inhibition receptor	KEGG: hsa04310; PMID: 23209147	Secreted Signaling	WNT16 - (FZD7+LRP6)
WNT16_FZD8_LRP6	WNT16_FZD8_LRP6	WNT	WNT16	FZD8_LRP6	WNT agonist	WNT antagonist	WNT activation receptor	WNT inhibition receptor	KEGG: hsa04310; PMID: 23209147	Secreted Signaling	WNT16 - (FZD8+LRP6)
WNT16_FZD9_LRP6	WNT16_FZD9_LRP6	WNT	WNT16	FZD9_LRP6	WNT agonist	WNT antagonist	WNT activation receptor	WNT inhibition receptor	KEGG: hsa04310; PMID: 23209147	Secreted Signaling	WNT16 - (FZD9+LRP6)
WNT2_FZD1_LRP6	WNT2_FZD1_LRP6	WNT	WNT2	FZD1_LRP6	WNT agonist	WNT antagonist	WNT activation receptor	WNT inhibition receptor	KEGG: hsa04310; PMID: 23209147	Secreted Signaling	WNT2 - (FZD1+LRP6)
WNT2_FZD2_LRP6	WNT2_FZD2_LRP6	WNT	WNT2	FZD2_LRP6	WNT agonist	WNT antagonist	WNT activation receptor	WNT inhibition receptor	KEGG: hsa04310; PMID: 23209147	Secreted Signaling	WNT2 - (FZD2+LRP6)
WNT2_FZD3_LRP6	WNT2_FZD3_LRP6	WNT	WNT2	FZD3_LRP6	WNT agonist	WNT antagonist	WNT activation receptor	WNT inhibition receptor	KEGG: hsa04310; PMID: 23209147	Secreted Signaling	WNT2 - (FZD3+LRP6)
WNT2_FZD4_LRP6	WNT2_FZD4_LRP6	WNT	WNT2	FZD4_LRP6	WNT agonist	WNT antagonist	WNT activation receptor	WNT inhibition receptor	KEGG: hsa04310; PMID: 23209147	Secreted Signaling	WNT2 - (FZD4+LRP6)
WNT2_FZD5_LRP6	WNT2_FZD5_LRP6	WNT	WNT2	FZD5_LRP6	WNT agonist	WNT antagonist	WNT activation receptor	WNT inhibition receptor	KEGG: hsa04310; PMID: 23209147	Secreted Signaling	WNT2 - (FZD5+LRP6)
WNT2_FZD6_LRP6	WNT2_FZD6_LRP6	WNT	WNT2	FZD6_LRP6	WNT agonist	WNT antagonist	WNT activation receptor	WNT inhibition receptor	KEGG: hsa04310; PMID: 23209147	Secreted Signaling	WNT2 - (FZD6+LRP6)
WNT2_FZD7_LRP6	WNT2_FZD7_LRP6	WNT	WNT2	FZD7_LRP6	WNT agonist	WNT antagonist	WNT activation receptor	WNT inhibition receptor	KEGG: hsa04310; PMID: 23209147	Secreted Signaling	WNT2 - (FZD7+LRP6)
WNT2_FZD8_LRP6	WNT2_FZD8_LRP6	WNT	WNT2	FZD8_LRP6	WNT agonist	WNT antagonist	WNT activation receptor	WNT inhibition receptor	KEGG: hsa04310; PMID: 23209147	Secreted Signaling	WNT2 - (FZD8+LRP6)
WNT2_FZD9_LRP6	WNT2_FZD9_LRP6	WNT	WNT2	FZD9_LRP6	WNT agonist	WNT antagonist	WNT activation receptor	WNT inhibition receptor	KEGG: hsa04310; PMID: 23209147	Secreted Signaling	WNT2 - (FZD9+LRP6)
WNT2B_FZD1_LRP6	WNT2B_FZD1_LRP6	WNT	WNT2B	FZD1_LRP6	WNT agonist	WNT antagonist	WNT activation receptor	WNT inhibition receptor	KEGG: hsa04310; PMID: 23209147	Secreted Signaling	WNT2B - (FZD1+LRP6)
WNT2B_FZD2_LRP6	WNT2B_FZD2_LRP6	WNT	WNT2B	FZD2_LRP6	WNT agonist	WNT antagonist	WNT activation receptor	WNT inhibition receptor	KEGG: hsa04310; PMID: 23209147	Secreted Signaling	WNT2B - (FZD2+LRP6)
WNT2B_FZD3_LRP6	WNT2B_FZD3_LRP6	WNT	WNT2B	FZD3_LRP6	WNT agonist	WNT antagonist	WNT activation receptor	WNT inhibition receptor	KEGG: hsa04310; PMID: 23209147	Secreted Signaling	WNT2B - (FZD3+LRP6)
WNT2B_FZD4_LRP6	WNT2B_FZD4_LRP6	WNT	WNT2B	FZD4_LRP6	WNT agonist	WNT antagonist	WNT activation receptor	WNT inhibition receptor	KEGG: hsa04310; PMID: 23209147	Secreted Signaling	WNT2B - (FZD4+LRP6)
WNT2B_FZD5_LRP6	WNT2B_FZD5_LRP6	WNT	WNT2B	FZD5_LRP6	WNT agonist	WNT antagonist	WNT activation receptor	WNT inhibition receptor	KEGG: hsa04310; PMID: 23209147	Secreted Signaling	WNT2B - (FZD5+LRP6)
WNT2B_FZD6_LRP6	WNT2B_FZD6_LRP6	WNT	WNT2B	FZD6_LRP6	WNT agonist	WNT antagonist	WNT activation receptor	WNT inhibition receptor	KEGG: hsa04310; PMID: 23209147	Secreted Signaling	WNT2B - (FZD6+LRP6)
WNT2B_FZD7_LRP6	WNT2B_FZD7_LRP6	WNT	WNT2B	FZD7_LRP6	WNT agonist	WNT antagonist	WNT activation receptor	WNT inhibition receptor	KEGG: hsa04310; PMID: 23209147	Secreted Signaling	WNT2B - (FZD7+LRP6)
WNT2B_FZD8_LRP6	WNT2B_FZD8_LRP6	WNT	WNT2B	FZD8_LRP6	WNT agonist	WNT antagonist	WNT activation receptor	WNT inhibition receptor	KEGG: hsa04310; PMID: 23209147	Secreted Signaling	WNT2B - (FZD8+LRP6)
WNT2B_FZD9_LRP6	WNT2B_FZD9_LRP6	WNT	WNT2B	FZD9_LRP6	WNT agonist	WNT antagonist	WNT activation receptor	WNT inhibition receptor	KEGG: hsa04310; PMID: 23209147	Secreted Signaling	WNT2B - (FZD9+LRP6)
WNT7B_FZD1_LRP6	WNT7B_FZD1_LRP6	WNT	WNT7B	FZD1_LRP6	WNT agonist	WNT antagonist	WNT activation receptor	WNT inhibition receptor	KEGG: hsa04310; PMID: 23209147	Secreted Signaling	WNT7B - (FZD1+LRP6)
WNT7B_FZD2_LRP6	WNT7B_FZD2_LRP6	WNT	WNT7B	FZD2_LRP6	WNT agonist	WNT antagonist	WNT activation receptor	WNT inhibition receptor	KEGG: hsa04310; PMID: 23209147	Secreted Signaling	WNT7B - (FZD2+LRP6)
WNT7B_FZD3_LRP6	WNT7B_FZD3_LRP6	WNT	WNT7B	FZD3_LRP6	WNT agonist	WNT antagonist	WNT activation receptor	WNT inhibition receptor	KEGG: hsa04310; PMID: 23209147	Secreted Signaling	WNT7B - (FZD3+LRP6)
WNT7B_FZD4_LRP6	WNT7B_FZD4_LRP6	WNT	WNT7B	FZD4_LRP6	WNT agonist	WNT antagonist	WNT activation receptor	WNT inhibition receptor	KEGG: hsa04310; PMID: 23209147	Secreted Signaling	WNT7B - (FZD4+LRP6)
WNT7B_FZD5_LRP6	WNT7B_FZD5_LRP6	WNT	WNT7B	FZD5_LRP6	WNT agonist	WNT antagonist	WNT activation receptor	WNT inhibition receptor	KEGG: hsa04310; PMID: 23209147	Secreted Signaling	WNT7B - (FZD5+LRP6)
WNT7B_FZD6_LRP6	WNT7B_FZD6_LRP6	WNT	WNT7B	FZD6_LRP6	WNT agonist	WNT antagonist	WNT activation receptor	WNT inhibition receptor	KEGG: hsa04310; PMID: 23209147	Secreted Signaling	WNT7B - (FZD6+LRP6)
WNT7B_FZD7_LRP6	WNT7B_FZD7_LRP6	WNT	WNT7B	FZD7_LRP6	WNT agonist	WNT antagonist	WNT activation receptor	WNT inhibition receptor	KEGG: hsa04310; PMID: 23209147	Secreted Signaling	WNT7B - (FZD7+LRP6)
WNT7B_FZD8_LRP6	WNT7B_FZD8_LRP6	WNT	WNT7B	FZD8_LRP6	WNT agonist	WNT antagonist	WNT activation receptor	WNT inhibition receptor	KEGG: hsa04310; PMID: 23209147	Secreted Signaling	WNT7B - (FZD8+LRP6)
WNT7B_FZD9_LRP6	WNT7B_FZD9_LRP6	WNT	WNT7B	FZD9_LRP6	WNT agonist	WNT antagonist	WNT activation receptor	WNT inhibition receptor	KEGG: hsa04310; PMID: 23209147	Secreted Signaling	WNT7B - (FZD9+LRP6)
WNT5A_FZD1	WNT5A_FZD1	ncWNT	WNT5A	FZD1			ncWNT activation receptor		KEGG: hsa04310	Secreted Signaling	WNT5A - FZD1
WNT5A_FZD2	WNT5A_FZD2	ncWNT	WNT5A	FZD2			ncWNT activation receptor		KEGG: hsa04310	Secreted Signaling	WNT5A - FZD2
WNT5A_FZD3	WNT5A_FZD3	ncWNT	WNT5A	FZD3			ncWNT activation receptor		KEGG: hsa04310	Secreted Signaling	WNT5A - FZD3
WNT5A_FZD4	WNT5A_FZD4	ncWNT	WNT5A	FZD4			ncWNT activation receptor		KEGG: hsa04310	Secreted Signaling	WNT5A - FZD4
WNT5A_FZD5	WNT5A_FZD5	ncWNT	WNT5A	FZD5			ncWNT activation receptor		KEGG: hsa04310	Secreted Signaling	WNT5A - FZD5
WNT5A_FZD6	WNT5A_FZD6	ncWNT	WNT5A	FZD6			ncWNT activation receptor		KEGG: hsa04310	Secreted Signaling	WNT5A - FZD6
WNT5A_FZD7	WNT5A_FZD7	ncWNT	WNT5A	FZD7			ncWNT activation receptor		KEGG: hsa04310	Secreted Signaling	WNT5A - FZD7
WNT5A_FZD8	WNT5A_FZD8	ncWNT	WNT5A	FZD8			ncWNT activation receptor		KEGG: hsa04310	Secreted Signaling	WNT5A - FZD8
WNT5A_FZD9	WNT5A_FZD9	ncWNT	WNT5A	FZD9			ncWNT activation receptor		KEGG: hsa04310	Secreted Signaling	WNT5A - FZD9
WNT5A_MCAM	WNT5A_MCAM	ncWNT	WNT5A	MCAM					PMID: 24335906	Secreted Signaling	WNT5A - MCAM
WNT5B_FZD1	WNT5B_FZD1	ncWNT	WNT5B	FZD1			ncWNT activation receptor		KEGG: hsa04310	Secreted Signaling	WNT5B - FZD1
WNT5B_FZD2	WNT5B_FZD2	ncWNT	WNT5B	FZD2			ncWNT activation receptor		KEGG: hsa04310	Secreted Signaling	WNT5B - FZD2
WNT5B_FZD3	WNT5B_FZD3	ncWNT	WNT5B	FZD3			ncWNT activation receptor		KEGG: hsa04310	Secreted Signaling	WNT5B - FZD3
WNT5B_FZD4	WNT5B_FZD4	ncWNT	WNT5B	FZD4			ncWNT activation receptor		KEGG: hsa04310	Secreted Signaling	WNT5B - FZD4
WNT5B_FZD5	WNT5B_FZD5	ncWNT	WNT5B	FZD5			ncWNT activation receptor		KEGG: hsa04310	Secreted Signaling	WNT5B - FZD5
WNT5B_FZD6	WNT5B_FZD6	ncWNT	WNT5B	FZD6			ncWNT activation receptor		KEGG: hsa04310	Secreted Signaling	WNT5B - FZD6
WNT5B_FZD7	WNT5B_FZD7	ncWNT	WNT5B	FZD7			ncWNT activation receptor		KEGG: hsa04310	Secreted Signaling	WNT5B - FZD7
WNT5B_FZD8	WNT5B_FZD8	ncWNT	WNT5B	FZD8			ncWNT activation receptor		KEGG: hsa04310	Secreted Signaling	WNT5B - FZD8
WNT5B_FZD9	WNT5B_FZD9	ncWNT	WNT5B	FZD9			ncWNT activation receptor		KEGG: hsa04310	Secreted Signaling	WNT5B - FZD9
EGF_EGFR	EGF_EGFR	EGF	EGF	EGFR					KEGG: hsa04012	Secreted Signaling	EGF - EGFR
EGF_EGFR_ERBB2	EGF_EGFR_ERBB2	EGF	EGF	EGFR_ERBB2					KEGG: hsa04012	Secreted Signaling	EGF - (EGFR+ERBB2)
TGFA_EGFR	TGFA_EGFR	EGF	TGFA	EGFR					KEGG: hsa04012	Secreted Signaling	TGFA - EGFR
TGFA_EGFR_ERBB2	TGFA_EGFR_ERBB2	EGF	TGFA	EGFR_ERBB2					KEGG: hsa04012	Secreted Signaling	TGFA - (EGFR+ERBB2)
AREG_EGFR	AREG_EGFR	EGF	AREG	EGFR					KEGG: hsa04012	Secreted Signaling	AREG - EGFR
AREG_EGFR_ERBB2	AREG_EGFR_ERBB2	EGF	AREG	EGFR_ERBB2					KEGG: hsa04012	Secreted Signaling	AREG - (EGFR+ERBB2)
BTC_EGFR	BTC_EGFR	EGF	BTC	EGFR					KEGG: hsa04012	Secreted Signaling	BTC - EGFR
BTC_EGFR_ERBB2	BTC_EGFR_ERBB2	EGF	BTC	EGFR_ERBB2					KEGG: hsa04012	Secreted Signaling	BTC - (EGFR+ERBB2)
BTC_ERBB2_ERBB4	BTC_ERBB2_ERBB4	EGF	BTC	ERBB2_ERBB4					KEGG: hsa04012	Secreted Signaling	BTC - (ERBB2+ERBB4)
HBEGF_EGFR	HBEGF_EGFR	EGF	HBEGF	EGFR					KEGG: hsa04012	Secreted Signaling	HBEGF - EGFR
HBEGF_EGFR_ERBB2	HBEGF_EGFR_ERBB2	EGF	HBEGF	EGFR_ERBB2					KEGG: hsa04012	Secreted Signaling	HBEGF - (EGFR+ERBB2)
HBEGF_ERBB2_ERBB4	HBEGF_ERBB2_ERBB4	EGF	HBEGF	ERBB2_ERBB4					KEGG: hsa04012	Secreted Signaling	HBEGF - (ERBB2+ERBB4)
EREG_EGFR	EREG_EGFR	EGF	EREG	EGFR					KEGG: hsa04012	Secreted Signaling	EREG - EGFR
EREG_EGFR_ERBB2	EREG_EGFR_ERBB2	EGF	EREG	EGFR_ERBB2					KEGG: hsa04012	Secreted Signaling	EREG - (EGFR+ERBB2)
EREG_ERBB2_ERBB4	EREG_ERBB2_ERBB4	EGF	EREG	ERBB2_ERBB4					KEGG: hsa04012	Secreted Signaling	EREG - (ERBB2+ERBB4)
NRG1_ERBB3	NRG1_ERBB3	NRG	NRG1	ERBB3					KEGG: hsa04012	Secreted Signaling	NRG1 - ERBB3
NRG1_ERBB2_ERBB3	NRG1_ERBB2_ERBB3	NRG	NRG1	ERBB2_ERBB3					KEGG: hsa04012	Secreted Signaling	NRG1 - (ERBB2+ERBB3)
NRG1_ERBB2_ERBB4	NRG1_ERBB2_ERBB4	NRG	NRG1	ERBB2_ERBB4					KEGG: hsa04012	Secreted Signaling	NRG1 - (ERBB2+ERBB4)
NRG2_ERBB3	NRG2_ERBB3	NRG	NRG2	ERBB3					KEGG: hsa04012	Secreted Signaling	NRG2 - ERBB3
NRG2_ERBB2_ERBB3	NRG2_ERBB2_ERBB3	NRG	NRG2	ERBB2_ERBB3					KEGG: hsa04012	Secreted Signaling	NRG2 - (ERBB2+ERBB3)
NRG2_ERBB2_ERBB4	NRG2_ERBB2_ERBB4	NRG	NRG2	ERBB2_ERBB4					KEGG: hsa04012	Secreted Signaling	NRG2 - (ERBB2+ERBB4)
NRG1_ITGAV_ITGB3	NRG1_ITGAV_ITGB3	NRG	NRG1	ITGAV_ITGB3					PMID: 20682778	Secreted Signaling	NRG1 - (ITGAV+ITGB3)
FGF1_FGFR1	FGF1_FGFR1	FGF	FGF1	FGFR1				FGF inhibition receptor	PMC: 4393358	Secreted Signaling	FGF1 - FGFR1
FGF1_FGFR2	FGF1_FGFR2	FGF	FGF1	FGFR2				FGF inhibition receptor	PMC: 4393358	Secreted Signaling	FGF1 - FGFR2
FGF2_FGFR1	FGF2_FGFR1	FGF	FGF2	FGFR1				FGF inhibition receptor	PMC: 4393358	Secreted Signaling	FGF2 - FGFR1
FGF2_FGFR2	FGF2_FGFR2	FGF	FGF2	FGFR2				FGF inhibition receptor	PMC: 4393358	Secreted Signaling	FGF2 - FGFR2
FGF5_FGFR1	FGF5_FGFR1	FGF	FGF5	FGFR1				FGF inhibition receptor	PMC: 4393358	Secreted Signaling	FGF5 - FGFR1
FGF5_FGFR2	FGF5_FGFR2	FGF	FGF5	FGFR2				FGF inhibition receptor	PMC: 4393358	Secreted Signaling	FGF5 - FGFR2
FGF7_FGFR1	FGF7_FGFR1	FGF	FGF7	FGFR1				FGF inhibition receptor	PMC: 4393358	Secreted Signaling	FGF7 - FGFR1
FGF7_FGFR2	FGF7_FGFR2	FGF	FGF7	FGFR2				FGF inhibition receptor	PMC: 4393358	Secreted Signaling	FGF7 - FGFR2
FGF10_FGFR1	FGF10_FGFR1	FGF	FGF10	FGFR1				FGF inhibition receptor	PMC: 4393358	Secreted Signaling	FGF10 - FGFR1
FGF10_FGFR2	FGF10_FGFR2	FGF	FGF10	FGFR2				FGF inhibition receptor	PMC: 4393358	Secreted Signaling	FGF10 - FGFR2
FGF22_FGFR2	FGF22_FGFR2	FGF	FGF22	FGFR2				FGF inhibition receptor	PMC: 4393358	Secreted Signaling	FGF22 - FGFR2
FGF20_FGFR1	FGF20_FGFR1	FGF	FGF20	FGFR1				FGF inhibition receptor	PMC: 4393358	Secreted Signaling	FGF20 - FGFR1
FGF20_FGFR2	FGF20_FGFR2	FGF	FGF20	FGFR2				FGF inhibition receptor	PMC: 4393358	Secreted Signaling	FGF20 - FGFR2
FGF21_FGFR1	FGF21_FGFR1	FGF	FGF21	FGFR1			FGF activation receptor 2		PMC: 4393358	Secreted Signaling	FGF21 - FGFR1
PDGFA_PDGFRA	PDGFA_PDGFRA	PDGF	PDGFA	PDGFRA		PDGF antagonist			PMID: 15207812	Secreted Signaling	PDGFA - PDGFRA
PDGFA_PDGFRB	PDGFA_PDGFRB	PDGF	PDGFA	PDGFRB		PDGF antagonist			PMID: 15207812	Secreted Signaling	PDGFA - PDGFRB
PDGFC_PDGFRA	PDGFC_PDGFRA	PDGF	PDGFC	PDGFRA		PDGF antagonist			PMID: 15207812	Secreted Signaling	PDGFC - PDGFRA
PDGFD_PDGFRB	PDGFD_PDGFRB	PDGF	PDGFD	PDGFRB		PDGF antagonist			PMID: 15207812	Secreted Signaling	PDGFD - PDGFRB
IGF1_IGF1R	IGF1_IGF1R	IGF	IGF1	IGF1R		IGF antagonist			PMID: 14604834	Secreted Signaling	IGF1 - IGF1R
IGF1_ITGAV_ITGB3	IGF1_ITGAV_ITGB3	IGF	IGF1	ITGAV_ITGB3		IGF antagonist			PMID: 28190785; PMID: 28873464	Secreted Signaling	IGF1 - (ITGAV+ITGB3)
IGF1_ITGA6_ITGB4	IGF1_ITGA6_ITGB4	IGF	IGF1	ITGA6_ITGB4		IGF antagonist			PMID: 28190785; PMID: 28873464	Secreted Signaling	IGF1 - (ITGA6+ITGB4)
DHH_PTCH1	DHH_PTCH1	HH	DHH	PTCH1_SMO			HH activation receptor	HH inhibition receptor	KEGG: hsa04340; PMID: 25701396	Secreted Signaling	DHH - PTCH1
DHH_PTCH2	DHH_PTCH2	HH	DHH	PTCH2_SMO			HH activation receptor	HH inhibition receptor	KEGG: hsa04340; PMID: 25701396	Secreted Signaling	DHH - PTCH2
CCL25_ACKR4	CCL25_ACKR4	CCL	CCL25	ACKR4					KEGG: hsa04060	Secreted Signaling	CCL25 - ACKR4
CCL28_CCR10	CCL28_CCR10	CCL	CCL28	CCR10					KEGG: hsa04060	Secreted Signaling	CCL28 - CCR10
CCL1_ACKR4	CCL1_ACKR4	CCL	CCL1	ACKR4					KEGG: hsa04060	Secreted Signaling	CCL1 - ACKR4
CCL8_ACKR4	CCL8_ACKR4	CCL	CCL8	ACKR4					PMID: 26740381	Secreted Signaling	CCL8 - ACKR4
PF4V1_CXCR3	PF4V1_CXCR3	CXCL	PF4V1	CXCR3					KEGG: hsa04060	Secreted Signaling	PF4V1 - CXCR3
CXCL10_CXCR3	CXCL10_CXCR3	CXCL	CXCL10	CXCR3					KEGG: hsa04060	Secreted Signaling	CXCL10 - CXCR3
CXCL11_CXCR3	CXCL11_CXCR3	CXCL	CXCL11	CXCR3					KEGG: hsa04060	Secreted Signaling	CXCL11 - CXCR3
PF4_CXCR3	PF4_CXCR3	CXCL	PF4	CXCR3					KEGG: hsa04060	Secreted Signaling	PF4 - CXCR3
CXCL12_CXCR4	CXCL12_CXCR4	CXCL	CXCL12	CXCR4					KEGG: hsa04060	Secreted Signaling	CXCL12 - CXCR4
CXCL11_ACKR3	CXCL11_ACKR3	CXCL	CXCL11	ACKR3					KEGG: hsa04060	Secreted Signaling	CXCL11 - ACKR3
CXCL12_ACKR3	CXCL12_ACKR3	CXCL	CXCL12	ACKR3					KEGG: hsa04060	Secreted Signaling	CXCL12 - ACKR3
MIF_CD74_CXCR4	MIF_CD74_CXCR4	MIF	MIF	CD74_CXCR4					PMID: 29637711; PMID: 24760155	Secreted Signaling	MIF - (CD74+CXCR4)
MIF_CD74_CD44	MIF_CD74_CD44	MIF	MIF	CD74_CD44					PMID: 29637711; PMID: 26175090	Secreted Signaling	MIF - (CD74+CD44)
MIF_CD74_CXCR2	MIF_CD74_CXCR2	MIF	MIF	CD74_CXCR2					PMID: 29637711; PMID: 26175090	Secreted Signaling	MIF - (CD74+CXCR2)
MIF_ACKR3	MIF_ACKR3	MIF	MIF	ACKR3					PMID: 26175090	Secreted Signaling	MIF - ACKR3
IL4_IL4R_IL2RG	IL4_IL4R_IL2RG	IL2	IL4	IL4R_IL2RG					KEGG: hsa04060	Secreted Signaling	IL4 - (IL4R+IL2RG)
IL7_IL7R_IL2RG	IL7_IL7R_IL2RG	IL2	IL7	IL7R_IL2RG					KEGG: hsa04060	Secreted Signaling	IL7 - (IL7R+IL2RG)
IL15_IL15RA_IL2RB	IL15_IL15RA_IL2RB	IL2	IL15	IL15RA_IL2RB					KEGG: hsa04060	Secreted Signaling	IL15 - (IL15RA+IL2RB)
TSLP_IL7R_CRLF2	TSLP_IL7R_CRLF2	IL2	TSLP	IL7R_CRLF2					KEGG: hsa04060	Secreted Signaling	TSLP - (IL7R+CRLF2)
IL4_IL4R	IL4_IL4R	IL4	IL4	IL4R					KEGG: hsa04060	Secreted Signaling	IL4 - IL4R
IL4_IL4R_IL13RA1	IL4_IL4R_IL13RA1	IL4	IL4	IL4R_IL13RA1					KEGG: hsa04060	Secreted Signaling	IL4 - (IL4R+IL13RA1)
IL4_IL4R_IL13RA2	IL4_IL4R_IL13RA2	IL4	IL4	IL4R_IL13RA2					KEGG: hsa04060	Secreted Signaling	IL4 - (IL4R+IL13RA2)
IL6_IL6R_IL6ST	IL6_IL6R_IL6ST	IL6	IL6	IL6R_IL6ST					KEGG: hsa04060	Secreted Signaling	IL6 - (IL6R+IL6ST)
IL11_IL11RA_IL6ST	IL11_IL11RA_IL6ST	IL6	IL11	IL11R complex					KEGG: hsa04060	Secreted Signaling	IL11 - (IL11RA+IL6ST)
CLCF1_CNTFR_LIFR	CLCF1_CNTFR_LIFR	LIFR	CLCF1	CNTFR_LIFR					KEGG: hsa04060	Secreted Signaling	CLCF1 - (CNTFR+LIFR)
CTF1_LIFR_IL6ST	CTF1_LIFR_IL6ST	LIFR	CTF1	LIFR_IL6ST					KEGG: hsa04060	Secreted Signaling	CTF1 - (LIFR+IL6ST)
LIF_LIFR_IL6ST	LIF_LIFR_IL6ST	LIFR	LIF	LIFR_IL6ST					KEGG: hsa04060	Secreted Signaling	LIF - (LIFR+IL6ST)
IL19_IL20RA_IL20RB	IL19_IL20RA_IL20RB	IL10	IL19	IL20RA_IL20RB					KEGG: hsa04060	Secreted Signaling	IL19 - (IL20RA+IL20RB)
IL24_IL20RA_IL20RB	IL24_IL20RA_IL20RB	IL10	IL24	IL20RA_IL20RB					KEGG: hsa04060	Secreted Signaling	IL24 - (IL20RA+IL20RB)
IL24_IL22RA1_IL20RB	IL24_IL22RA1_IL20RB	IL10	IL24	IL22RA1_IL20RB					KEGG: hsa04060	Secreted Signaling	IL24 - (IL22RA1+IL20RB)
IL1A_IL1R1_IL1RAP	IL1A_IL1R1_IL1RAP	IL1	IL1A	IL1R1_IL1RAP		IL antagonist			KEGG: hsa04060	Secreted Signaling	IL1A - (IL1R1+IL1RAP)
IL1B_IL1R1_IL1RAP	IL1B_IL1R1_IL1RAP	IL1	IL1B	IL1R1_IL1RAP		IL antagonist			KEGG: hsa04060	Secreted Signaling	IL1B - (IL1R1+IL1RAP)
IL1A_IL1R2	IL1A_IL1R2	IL1	IL1A	IL1R2					KEGG: hsa04060	Secreted Signaling	IL1A - IL1R2
IL1B_IL1R2	IL1B_IL1R2	IL1	IL1B	IL1R2					KEGG: hsa04060	Secreted Signaling	IL1B - IL1R2
IL37_IL18R1_IL18RAP	IL37_IL18R1_IL18RAP	IL1	IL37	IL18R1_IL18RAP					KEGG: hsa04060	Secreted Signaling	IL37 - (IL18R1+IL18RAP)
IL18_IL18R1_IL18RAP	IL18_IL18R1_IL18RAP	IL1	IL18	IL18R1_IL18RAP					KEGG: hsa04060	Secreted Signaling	IL18 - (IL18R1+IL18RAP)
IL33_IL1RL1_IL1RAP	IL33_IL1RL1_IL1RAP	IL1	IL33	IL1RL1_IL1RAP					KEGG: hsa04060	Secreted Signaling	IL33 - (IL1RL1+IL1RAP)
IL17C_IL17RA_IL17RE	IL17C_IL17RA_IL17RE	IL17	IL17C	IL17RA_IL17RE					KEGG: hsa04060	Secreted Signaling	IL17C - (IL17RA+IL17RE)
IL34_CSF1R	IL34_CSF1R	CSF	IL34	CSF1R					KEGG: hsa04060	Secreted Signaling	IL34 - CSF1R
CSF1_CSF1R	CSF1_CSF1R	CSF	CSF1	CSF1R					KEGG: hsa04060	Secreted Signaling	CSF1 - CSF1R
IL16_CD4	IL16_CD4	IL16	IL16	CD4					KEGG: hsa04060	Secreted Signaling	IL16 - CD4
CSF3_CSF3R	CSF3_CSF3R	CSF3	CSF3	CSF3R					KEGG: hsa04060	Secreted Signaling	CSF3 - CSF3R
IFNE_IFNAR1_IFNAR2	IFNE_IFNAR1_IFNAR2	IFN-I	IFNE	IFNAR1_IFNAR2					KEGG: hsa04060	Secreted Signaling	IFNE - (IFNAR1+IFNAR2)
TNF_TNFRSF1A	TNF_TNFRSF1A	TNF	TNF	TNFRSF1A					KEGG: hsa04060	Secreted Signaling	TNF - TNFRSF1A
TNF_TNFRSF1B	TNF_TNFRSF1B	TNF	TNF	TNFRSF1B					KEGG: hsa04060	Secreted Signaling	TNF - TNFRSF1B
TNFSF14_LTBR	TNFSF14_LTBR	LIGHT	TNFSF14	LTBR					KEGG: hsa04060	Secreted Signaling	TNFSF14 - LTBR
TNFSF14_TNFRSF14	TNFSF14_TNFRSF14	LIGHT	TNFSF14	TNFRSF14					KEGG: hsa04060	Secreted Signaling	TNFSF14 - TNFRSF14
TNFSF15_TNFRSF25	TNFSF15_TNFRSF25	VEGI	TNFSF15	TNFRSF25					KEGG: hsa04060	Secreted Signaling	TNFSF15 - TNFRSF25
TNFSF10_TNFRSF10B	TNFSF10_TNFRSF10B	TRAIL	TNFSF10	TNFRSF10A					KEGG: hsa04060	Secreted Signaling	TNFSF10 - TNFRSF10B
TNFSF12_TNFRSF12A	TNFSF12_TNFRSF12A	TWEAK	TNFSF12	TNFRSF12A					KEGG: hsa04060	Secreted Signaling	TNFSF12 - TNFRSF12A
TNFSF13B_TNFRSF13C	TNFSF13B_TNFRSF13C	BAFF	TNFSF13B	TNFRSF13C					KEGG: hsa04060	Secreted Signaling	TNFSF13B - TNFRSF13C
NAMPT_INSR	NAMPT_INSR	VISFATIN	NAMPT	INSR					PMID: 28490838	Secreted Signaling	NAMPT - INSR
NAMPT_ITGA5_ITGB1	NAMPT_ITGA5_ITGB1	VISFATIN	NAMPT	ITGA5_ITGB1					PMID: 28490838	Secreted Signaling	NAMPT - (ITGA5+ITGB1)
ANGPTL1_ITGA1_ITGB1	ANGPTL1_ITGA1_ITGB1	ANGPTL	ANGPTL1	ITGA1_ITGB1					PMID: 24478758	Secreted Signaling	ANGPTL1 - (ITGA1+ITGB1)
ANGPTL2_ITGA5_ITGB1	ANGPTL2_ITGA5_ITGB1	ANGPTL	ANGPTL2	ITGA5_ITGB1					PMID: 24478758	Secreted Signaling	ANGPTL2 - (ITGA5+ITGB1)
ANGPTL2_TLR4	ANGPTL2_TLR4	ANGPTL	ANGPTL2	TLR4					PMID: 24478758	Secreted Signaling	ANGPTL2 - TLR4
ANGPTL4_ITGA5_ITGB1	ANGPTL4_ITGA5_ITGB1	ANGPTL	ANGPTL4	ITGA5_ITGB1					PMID: 30049845	Secreted Signaling	ANGPTL4 - (ITGA5+ITGB1)
ANGPTL4_ITGAV_ITGB3	ANGPTL4_ITGAV_ITGB3	ANGPTL	ANGPTL4	ITGAV_ITGB3					PMID: 30049845	Secreted Signaling	ANGPTL4 - (ITGAV+ITGB3)
ANGPTL4_CDH11	ANGPTL4_CDH11	ANGPTL	ANGPTL4	CDH11					PMID: 30049845	Secreted Signaling	ANGPTL4 - CDH11
ANGPTL4_SDC1	ANGPTL4_SDC1	ANGPTL	ANGPTL4	SDC1					PMID: 29017031	Secreted Signaling	ANGPTL4 - SDC1
ANGPTL4_SDC2	ANGPTL4_SDC2	ANGPTL	ANGPTL4	SDC2					PMID: 29017031	Secreted Signaling	ANGPTL4 - SDC2
ANGPTL4_SDC3	ANGPTL4_SDC3	ANGPTL	ANGPTL4	SDC3					PMID: 29017031	Secreted Signaling	ANGPTL4 - SDC3
ANGPTL4_SDC4	ANGPTL4_SDC4	ANGPTL	ANGPTL4	SDC4					PMID: 29017031	Secreted Signaling	ANGPTL4 - SDC4
ANGPTL3_ITGAV_ITGB3	ANGPTL3_ITGAV_ITGB3	ANGPTL	ANGPTL3	ITGAV_ITGB3					PMID: 11877390	Secreted Signaling	ANGPTL3 - (ITGAV+ITGB3)
MDK_SDC1	MDK_SDC1	MK	MDK	SDC1					PMID: 28356350	Secreted Signaling	MDK - SDC1
MDK_SDC2	MDK_SDC2	MK	MDK	SDC2					PMID: 28356350	Secreted Signaling	MDK - SDC2
MDK_SDC4	MDK_SDC4	MK	MDK	SDC4					PMID: 28356350	Secreted Signaling	MDK - SDC4
MDK_ITGA4_ITGB1	MDK_ITGA4_ITGB1	MK	MDK	ITGA4_ITGB1					PMID: 28356350	Secreted Signaling	MDK - (ITGA4+ITGB1)
MDK_ITGA6_ITGB1	MDK_ITGA6_ITGB1	MK	MDK	ITGA6_ITGB1					PMID: 28356350	Secreted Signaling	MDK - (ITGA6+ITGB1)
MDK_LRP1	MDK_LRP1	MK	MDK	LRP1					PMID: 28356350	Secreted Signaling	MDK - LRP1
MDK_NCL	MDK_NCL	MK	MDK	NCL					PMID: 28356350	Secreted Signaling	MDK - NCL
PTN_SDC1	PTN_SDC1	PTN	PTN	SDC1					PMID: 28356350; PMID: 25620911	Secreted Signaling	PTN - SDC1
PTN_SDC2	PTN_SDC2	PTN	PTN	SDC2					PMID: 28356350; PMID: 25620911	Secreted Signaling	PTN - SDC2
PTN_SDC3	PTN_SDC3	PTN	PTN	SDC3					PMID: 28356350; PMID: 25620911	Secreted Signaling	PTN - SDC3
PTN_SDC4	PTN_SDC4	PTN	PTN	SDC4					PMID: 28356350; PMID: 25620911	Secreted Signaling	PTN - SDC4
PTN_ITGAV_ITGB3	PTN_ITGAV_ITGB3	PTN	PTN	ITGAV_ITGB3					PMID: 28356350; PMID: 25620911	Secreted Signaling	PTN - (ITGAV+ITGB3)
PTN_NCL	PTN_NCL	PTN	PTN	NCL					PMID: 28356350; PMID: 25620911	Secreted Signaling	PTN - NCL
POSTN_ITGAV_ITGB3	POSTN_ITGAV_ITGB3	PERIOSTIN	POSTN	ITGAV_ITGB3					PMID: 26721738	Secreted Signaling	POSTN - (ITGAV+ITGB3)
POSTN_ITGAV_ITGB5	POSTN_ITGAV_ITGB5	PERIOSTIN	POSTN	ITGAV_ITGB5					PMID: 26721738	Secreted Signaling	POSTN - (ITGAV+ITGB5)
GRP_GRPR	GRP_GRPR	GPR	GRP	GRPR					KEGG: hsa04080	Secreted Signaling	GRP - GRPR
NMB_NMBR	NMB_NMBR	GPR	NMB	NMBR					KEGG: hsa04080	Secreted Signaling	NMB - NMBR
KNG1_BDKRB1	KNG1_BDKRB1	BRADYKININ	KNG1	BDKRB1					KEGG: hsa04080	Secreted Signaling	KNG1 - BDKRB1
KNG1_BDKRB2	KNG1_BDKRB2	BRADYKININ	KNG1	BDKRB2					KEGG: hsa04080	Secreted Signaling	KNG1 - BDKRB2
C3_C3AR1	C3_C3AR1	COMPLEMENT	C3	C3AR1					KEGG: hsa04080	Secreted Signaling	C3 - C3AR1
C3_ITGAM_ITGB2	C3_ITGAM_ITGB2	COMPLEMENT	C3	ITGAM_ITGB2					PMID: 16234578	Secreted Signaling	C3 - (ITGAM+ITGB2)
C3_ITGAX_ITGB2	C3_ITGAX_ITGB2	COMPLEMENT	C3	ITGAX_ITGB2					PMID: 16234578	Secreted Signaling	C3 - (ITGAX+ITGB2)
HC_C5AR1	HC_C5AR1	COMPLEMENT	C5	C5AR1					KEGG: hsa04080	Secreted Signaling	HC - C5AR1
EDN1_EDNRA	EDN1_EDNRA	EDN	EDN1	EDNRA					KEGG: hsa04080	Secreted Signaling	EDN1 - EDNRA
EDN1_EDNRB	EDN1_EDNRB	EDN	EDN1	EDNRB					KEGG: hsa04080	Secreted Signaling	EDN1 - EDNRB
NMU_NMUR1	NMU_NMUR1	NMU	NMU	NMUR1					KEGG: hsa04080	Secreted Signaling	NMU - NMUR1
PENK_OPRL1	PENK_OPRL1	OPIOID	PENK	OPRL1					KEGG: hsa04080	Secreted Signaling	PENK - OPRL1
POMC_OPRL1	POMC_OPRL1	OPIOID	POMC	OPRL1					KEGG: hsa04080	Secreted Signaling	POMC - OPRL1
HCRT_HCRTR2	HCRT_HCRTR2	HCRT	HCRT	HCRTR2					KEGG: hsa04080	Secreted Signaling	HCRT - HCRTR2
OXT_OXTR	OXT_OXTR	OXT	OXT	OXTR					KEGG: hsa04080	Secreted Signaling	OXT - OXTR
SST_SSTR1	SST_SSTR1	SOMATOSTATIN	SST	SSTR1					KEGG: hsa04080	Secreted Signaling	SST - SSTR1
SST_SSTR2	SST_SSTR2	SOMATOSTATIN	SST	SSTR2					KEGG: hsa04080	Secreted Signaling	SST - SSTR2
CORT_SSTR1	CORT_SSTR1	SOMATOSTATIN	CORT	SSTR1					KEGG: hsa04080	Secreted Signaling	CORT - SSTR1
CORT_SSTR2	CORT_SSTR2	SOMATOSTATIN	CORT	SSTR2					KEGG: hsa04080	Secreted Signaling	CORT - SSTR2
TAC1_TACR2	TAC1_TACR2	TAC	TAC1	TACR2					KEGG: hsa04080	Secreted Signaling	TAC1 - TACR2
NPPC_NPR2	NPPC_NPR2	NPR2	NPPC	NPR2					KEGG: hsa04080; PMID: 29934642	Secreted Signaling	NPPC - NPR2
BDNF_NTRK2	BDNF_NTRK2	NT	BDNF	NTRK2			NGFR activation receptor		PMID: 27908981	Secreted Signaling	BDNF - NTRK2
HGF_MET	HGF_MET	HGF	HGF	MET					PMID: 28475121	Secreted Signaling	HGF - MET
NTF3_NTRK2	NTF3_NTRK2	NT	NTF3	NTRK2			NGFR activation receptor		PMID: 27908981	Secreted Signaling	NTF3 - NTRK2
SEMA3A_NRP1_PLXNA1	SEMA3A_NRP1_PLXNA1	SEMA3	SEMA3A	NRP1_PLXNA1					PMID: 27533782	Secreted Signaling	SEMA3A - (NRP1+PLXNA1)
SEMA3A_NRP1_PLXNA2	SEMA3A_NRP1_PLXNA2	SEMA3	SEMA3A	NRP1_PLXNA2					PMID: 27533782	Secreted Signaling	SEMA3A - (NRP1+PLXNA2)
SEMA3A_NRP1_PLXNA3	SEMA3A_NRP1_PLXNA3	SEMA3	SEMA3A	NRP1_PLXNA3					PMID: 27533782	Secreted Signaling	SEMA3A - (NRP1+PLXNA3)
SEMA3A_NRP1_PLXNA4	SEMA3A_NRP1_PLXNA4	SEMA3	SEMA3A	NRP1_PLXNA4					PMID: 27533782	Secreted Signaling	SEMA3A - (NRP1+PLXNA4)
SEMA3B_NRP1_PLXNA1	SEMA3B_NRP1_PLXNA1	SEMA3	SEMA3B	NRP1_PLXNA1					PMID: 27533782	Secreted Signaling	SEMA3B - (NRP1+PLXNA1)
SEMA3B_NRP1_PLXNA2	SEMA3B_NRP1_PLXNA2	SEMA3	SEMA3B	NRP1_PLXNA2					PMID: 27533782	Secreted Signaling	SEMA3B - (NRP1+PLXNA2)
SEMA3B_NRP1_PLXNA3	SEMA3B_NRP1_PLXNA3	SEMA3	SEMA3B	NRP1_PLXNA3					PMID: 27533782	Secreted Signaling	SEMA3B - (NRP1+PLXNA3)
SEMA3B_NRP1_PLXNA4	SEMA3B_NRP1_PLXNA4	SEMA3	SEMA3B	NRP1_PLXNA4					PMID: 27533782	Secreted Signaling	SEMA3B - (NRP1+PLXNA4)
SEMA3C_NRP1_PLXNA1	SEMA3C_NRP1_PLXNA1	SEMA3	SEMA3C	NRP1_PLXNA1					PMID: 27533782	Secreted Signaling	SEMA3C - (NRP1+PLXNA1)
SEMA3C_NRP1_PLXNA2	SEMA3C_NRP1_PLXNA2	SEMA3	SEMA3C	NRP1_PLXNA2					PMID: 27533782	Secreted Signaling	SEMA3C - (NRP1+PLXNA2)
SEMA3C_NRP1_PLXNA3	SEMA3C_NRP1_PLXNA3	SEMA3	SEMA3C	NRP1_PLXNA3					PMID: 27533782	Secreted Signaling	SEMA3C - (NRP1+PLXNA3)
SEMA3C_NRP1_PLXNA4	SEMA3C_NRP1_PLXNA4	SEMA3	SEMA3C	NRP1_PLXNA4					PMID: 27533782	Secreted Signaling	SEMA3C - (NRP1+PLXNA4)
SEMA3D_NRP1_PLXNA1	SEMA3D_NRP1_PLXNA1	SEMA3	SEMA3D	NRP1_PLXNA1					PMID: 27533782	Secreted Signaling	SEMA3D - (NRP1+PLXNA1)
SEMA3D_NRP1_PLXNA2	SEMA3D_NRP1_PLXNA2	SEMA3	SEMA3D	NRP1_PLXNA2					PMID: 27533782	Secreted Signaling	SEMA3D - (NRP1+PLXNA2)
SEMA3D_NRP1_PLXNA3	SEMA3D_NRP1_PLXNA3	SEMA3	SEMA3D	NRP1_PLXNA3					PMID: 27533782	Secreted Signaling	SEMA3D - (NRP1+PLXNA3)
SEMA3D_NRP1_PLXNA4	SEMA3D_NRP1_PLXNA4	SEMA3	SEMA3D	NRP1_PLXNA4					PMID: 27533782	Secreted Signaling	SEMA3D - (NRP1+PLXNA4)
SEMA3B_NRP2_PLXNA1	SEMA3B_NRP2_PLXNA1	SEMA3	SEMA3B	NRP2_PLXNA1					PMID: 27533782	Secreted Signaling	SEMA3B - (NRP2+PLXNA1)
SEMA3B_NRP2_PLXNA2	SEMA3B_NRP2_PLXNA2	SEMA3	SEMA3B	NRP2_PLXNA2					PMID: 27533782	Secreted Signaling	SEMA3B - (NRP2+PLXNA2)
SEMA3B_NRP2_PLXNA3	SEMA3B_NRP2_PLXNA3	SEMA3	SEMA3B	NRP2_PLXNA3					PMID: 27533782	Secreted Signaling	SEMA3B - (NRP2+PLXNA3)
SEMA3B_NRP2_PLXNA4	SEMA3B_NRP2_PLXNA4	SEMA3	SEMA3B	NRP2_PLXNA4					PMID: 27533782	Secreted Signaling	SEMA3B - (NRP2+PLXNA4)
SEMA3C_NRP2_PLXNA1	SEMA3C_NRP2_PLXNA1	SEMA3	SEMA3C	NRP2_PLXNA1					PMID: 27533782	Secreted Signaling	SEMA3C - (NRP2+PLXNA1)
SEMA3C_NRP2_PLXNA2	SEMA3C_NRP2_PLXNA2	SEMA3	SEMA3C	NRP2_PLXNA2					PMID: 27533782	Secreted Signaling	SEMA3C - (NRP2+PLXNA2)
SEMA3C_NRP2_PLXNA3	SEMA3C_NRP2_PLXNA3	SEMA3	SEMA3C	NRP2_PLXNA3					PMID: 27533782	Secreted Signaling	SEMA3C - (NRP2+PLXNA3)
SEMA3C_NRP2_PLXNA4	SEMA3C_NRP2_PLXNA4	SEMA3	SEMA3C	NRP2_PLXNA4					PMID: 27533782	Secreted Signaling	SEMA3C - (NRP2+PLXNA4)
SEMA3D_NRP2_PLXNA1	SEMA3D_NRP2_PLXNA1	SEMA3	SEMA3D	NRP2_PLXNA1					PMID: 27533782	Secreted Signaling	SEMA3D - (NRP2+PLXNA1)
SEMA3D_NRP2_PLXNA2	SEMA3D_NRP2_PLXNA2	SEMA3	SEMA3D	NRP2_PLXNA2					PMID: 27533782	Secreted Signaling	SEMA3D - (NRP2+PLXNA2)
SEMA3D_NRP2_PLXNA3	SEMA3D_NRP2_PLXNA3	SEMA3	SEMA3D	NRP2_PLXNA3					PMID: 27533782	Secreted Signaling	SEMA3D - (NRP2+PLXNA3)
SEMA3D_NRP2_PLXNA4	SEMA3D_NRP2_PLXNA4	SEMA3	SEMA3D	NRP2_PLXNA4					PMID: 27533782	Secreted Signaling	SEMA3D - (NRP2+PLXNA4)
SEMA3F_NRP2_PLXNA1	SEMA3F_NRP2_PLXNA1	SEMA3	SEMA3F	NRP2_PLXNA1					PMID: 27533782	Secreted Signaling	SEMA3F - (NRP2+PLXNA1)
SEMA3F_NRP2_PLXNA2	SEMA3F_NRP2_PLXNA2	SEMA3	SEMA3F	NRP2_PLXNA2					PMID: 27533782	Secreted Signaling	SEMA3F - (NRP2+PLXNA2)
SEMA3F_NRP2_PLXNA3	SEMA3F_NRP2_PLXNA3	SEMA3	SEMA3F	NRP2_PLXNA3					PMID: 27533782	Secreted Signaling	SEMA3F - (NRP2+PLXNA3)
SEMA3F_NRP2_PLXNA4	SEMA3F_NRP2_PLXNA4	SEMA3	SEMA3F	NRP2_PLXNA4					PMID: 27533782	Secreted Signaling	SEMA3F - (NRP2+PLXNA4)
SEMA3G_NRP2_PLXNA1	SEMA3G_NRP2_PLXNA1	SEMA3	SEMA3G	NRP2_PLXNA1					PMID: 27533782	Secreted Signaling	SEMA3G - (NRP2+PLXNA1)
SEMA3G_NRP2_PLXNA2	SEMA3G_NRP2_PLXNA2	SEMA3	SEMA3G	NRP2_PLXNA2					PMID: 27533782	Secreted Signaling	SEMA3G - (NRP2+PLXNA2)
SEMA3G_NRP2_PLXNA3	SEMA3G_NRP2_PLXNA3	SEMA3	SEMA3G	NRP2_PLXNA3					PMID: 27533782	Secreted Signaling	SEMA3G - (NRP2+PLXNA3)
SEMA3G_NRP2_PLXNA4	SEMA3G_NRP2_PLXNA4	SEMA3	SEMA3G	NRP2_PLXNA4					PMID: 27533782	Secreted Signaling	SEMA3G - (NRP2+PLXNA4)
SEMA3C_NRP1_NRP2	SEMA3C_NRP1_NRP2	SEMA3	SEMA3C	NRP1_NRP2					PMID: 27533782	Secreted Signaling	SEMA3C - (NRP1+NRP2)
SEMA3C_PLXND1	SEMA3C_PLXND1	SEMA3	SEMA3C	PLXND1					PMID: 27533782	Secreted Signaling	SEMA3C - PLXND1
ANXA1_FPR2	ANXA1_FPR2	ANNEXIN	ANXA1	FPR2					PMID: 23230437	Secreted Signaling	ANXA1 - FPR2
ANXA1_FPR1	ANXA1_FPR1	ANNEXIN	ANXA1	FPR1					PMID: 23230437	Secreted Signaling	ANXA1 - FPR1
ENHO_GPR19	ENHO_GPR19	ENHO	ENHO	GPR19					PMID: 28476646	Secreted Signaling	ENHO - GPR19
GAS6_AXL	GAS6_AXL	GAS	GAS6	AXL					PMID: 27801848	Secreted Signaling	GAS6 - AXL
GAS6_TYRO3	GAS6_TYRO3	GAS	GAS6	TYRO3					PMID: 27801848	Secreted Signaling	GAS6 - TYRO3
GCG_GLP2R	GCG_GLP2R	GCG	GCG	GLP2R					KEGG: hsa04080	Secreted Signaling	GCG - GLP2R
GRN_SORT1	GRN_SORT1	GRN	GRN	SORT1					PMID: 29555433	Secreted Signaling	GRN - SORT1
LEP_LEPR	LEP_LEPR	LEP	LEP	LEPR					KEGG: hsa04080	Secreted Signaling	LEP - LEPR
OSTN_NPR3	OSTN_NPR3	OSTN	OSTN	NPR3					PMID: 29326144	Secreted Signaling	OSTN - NPR3
PROS1_AXL	PROS1_AXL	PROS	PROS1	AXL					PMID: 29531161	Secreted Signaling	PROS1 - AXL
PROS1_TYRO3	PROS1_TYRO3	PROS	PROS1	TYRO3					PMID: 30501104	Secreted Signaling	PROS1 - TYRO3
PSAP_GPR37	PSAP_GPR37	PSAP	PSAP	GPR37					PMID: 23690594	Secreted Signaling	PSAP - GPR37
PTHLH_PTH1R	PTHLH_PTH1R	PTH	PTHLH	PTH1R					PMID: 29577935	Secreted Signaling	PTHLH - PTH1R
RARRES2_GPR1	RARRES2_GPR1	CHEMERIN	RARRES2	GPR1					PMID: 24671882	Secreted Signaling	RARRES2 - GPR1
RARRES2_CMKLR1	RARRES2_CMKLR1	CHEMERIN	RARRES2	CMKLR1					PMID: 24671882	Secreted Signaling	RARRES2 - CMKLR1
SAA1_FPR2	SAA1_FPR2	SAA	SAA1	FPR2					PMID: 22610094	Secreted Signaling	SAA1 - FPR2
BAG6_NCR3-PS	BAG6_NCR3-PS	BAG	BAG6	NCR3					PMID: 30021652	Secreted Signaling	BAG6 - NCR3-PS
LGALS9_CD44	LGALS9_CD44	GALECTIN	LGALS9	CD44					PMID: 25065622	Secreted Signaling	LGALS9 - CD44
ligand-Receptor analysis of Sample CTRL
TGFB1_TGFBR1_TGFBR2	TGFB1_TGFBR1_TGFBR2	TGFb	TGFB1	TGFbR1_R2	TGFb agonist	TGFb antagonist		TGFb inhibition receptor	KEGG: hsa04350	Secreted Signaling	TGFB1 - (TGFBR1+TGFBR2)
TGFB2_TGFBR1_TGFBR2	TGFB2_TGFBR1_TGFBR2	TGFb	TGFB2	TGFbR1_R2	TGFb agonist	TGFb antagonist		TGFb inhibition receptor	KEGG: hsa04350	Secreted Signaling	TGFB2 - (TGFBR1+TGFBR2)
TGFB3_TGFBR1_TGFBR2	TGFB3_TGFBR1_TGFBR2	TGFb	TGFB3	TGFbR1_R2	TGFb agonist	TGFb antagonist		TGFb inhibition receptor	KEGG: hsa04350	Secreted Signaling	TGFB3 - (TGFBR1+TGFBR2)
TGFB1_ACVR1B_TGFBR2	TGFB1_ACVR1B_TGFBR2	TGFb	TGFB1	ACVR1B_TGFbR2	TGFb agonist	TGFb antagonist		TGFb inhibition receptor	PMID: 27449815	Secreted Signaling	TGFB1 - (ACVR1B+TGFBR2)
TGFB1_ACVR1C_TGFBR2	TGFB1_ACVR1C_TGFBR2	TGFb	TGFB1	ACVR1C_TGFbR2	TGFb agonist	TGFb antagonist		TGFb inhibition receptor	PMID: 27449815	Secreted Signaling	TGFB1 - (ACVR1C+TGFBR2)
TGFB2_ACVR1B_TGFBR2	TGFB2_ACVR1B_TGFBR2	TGFb	TGFB2	ACVR1B_TGFbR2	TGFb agonist	TGFb antagonist		TGFb inhibition receptor	PMID: 27449815	Secreted Signaling	TGFB2 - (ACVR1B+TGFBR2)
TGFB2_ACVR1C_TGFBR2	TGFB2_ACVR1C_TGFBR2	TGFb	TGFB2	ACVR1C_TGFbR2	TGFb agonist	TGFb antagonist		TGFb inhibition receptor	PMID: 27449815	Secreted Signaling	TGFB2 - (ACVR1C+TGFBR2)
TGFB3_ACVR1B_TGFBR2	TGFB3_ACVR1B_TGFBR2	TGFb	TGFB3	ACVR1B_TGFbR2	TGFb agonist	TGFb antagonist		TGFb inhibition receptor	PMID: 27449815	Secreted Signaling	TGFB3 - (ACVR1B+TGFBR2)
TGFB3_ACVR1C_TGFBR2	TGFB3_ACVR1C_TGFBR2	TGFb	TGFB3	ACVR1C_TGFbR2	TGFb agonist	TGFb antagonist		TGFb inhibition receptor	PMID: 27449815	Secreted Signaling	TGFB3 - (ACVR1C+TGFBR2)
TGFB1_ACVR1_TGFBR1	TGFB1_ACVR1_TGFBR1	TGFb	TGFB1	ACVR1_TGFbR					PMID: 29376829	Secreted Signaling	TGFB1 - (ACVR1+TGFBR1)
TGFB2_ACVR1_TGFBR1	TGFB2_ACVR1_TGFBR1	TGFb	TGFB2	ACVR1_TGFbR					PMID: 29376829	Secreted Signaling	TGFB2 - (ACVR1+TGFBR1)
TGFB3_ACVR1_TGFBR1	TGFB3_ACVR1_TGFBR1	TGFb	TGFB3	ACVR1_TGFbR					PMID: 29376829	Secreted Signaling	TGFB3 - (ACVR1+TGFBR1)
BMP2_BMPR1A_ACVR2A	BMP2_BMPR1A_ACVR2A	BMP	BMP2	BMPR1A_ACVR2A		BMP antagonist		BMP inhibition receptor	KEGG: hsa04350; PMID:26893264	Secreted Signaling	BMP2 - (BMPR1A+ACVR2A)
BMP2_BMPR1A_ACVR2B	BMP2_BMPR1A_ACVR2B	BMP	BMP2	BMPR1A_ACVR2B		BMP antagonist		BMP inhibition receptor	KEGG: hsa04350; PMID:26893264	Secreted Signaling	BMP2 - (BMPR1A+ACVR2B)
BMP2_BMPR1A_BMPR2	BMP2_BMPR1A_BMPR2	BMP	BMP2	BMPR1A_BMPR2		BMP antagonist		BMP inhibition receptor	KEGG: hsa04350; PMID:26893264	Secreted Signaling	BMP2 - (BMPR1A+BMPR2)
BMP2_BMPR1B_ACVR2A	BMP2_BMPR1B_ACVR2A	BMP	BMP2	BMPR1B_ACVR2A		BMP antagonist		BMP inhibition receptor	KEGG: hsa04350; PMID:26893264	Secreted Signaling	BMP2 - (BMPR1B+ACVR2A)
BMP2_BMPR1B_BMPR2	BMP2_BMPR1B_BMPR2	BMP	BMP2	BMPR1B_BMPR2		BMP antagonist		BMP inhibition receptor	KEGG: hsa04350; PMID:26893264	Secreted Signaling	BMP2 - (BMPR1B+BMPR2)
BMP4_BMPR1A_ACVR2A	BMP4_BMPR1A_ACVR2A	BMP	BMP4	BMPR1A_ACVR2A		BMP antagonist		BMP inhibition receptor	KEGG: hsa04350; PMID:26893264	Secreted Signaling	BMP4 - (BMPR1A+ACVR2A)
BMP4_BMPR1A_ACVR2B	BMP4_BMPR1A_ACVR2B	BMP	BMP4	BMPR1A_ACVR2B		BMP antagonist		BMP inhibition receptor	KEGG: hsa04350; PMID:26893264	Secreted Signaling	BMP4 - (BMPR1A+ACVR2B)
BMP4_BMPR1A_BMPR2	BMP4_BMPR1A_BMPR2	BMP	BMP4	BMPR1A_BMPR2		BMP antagonist		BMP inhibition receptor	KEGG: hsa04350; PMID:26893264	Secreted Signaling	BMP4 - (BMPR1A+BMPR2)
BMP4_BMPR1B_ACVR2A	BMP4_BMPR1B_ACVR2A	BMP	BMP4	BMPR1B_ACVR2A		BMP antagonist		BMP inhibition receptor	KEGG: hsa04350; PMID:26893264	Secreted Signaling	BMP4 - (BMPR1B+ACVR2A)
BMP4_BMPR1B_BMPR2	BMP4_BMPR1B_BMPR2	BMP	BMP4	BMPR1B_BMPR2		BMP antagonist		BMP inhibition receptor	KEGG: hsa04350; PMID:26893264	Secreted Signaling	BMP4 - (BMPR1B+BMPR2)
GDF5_BMPR1A_ACVR2A	GDF5_BMPR1A_ACVR2A	BMP	GDF5	BMPR1A_ACVR2A		BMP antagonist		BMP inhibition receptor	KEGG: hsa04350; PMID:26893264	Secreted Signaling	GDF5 - (BMPR1A+ACVR2A)
GDF5_BMPR1A_ACVR2B	GDF5_BMPR1A_ACVR2B	BMP	GDF5	BMPR1A_ACVR2B		BMP antagonist		BMP inhibition receptor	KEGG: hsa04350; PMID:26893264	Secreted Signaling	GDF5 - (BMPR1A+ACVR2B)
GDF5_BMPR1A_BMPR2	GDF5_BMPR1A_BMPR2	BMP	GDF5	BMPR1A_BMPR2		BMP antagonist		BMP inhibition receptor	KEGG: hsa04350; PMID:26893264	Secreted Signaling	GDF5 - (BMPR1A+BMPR2)
GDF5_BMPR1B_ACVR2A	GDF5_BMPR1B_ACVR2A	BMP	GDF5	BMPR1B_ACVR2A		BMP antagonist		BMP inhibition receptor	KEGG: hsa04350; PMID:26893264	Secreted Signaling	GDF5 - (BMPR1B+ACVR2A)
GDF5_BMPR1B_BMPR2	GDF5_BMPR1B_BMPR2	BMP	GDF5	BMPR1B_BMPR2		BMP antagonist		BMP inhibition receptor	KEGG: hsa04350; PMID:26893264	Secreted Signaling	GDF5 - (BMPR1B+BMPR2)
GDF6_BMPR1A_ACVR2A	GDF6_BMPR1A_ACVR2A	BMP	GDF6	BMPR1A_ACVR2A		BMP antagonist		BMP inhibition receptor	KEGG: hsa04350; PMID:26893264	Secreted Signaling	GDF6 - (BMPR1A+ACVR2A)
GDF6_BMPR1A_ACVR2B	GDF6_BMPR1A_ACVR2B	BMP	GDF6	BMPR1A_ACVR2B		BMP antagonist		BMP inhibition receptor	KEGG: hsa04350; PMID:26893264	Secreted Signaling	GDF6 - (BMPR1A+ACVR2B)
GDF6_BMPR1A_BMPR2	GDF6_BMPR1A_BMPR2	BMP	GDF6	BMPR1A_BMPR2		BMP antagonist		BMP inhibition receptor	KEGG: hsa04350; PMID:26893264	Secreted Signaling	GDF6 - (BMPR1A+BMPR2)
GDF6_BMPR1B_ACVR2A	GDF6_BMPR1B_ACVR2A	BMP	GDF6	BMPR1B_ACVR2A		BMP antagonist		BMP inhibition receptor	KEGG: hsa04350; PMID:26893264	Secreted Signaling	GDF6 - (BMPR1B+ACVR2A)
GDF6_BMPR1B_BMPR2	GDF6_BMPR1B_BMPR2	BMP	GDF6	BMPR1B_BMPR2		BMP antagonist		BMP inhibition receptor	KEGG: hsa04350; PMID:26893264	Secreted Signaling	GDF6 - (BMPR1B+BMPR2)
GDF7_BMPR1A_ACVR2A	GDF7_BMPR1A_ACVR2A	BMP	GDF7	BMPR1A_ACVR2A		BMP antagonist		BMP inhibition receptor	KEGG: hsa04350; PMID:26893264	Secreted Signaling	GDF7 - (BMPR1A+ACVR2A)
GDF7_BMPR1A_ACVR2B	GDF7_BMPR1A_ACVR2B	BMP	GDF7	BMPR1A_ACVR2B		BMP antagonist		BMP inhibition receptor	KEGG: hsa04350; PMID:26893264	Secreted Signaling	GDF7 - (BMPR1A+ACVR2B)
GDF7_BMPR1A_BMPR2	GDF7_BMPR1A_BMPR2	BMP	GDF7	BMPR1A_BMPR2		BMP antagonist		BMP inhibition receptor	KEGG: hsa04350; PMID:26893264	Secreted Signaling	GDF7 - (BMPR1A+BMPR2)
GDF7_BMPR1B_ACVR2A	GDF7_BMPR1B_ACVR2A	BMP	GDF7	BMPR1B_ACVR2A		BMP antagonist		BMP inhibition receptor	KEGG: hsa04350; PMID:26893264	Secreted Signaling	GDF7 - (BMPR1B+ACVR2A)
GDF7_BMPR1B_BMPR2	GDF7_BMPR1B_BMPR2	BMP	GDF7	BMPR1B_BMPR2		BMP antagonist		BMP inhibition receptor	KEGG: hsa04350; PMID:26893264	Secreted Signaling	GDF7 - (BMPR1B+BMPR2)
BMP5_ACVR1_ACVR2A	BMP5_ACVR1_ACVR2A	BMP	BMP5	ACVR1_ACVR2A		BMP antagonist		BMP inhibition receptor	KEGG: hsa04350; PMID:26893264	Secreted Signaling	BMP5 - (ACVR1+ACVR2A)
BMP5_ACVR1_ACVR2B	BMP5_ACVR1_ACVR2B	BMP	BMP5	ACVR1_ACVR2B		BMP antagonist		BMP inhibition receptor	KEGG: hsa04350; PMID:26893264	Secreted Signaling	BMP5 - (ACVR1+ACVR2B)
BMP5_ACVR1_BMPR2	BMP5_ACVR1_BMPR2	BMP	BMP5	ACVR1_BMPR2		BMP antagonist		BMP inhibition receptor	KEGG: hsa04350; PMID:26893264	Secreted Signaling	BMP5 - (ACVR1+BMPR2)
BMP5_BMPR1A_ACVR2A	BMP5_BMPR1A_ACVR2A	BMP	BMP5	BMPR1A_ACVR2A		BMP antagonist		BMP inhibition receptor	KEGG: hsa04350; PMID:26893264	Secreted Signaling	BMP5 - (BMPR1A+ACVR2A)
BMP5_BMPR1A_ACVR2B	BMP5_BMPR1A_ACVR2B	BMP	BMP5	BMPR1A_ACVR2B		BMP antagonist		BMP inhibition receptor	KEGG: hsa04350; PMID:26893264	Secreted Signaling	BMP5 - (BMPR1A+ACVR2B)
BMP5_BMPR1A_BMPR2	BMP5_BMPR1A_BMPR2	BMP	BMP5	BMPR1A_BMPR2		BMP antagonist		BMP inhibition receptor	KEGG: hsa04350; PMID:26893264	Secreted Signaling	BMP5 - (BMPR1A+BMPR2)
BMP5_BMPR1B_ACVR2A	BMP5_BMPR1B_ACVR2A	BMP	BMP5	BMPR1B_ACVR2A		BMP antagonist		BMP inhibition receptor	KEGG: hsa04350; PMID:26893264	Secreted Signaling	BMP5 - (BMPR1B+ACVR2A)
BMP5_BMPR1B_BMPR2	BMP5_BMPR1B_BMPR2	BMP	BMP5	BMPR1B_BMPR2		BMP antagonist		BMP inhibition receptor	KEGG: hsa04350; PMID:26893264	Secreted Signaling	BMP5 - (BMPR1B+BMPR2)
BMP6_ACVR1_ACVR2A	BMP6_ACVR1_ACVR2A	BMP	BMP6	ACVR1_ACVR2A		BMP antagonist		BMP inhibition receptor	KEGG: hsa04350; PMID:26893264	Secreted Signaling	BMP6 - (ACVR1+ACVR2A)
BMP6_ACVR1_ACVR2B	BMP6_ACVR1_ACVR2B	BMP	BMP6	ACVR1_ACVR2B		BMP antagonist		BMP inhibition receptor	KEGG: hsa04350; PMID:26893264	Secreted Signaling	BMP6 - (ACVR1+ACVR2B)
BMP6_ACVR1_BMPR2	BMP6_ACVR1_BMPR2	BMP	BMP6	ACVR1_BMPR2		BMP antagonist		BMP inhibition receptor	KEGG: hsa04350; PMID:26893264	Secreted Signaling	BMP6 - (ACVR1+BMPR2)
BMP6_BMPR1A_ACVR2A	BMP6_BMPR1A_ACVR2A	BMP	BMP6	BMPR1A_ACVR2A		BMP antagonist		BMP inhibition receptor	KEGG: hsa04350; PMID:26893264	Secreted Signaling	BMP6 - (BMPR1A+ACVR2A)
BMP6_BMPR1A_ACVR2B	BMP6_BMPR1A_ACVR2B	BMP	BMP6	BMPR1A_ACVR2B		BMP antagonist		BMP inhibition receptor	KEGG: hsa04350; PMID:26893264	Secreted Signaling	BMP6 - (BMPR1A+ACVR2B)
BMP6_BMPR1A_BMPR2	BMP6_BMPR1A_BMPR2	BMP	BMP6	BMPR1A_BMPR2		BMP antagonist		BMP inhibition receptor	KEGG: hsa04350; PMID:26893264	Secreted Signaling	BMP6 - (BMPR1A+BMPR2)
BMP6_BMPR1B_ACVR2A	BMP6_BMPR1B_ACVR2A	BMP	BMP6	BMPR1B_ACVR2A		BMP antagonist		BMP inhibition receptor	KEGG: hsa04350; PMID:26893264	Secreted Signaling	BMP6 - (BMPR1B+ACVR2A)
BMP6_BMPR1B_BMPR2	BMP6_BMPR1B_BMPR2	BMP	BMP6	BMPR1B_BMPR2		BMP antagonist		BMP inhibition receptor	KEGG: hsa04350; PMID:26893264	Secreted Signaling	BMP6 - (BMPR1B+BMPR2)
BMP7_ACVR1_ACVR2A	BMP7_ACVR1_ACVR2A	BMP	BMP7	ACVR1_ACVR2A		BMP antagonist		BMP inhibition receptor	KEGG: hsa04350; PMID:26893264	Secreted Signaling	BMP7 - (ACVR1+ACVR2A)
BMP7_ACVR1_ACVR2B	BMP7_ACVR1_ACVR2B	BMP	BMP7	ACVR1_ACVR2B		BMP antagonist		BMP inhibition receptor	KEGG: hsa04350; PMID:26893264	Secreted Signaling	BMP7 - (ACVR1+ACVR2B)
BMP7_ACVR1_BMPR2	BMP7_ACVR1_BMPR2	BMP	BMP7	ACVR1_BMPR2		BMP antagonist		BMP inhibition receptor	KEGG: hsa04350; PMID:26893264	Secreted Signaling	BMP7 - (ACVR1+BMPR2)
BMP7_BMPR1A_ACVR2A	BMP7_BMPR1A_ACVR2A	BMP	BMP7	BMPR1A_ACVR2A		BMP antagonist		BMP inhibition receptor	KEGG: hsa04350; PMID:26893264	Secreted Signaling	BMP7 - (BMPR1A+ACVR2A)
BMP7_BMPR1A_ACVR2B	BMP7_BMPR1A_ACVR2B	BMP	BMP7	BMPR1A_ACVR2B		BMP antagonist		BMP inhibition receptor	KEGG: hsa04350; PMID:26893264	Secreted Signaling	BMP7 - (BMPR1A+ACVR2B)
BMP7_BMPR1A_BMPR2	BMP7_BMPR1A_BMPR2	BMP	BMP7	BMPR1A_BMPR2		BMP antagonist		BMP inhibition receptor	KEGG: hsa04350; PMID:26893264	Secreted Signaling	BMP7 - (BMPR1A+BMPR2)
BMP7_BMPR1B_ACVR2A	BMP7_BMPR1B_ACVR2A	BMP	BMP7	BMPR1B_ACVR2A		BMP antagonist		BMP inhibition receptor	KEGG: hsa04350; PMID:26893264	Secreted Signaling	BMP7 - (BMPR1B+ACVR2A)
BMP7_BMPR1B_BMPR2	BMP7_BMPR1B_BMPR2	BMP	BMP7	BMPR1B_BMPR2		BMP antagonist		BMP inhibition receptor	KEGG: hsa04350; PMID:26893264	Secreted Signaling	BMP7 - (BMPR1B+BMPR2)
BMP8B_ACVR1_ACVR2A	BMP8B_ACVR1_ACVR2A	BMP	BMP8B	ACVR1_ACVR2A		BMP antagonist		BMP inhibition receptor	KEGG: hsa04350; PMID:26893264	Secreted Signaling	BMP8B - (ACVR1+ACVR2A)
BMP8B_ACVR1_ACVR2B	BMP8B_ACVR1_ACVR2B	BMP	BMP8B	ACVR1_ACVR2B		BMP antagonist		BMP inhibition receptor	KEGG: hsa04350; PMID:26893264	Secreted Signaling	BMP8B - (ACVR1+ACVR2B)
BMP8B_ACVR1_BMPR2	BMP8B_ACVR1_BMPR2	BMP	BMP8B	ACVR1_BMPR2		BMP antagonist		BMP inhibition receptor	KEGG: hsa04350; PMID:26893264	Secreted Signaling	BMP8B - (ACVR1+BMPR2)
BMP8B_BMPR1A_ACVR2A	BMP8B_BMPR1A_ACVR2A	BMP	BMP8B	BMPR1A_ACVR2A		BMP antagonist		BMP inhibition receptor	KEGG: hsa04350; PMID:26893264	Secreted Signaling	BMP8B - (BMPR1A+ACVR2A)
BMP8B_BMPR1A_ACVR2B	BMP8B_BMPR1A_ACVR2B	BMP	BMP8B	BMPR1A_ACVR2B		BMP antagonist		BMP inhibition receptor	KEGG: hsa04350; PMID:26893264	Secreted Signaling	BMP8B - (BMPR1A+ACVR2B)
BMP8B_BMPR1A_BMPR2	BMP8B_BMPR1A_BMPR2	BMP	BMP8B	BMPR1A_BMPR2		BMP antagonist		BMP inhibition receptor	KEGG: hsa04350; PMID:26893264	Secreted Signaling	BMP8B - (BMPR1A+BMPR2)
BMP8B_BMPR1B_ACVR2A	BMP8B_BMPR1B_ACVR2A	BMP	BMP8B	BMPR1B_ACVR2A		BMP antagonist		BMP inhibition receptor	KEGG: hsa04350; PMID:26893264	Secreted Signaling	BMP8B - (BMPR1B+ACVR2A)
BMP8B_BMPR1B_BMPR2	BMP8B_BMPR1B_BMPR2	BMP	BMP8B	BMPR1B_BMPR2		BMP antagonist		BMP inhibition receptor	KEGG: hsa04350; PMID:26893264	Secreted Signaling	BMP8B - (BMPR1B+BMPR2)
GDF9_ACVR1B_BMPR2	GDF9_ACVR1B_BMPR2	GDF	GDF9	ACVR1B_BMPR2					KEGG: hsa04350	Secreted Signaling	GDF9 - (ACVR1B+BMPR2)
GDF15_TGFBR2	GDF15_TGFBR2	GDF	GDF15	TGFBR2					KEGG: hsa04350	Secreted Signaling	GDF15 - TGFBR2
AMH_AMHR2_ACVR1	AMH_AMHR2_ACVR1	AMH	AMH	AMHR2_ACVR1					KEGG: hsa04060	Secreted Signaling	AMH - (AMHR2+ACVR1)
AMH_AMHR2_BMPR1A	AMH_AMHR2_BMPR1A	AMH	AMH	AMHR2_BMPR1A					KEGG: hsa04060	Secreted Signaling	AMH - (AMHR2+BMPR1A)
GDNF_GFRA1	GDNF_GFRA1	GDNF	GDNF	GFRA1_RET					PMID: 11544105	Secreted Signaling	GDNF - GFRA1
NRTN_GFRA2	NRTN_GFRA2	GDNF	NRTN	GFRA2_RET					PMID: 11544106	Secreted Signaling	NRTN - GFRA2
INHBA_ACVR1B_ACVR2A	INHBA_ACVR1B_ACVR2A	ACTIVIN	INHBA	ACVR1B_ACVR2A		ACTIVIN antagonist		ACTIVIN inhibition receptor	KEGG: hsa04350	Secreted Signaling	INHBA - (ACVR1B+ACVR2A)
INHBB_ACVR1B_ACVR2A	INHBB_ACVR1B_ACVR2A	ACTIVIN	INHBB	ACVR1B_ACVR2A		ACTIVIN antagonist		ACTIVIN inhibition receptor	KEGG: hsa04352	Secreted Signaling	INHBB - (ACVR1B+ACVR2A)
INHBB_ACVR1C_ACVR2A	INHBB_ACVR1C_ACVR2A	ACTIVIN	INHBB	ACVR1C_ACVR2A		ACTIVIN antagonist		ACTIVIN inhibition receptor	KEGG: hsa04354	Secreted Signaling	INHBB - (ACVR1C+ACVR2A)
INHBB_ACVR1C_ACVR2B	INHBB_ACVR1C_ACVR2B	ACTIVIN	INHBB	ACVR1C_ACVR2B		ACTIVIN antagonist		ACTIVIN inhibition receptor	KEGG: hsa04355	Secreted Signaling	INHBB - (ACVR1C+ACVR2B)
INHBABB_ACVR1B_ACVR2A	INHBABB_ACVR1B_ACVR2A	ACTIVIN	Activin AB	ACVR1B_ACVR2A		ACTIVIN antagonist		ACTIVIN inhibition receptor	PMID: 2457849; PMID: 22991378	Secreted Signaling	INHBABB - (ACVR1B+ACVR2A)
INHBABB_ACVR1C_ACVR2A	INHBABB_ACVR1C_ACVR2A	ACTIVIN	Activin AB	ACVR1C_ACVR2A		ACTIVIN antagonist		ACTIVIN inhibition receptor	PMID: 2457849; PMID: 22991378	Secreted Signaling	INHBABB - (ACVR1C+ACVR2A)
INHB_ACVR1C_ACVR2B	INHB_ACVR1C_ACVR2B	ACTIVIN	Activin AB	ACVR1C_ACVR2B		ACTIVIN antagonist		ACTIVIN inhibition receptor	PMID: 2457849; PMID: 22991378	Secreted Signaling	INHB - (ACVR1C+ACVR2B)
INHABA_ACVR2A	INHABA_ACVR2A	ACTIVIN	Inhibin A	ACVR2A		ACTIVIN antagonist		ACTIVIN inhibition receptor	PMID: 15027884	Secreted Signaling	INHABA - ACVR2A
WNT10A_FZD1_LRP5	WNT10A_FZD1_LRP5	WNT	WNT10A	FZD1_LRP5	WNT agonist	WNT antagonist	WNT activation receptor	WNT inhibition receptor	KEGG: hsa04310; PMID: 23209147	Secreted Signaling	WNT10A - (FZD1+LRP5)
WNT10A_FZD2_LRP5	WNT10A_FZD2_LRP5	WNT	WNT10A	FZD2_LRP5	WNT agonist	WNT antagonist	WNT activation receptor	WNT inhibition receptor	KEGG: hsa04310; PMID: 23209147	Secreted Signaling	WNT10A - (FZD2+LRP5)
WNT10A_FZD3_LRP5	WNT10A_FZD3_LRP5	WNT	WNT10A	FZD3_LRP5	WNT agonist	WNT antagonist	WNT activation receptor	WNT inhibition receptor	KEGG: hsa04310; PMID: 23209147	Secreted Signaling	WNT10A - (FZD3+LRP5)
WNT10A_FZD4_LRP5	WNT10A_FZD4_LRP5	WNT	WNT10A	FZD4_LRP5	WNT agonist	WNT antagonist	WNT activation receptor	WNT inhibition receptor	KEGG: hsa04310; PMID: 23209147	Secreted Signaling	WNT10A - (FZD4+LRP5)
WNT10A_FZD5_LRP5	WNT10A_FZD5_LRP5	WNT	WNT10A	FZD5_LRP5	WNT agonist	WNT antagonist	WNT activation receptor	WNT inhibition receptor	KEGG: hsa04310; PMID: 23209147	Secreted Signaling	WNT10A - (FZD5+LRP5)
WNT10A_FZD6_LRP5	WNT10A_FZD6_LRP5	WNT	WNT10A	FZD6_LRP5	WNT agonist	WNT antagonist	WNT activation receptor	WNT inhibition receptor	KEGG: hsa04310; PMID: 23209147	Secreted Signaling	WNT10A - (FZD6+LRP5)
WNT10A_FZD7_LRP5	WNT10A_FZD7_LRP5	WNT	WNT10A	FZD7_LRP5	WNT agonist	WNT antagonist	WNT activation receptor	WNT inhibition receptor	KEGG: hsa04310; PMID: 23209147	Secreted Signaling	WNT10A - (FZD7+LRP5)
WNT10A_FZD8_LRP5	WNT10A_FZD8_LRP5	WNT	WNT10A	FZD8_LRP5	WNT agonist	WNT antagonist	WNT activation receptor	WNT inhibition receptor	KEGG: hsa04310; PMID: 23209147	Secreted Signaling	WNT10A - (FZD8+LRP5)
WNT10A_FZD9_LRP5	WNT10A_FZD9_LRP5	WNT	WNT10A	FZD9_LRP5	WNT agonist	WNT antagonist	WNT activation receptor	WNT inhibition receptor	KEGG: hsa04310; PMID: 23209147	Secreted Signaling	WNT10A - (FZD9+LRP5)
WNT16_FZD1_LRP5	WNT16_FZD1_LRP5	WNT	WNT16	FZD1_LRP5	WNT agonist	WNT antagonist	WNT activation receptor	WNT inhibition receptor	KEGG: hsa04310; PMID: 23209147	Secreted Signaling	WNT16 - (FZD1+LRP5)
WNT16_FZD2_LRP5	WNT16_FZD2_LRP5	WNT	WNT16	FZD2_LRP5	WNT agonist	WNT antagonist	WNT activation receptor	WNT inhibition receptor	KEGG: hsa04310; PMID: 23209147	Secreted Signaling	WNT16 - (FZD2+LRP5)
WNT16_FZD3_LRP5	WNT16_FZD3_LRP5	WNT	WNT16	FZD3_LRP5	WNT agonist	WNT antagonist	WNT activation receptor	WNT inhibition receptor	KEGG: hsa04310; PMID: 23209147	Secreted Signaling	WNT16 - (FZD3+LRP5)
WNT16_FZD4_LRP5	WNT16_FZD4_LRP5	WNT	WNT16	FZD4_LRP5	WNT agonist	WNT antagonist	WNT activation receptor	WNT inhibition receptor	KEGG: hsa04310; PMID: 23209147	Secreted Signaling	WNT16 - (FZD4+LRP5)
WNT16_FZD5_LRP5	WNT16_FZD5_LRP5	WNT	WNT16	FZD5_LRP5	WNT agonist	WNT antagonist	WNT activation receptor	WNT inhibition receptor	KEGG: hsa04310; PMID: 23209147	Secreted Signaling	WNT16 - (FZD5+LRP5)
WNT16_FZD6_LRP5	WNT16_FZD6_LRP5	WNT	WNT16	FZD6_LRP5	WNT agonist	WNT antagonist	WNT activation receptor	WNT inhibition receptor	KEGG: hsa04310; PMID: 23209147	Secreted Signaling	WNT16 - (FZD6+LRP5)
WNT16_FZD7_LRP5	WNT16_FZD7_LRP5	WNT	WNT16	FZD7_LRP5	WNT agonist	WNT antagonist	WNT activation receptor	WNT inhibition receptor	KEGG: hsa04310; PMID: 23209147	Secreted Signaling	WNT16 - (FZD7+LRP5)
WNT16_FZD8_LRP5	WNT16_FZD8_LRP5	WNT	WNT16	FZD8_LRP5	WNT agonist	WNT antagonist	WNT activation receptor	WNT inhibition receptor	KEGG: hsa04310; PMID: 23209147	Secreted Signaling	WNT16 - (FZD8+LRP5)
WNT16_FZD9_LRP5	WNT16_FZD9_LRP5	WNT	WNT16	FZD9_LRP5	WNT agonist	WNT antagonist	WNT activation receptor	WNT inhibition receptor	KEGG: hsa04310; PMID: 23209147	Secreted Signaling	WNT16 - (FZD9+LRP5)
WNT2_FZD1_LRP5	WNT2_FZD1_LRP5	WNT	WNT2	FZD1_LRP5	WNT agonist	WNT antagonist	WNT activation receptor	WNT inhibition receptor	KEGG: hsa04310; PMID: 23209147	Secreted Signaling	WNT2 - (FZD1+LRP5)
WNT2_FZD2_LRP5	WNT2_FZD2_LRP5	WNT	WNT2	FZD2_LRP5	WNT agonist	WNT antagonist	WNT activation receptor	WNT inhibition receptor	KEGG: hsa04310; PMID: 23209147	Secreted Signaling	WNT2 - (FZD2+LRP5)
WNT2_FZD3_LRP5	WNT2_FZD3_LRP5	WNT	WNT2	FZD3_LRP5	WNT agonist	WNT antagonist	WNT activation receptor	WNT inhibition receptor	KEGG: hsa04310; PMID: 23209147	Secreted Signaling	WNT2 - (FZD3+LRP5)
WNT2_FZD4_LRP5	WNT2_FZD4_LRP5	WNT	WNT2	FZD4_LRP5	WNT agonist	WNT antagonist	WNT activation receptor	WNT inhibition receptor	KEGG: hsa04310; PMID: 23209147	Secreted Signaling	WNT2 - (FZD4+LRP5)
WNT2_FZD5_LRP5	WNT2_FZD5_LRP5	WNT	WNT2	FZD5_LRP5	WNT agonist	WNT antagonist	WNT activation receptor	WNT inhibition receptor	KEGG: hsa04310; PMID: 23209147	Secreted Signaling	WNT2 - (FZD5+LRP5)
WNT2_FZD6_LRP5	WNT2_FZD6_LRP5	WNT	WNT2	FZD6_LRP5	WNT agonist	WNT antagonist	WNT activation receptor	WNT inhibition receptor	KEGG: hsa04310; PMID: 23209147	Secreted Signaling	WNT2 - (FZD6+LRP5)
WNT2_FZD7_LRP5	WNT2_FZD7_LRP5	WNT	WNT2	FZD7_LRP5	WNT agonist	WNT antagonist	WNT activation receptor	WNT inhibition receptor	KEGG: hsa04310; PMID: 23209147	Secreted Signaling	WNT2 - (FZD7+LRP5)
WNT2_FZD8_LRP5	WNT2_FZD8_LRP5	WNT	WNT2	FZD8_LRP5	WNT agonist	WNT antagonist	WNT activation receptor	WNT inhibition receptor	KEGG: hsa04310; PMID: 23209147	Secreted Signaling	WNT2 - (FZD8+LRP5)
WNT2_FZD9_LRP5	WNT2_FZD9_LRP5	WNT	WNT2	FZD9_LRP5	WNT agonist	WNT antagonist	WNT activation receptor	WNT inhibition receptor	KEGG: hsa04310; PMID: 23209147	Secreted Signaling	WNT2 - (FZD9+LRP5)
WNT2B_FZD1_LRP5	WNT2B_FZD1_LRP5	WNT	WNT2B	FZD1_LRP5	WNT agonist	WNT antagonist	WNT activation receptor	WNT inhibition receptor	KEGG: hsa04310; PMID: 23209147	Secreted Signaling	WNT2B - (FZD1+LRP5)
WNT2B_FZD2_LRP5	WNT2B_FZD2_LRP5	WNT	WNT2B	FZD2_LRP5	WNT agonist	WNT antagonist	WNT activation receptor	WNT inhibition receptor	KEGG: hsa04310; PMID: 23209147	Secreted Signaling	WNT2B - (FZD2+LRP5)
WNT2B_FZD3_LRP5	WNT2B_FZD3_LRP5	WNT	WNT2B	FZD3_LRP5	WNT agonist	WNT antagonist	WNT activation receptor	WNT inhibition receptor	KEGG: hsa04310; PMID: 23209147	Secreted Signaling	WNT2B - (FZD3+LRP5)
WNT2B_FZD4_LRP5	WNT2B_FZD4_LRP5	WNT	WNT2B	FZD4_LRP5	WNT agonist	WNT antagonist	WNT activation receptor	WNT inhibition receptor	KEGG: hsa04310; PMID: 23209147	Secreted Signaling	WNT2B - (FZD4+LRP5)
WNT2B_FZD5_LRP5	WNT2B_FZD5_LRP5	WNT	WNT2B	FZD5_LRP5	WNT agonist	WNT antagonist	WNT activation receptor	WNT inhibition receptor	KEGG: hsa04310; PMID: 23209147	Secreted Signaling	WNT2B - (FZD5+LRP5)
WNT2B_FZD6_LRP5	WNT2B_FZD6_LRP5	WNT	WNT2B	FZD6_LRP5	WNT agonist	WNT antagonist	WNT activation receptor	WNT inhibition receptor	KEGG: hsa04310; PMID: 23209147	Secreted Signaling	WNT2B - (FZD6+LRP5)
WNT2B_FZD7_LRP5	WNT2B_FZD7_LRP5	WNT	WNT2B	FZD7_LRP5	WNT agonist	WNT antagonist	WNT activation receptor	WNT inhibition receptor	KEGG: hsa04310; PMID: 23209147	Secreted Signaling	WNT2B - (FZD7+LRP5)
WNT2B_FZD8_LRP5	WNT2B_FZD8_LRP5	WNT	WNT2B	FZD8_LRP5	WNT agonist	WNT antagonist	WNT activation receptor	WNT inhibition receptor	KEGG: hsa04310; PMID: 23209147	Secreted Signaling	WNT2B - (FZD8+LRP5)
WNT2B_FZD9_LRP5	WNT2B_FZD9_LRP5	WNT	WNT2B	FZD9_LRP5	WNT agonist	WNT antagonist	WNT activation receptor	WNT inhibition receptor	KEGG: hsa04310; PMID: 23209147	Secreted Signaling	WNT2B - (FZD9+LRP5)
WNT7B_FZD1_LRP5	WNT7B_FZD1_LRP5	WNT	WNT7B	FZD1_LRP5	WNT agonist	WNT antagonist	WNT activation receptor	WNT inhibition receptor	KEGG: hsa04310; PMID: 23209147	Secreted Signaling	WNT7B - (FZD1+LRP5)
WNT7B_FZD2_LRP5	WNT7B_FZD2_LRP5	WNT	WNT7B	FZD2_LRP5	WNT agonist	WNT antagonist	WNT activation receptor	WNT inhibition receptor	KEGG: hsa04310; PMID: 23209147	Secreted Signaling	WNT7B - (FZD2+LRP5)
WNT7B_FZD3_LRP5	WNT7B_FZD3_LRP5	WNT	WNT7B	FZD3_LRP5	WNT agonist	WNT antagonist	WNT activation receptor	WNT inhibition receptor	KEGG: hsa04310; PMID: 23209147	Secreted Signaling	WNT7B - (FZD3+LRP5)
WNT7B_FZD4_LRP5	WNT7B_FZD4_LRP5	WNT	WNT7B	FZD4_LRP5	WNT agonist	WNT antagonist	WNT activation receptor	WNT inhibition receptor	KEGG: hsa04310; PMID: 23209147	Secreted Signaling	WNT7B - (FZD4+LRP5)
WNT7B_FZD5_LRP5	WNT7B_FZD5_LRP5	WNT	WNT7B	FZD5_LRP5	WNT agonist	WNT antagonist	WNT activation receptor	WNT inhibition receptor	KEGG: hsa04310; PMID: 23209147	Secreted Signaling	WNT7B - (FZD5+LRP5)
WNT7B_FZD6_LRP5	WNT7B_FZD6_LRP5	WNT	WNT7B	FZD6_LRP5	WNT agonist	WNT antagonist	WNT activation receptor	WNT inhibition receptor	KEGG: hsa04310; PMID: 23209147	Secreted Signaling	WNT7B - (FZD6+LRP5)
WNT7B_FZD7_LRP5	WNT7B_FZD7_LRP5	WNT	WNT7B	FZD7_LRP5	WNT agonist	WNT antagonist	WNT activation receptor	WNT inhibition receptor	KEGG: hsa04310; PMID: 23209147	Secreted Signaling	WNT7B - (FZD7+LRP5)
WNT7B_FZD8_LRP5	WNT7B_FZD8_LRP5	WNT	WNT7B	FZD8_LRP5	WNT agonist	WNT antagonist	WNT activation receptor	WNT inhibition receptor	KEGG: hsa04310; PMID: 23209147	Secreted Signaling	WNT7B - (FZD8+LRP5)
WNT7B_FZD9_LRP5	WNT7B_FZD9_LRP5	WNT	WNT7B	FZD9_LRP5	WNT agonist	WNT antagonist	WNT activation receptor	WNT inhibition receptor	KEGG: hsa04310; PMID: 23209147	Secreted Signaling	WNT7B - (FZD9+LRP5)
WNT10A_FZD2_LRP6	WNT10A_FZD2_LRP6	WNT	WNT10A	FZD2_LRP6	WNT agonist	WNT antagonist	WNT activation receptor	WNT inhibition receptor	KEGG: hsa04310; PMID: 23209147	Secreted Signaling	WNT10A - (FZD2+LRP6)
WNT10A_FZD3_LRP6	WNT10A_FZD3_LRP6	WNT	WNT10A	FZD3_LRP6	WNT agonist	WNT antagonist	WNT activation receptor	WNT inhibition receptor	KEGG: hsa04310; PMID: 23209147	Secreted Signaling	WNT10A - (FZD3+LRP6)
WNT10A_FZD4_LRP6	WNT10A_FZD4_LRP6	WNT	WNT10A	FZD4_LRP6	WNT agonist	WNT antagonist	WNT activation receptor	WNT inhibition receptor	KEGG: hsa04310; PMID: 23209147	Secreted Signaling	WNT10A - (FZD4+LRP6)
WNT10A_FZD6_LRP6	WNT10A_FZD6_LRP6	WNT	WNT10A	FZD6_LRP6	WNT agonist	WNT antagonist	WNT activation receptor	WNT inhibition receptor	KEGG: hsa04310; PMID: 23209147	Secreted Signaling	WNT10A - (FZD6+LRP6)
WNT10A_FZD7_LRP6	WNT10A_FZD7_LRP6	WNT	WNT10A	FZD7_LRP6	WNT agonist	WNT antagonist	WNT activation receptor	WNT inhibition receptor	KEGG: hsa04310; PMID: 23209147	Secreted Signaling	WNT10A - (FZD7+LRP6)
WNT10A_FZD8_LRP6	WNT10A_FZD8_LRP6	WNT	WNT10A	FZD8_LRP6	WNT agonist	WNT antagonist	WNT activation receptor	WNT inhibition receptor	KEGG: hsa04310; PMID: 23209147	Secreted Signaling	WNT10A - (FZD8+LRP6)
WNT16_FZD2_LRP6	WNT16_FZD2_LRP6	WNT	WNT16	FZD2_LRP6	WNT agonist	WNT antagonist	WNT activation receptor	WNT inhibition receptor	KEGG: hsa04310; PMID: 23209147	Secreted Signaling	WNT16 - (FZD2+LRP6)
WNT16_FZD3_LRP6	WNT16_FZD3_LRP6	WNT	WNT16	FZD3_LRP6	WNT agonist	WNT antagonist	WNT activation receptor	WNT inhibition receptor	KEGG: hsa04310; PMID: 23209147	Secreted Signaling	WNT16 - (FZD3+LRP6)
WNT16_FZD4_LRP6	WNT16_FZD4_LRP6	WNT	WNT16	FZD4_LRP6	WNT agonist	WNT antagonist	WNT activation receptor	WNT inhibition receptor	KEGG: hsa04310; PMID: 23209147	Secreted Signaling	WNT16 - (FZD4+LRP6)
WNT16_FZD6_LRP6	WNT16_FZD6_LRP6	WNT	WNT16	FZD6_LRP6	WNT agonist	WNT antagonist	WNT activation receptor	WNT inhibition receptor	KEGG: hsa04310; PMID: 23209147	Secreted Signaling	WNT16 - (FZD6+LRP6)
WNT16_FZD7_LRP6	WNT16_FZD7_LRP6	WNT	WNT16	FZD7_LRP6	WNT agonist	WNT antagonist	WNT activation receptor	WNT inhibition receptor	KEGG: hsa04310; PMID: 23209147	Secreted Signaling	WNT16 - (FZD7+LRP6)
WNT16_FZD8_LRP6	WNT16_FZD8_LRP6	WNT	WNT16	FZD8_LRP6	WNT agonist	WNT antagonist	WNT activation receptor	WNT inhibition receptor	KEGG: hsa04310; PMID: 23209147	Secreted Signaling	WNT16 - (FZD8+LRP6)
WNT2_FZD2_LRP6	WNT2_FZD2_LRP6	WNT	WNT2	FZD2_LRP6	WNT agonist	WNT antagonist	WNT activation receptor	WNT inhibition receptor	KEGG: hsa04310; PMID: 23209147	Secreted Signaling	WNT2 - (FZD2+LRP6)
WNT2_FZD3_LRP6	WNT2_FZD3_LRP6	WNT	WNT2	FZD3_LRP6	WNT agonist	WNT antagonist	WNT activation receptor	WNT inhibition receptor	KEGG: hsa04310; PMID: 23209147	Secreted Signaling	WNT2 - (FZD3+LRP6)
WNT2_FZD4_LRP6	WNT2_FZD4_LRP6	WNT	WNT2	FZD4_LRP6	WNT agonist	WNT antagonist	WNT activation receptor	WNT inhibition receptor	KEGG: hsa04310; PMID: 23209147	Secreted Signaling	WNT2 - (FZD4+LRP6)
WNT2_FZD6_LRP6	WNT2_FZD6_LRP6	WNT	WNT2	FZD6_LRP6	WNT agonist	WNT antagonist	WNT activation receptor	WNT inhibition receptor	KEGG: hsa04310; PMID: 23209147	Secreted Signaling	WNT2 - (FZD6+LRP6)
WNT2_FZD7_LRP6	WNT2_FZD7_LRP6	WNT	WNT2	FZD7_LRP6	WNT agonist	WNT antagonist	WNT activation receptor	WNT inhibition receptor	KEGG: hsa04310; PMID: 23209147	Secreted Signaling	WNT2 - (FZD7+LRP6)
WNT2_FZD8_LRP6	WNT2_FZD8_LRP6	WNT	WNT2	FZD8_LRP6	WNT agonist	WNT antagonist	WNT activation receptor	WNT inhibition receptor	KEGG: hsa04310; PMID: 23209147	Secreted Signaling	WNT2 - (FZD8+LRP6)
WNT2B_FZD2_LRP6	WNT2B_FZD2_LRP6	WNT	WNT2B	FZD2_LRP6	WNT agonist	WNT antagonist	WNT activation receptor	WNT inhibition receptor	KEGG: hsa04310; PMID: 23209147	Secreted Signaling	WNT2B - (FZD2+LRP6)
WNT2B_FZD3_LRP6	WNT2B_FZD3_LRP6	WNT	WNT2B	FZD3_LRP6	WNT agonist	WNT antagonist	WNT activation receptor	WNT inhibition receptor	KEGG: hsa04310; PMID: 23209147	Secreted Signaling	WNT2B - (FZD3+LRP6)
WNT2B_FZD4_LRP6	WNT2B_FZD4_LRP6	WNT	WNT2B	FZD4_LRP6	WNT agonist	WNT antagonist	WNT activation receptor	WNT inhibition receptor	KEGG: hsa04310; PMID: 23209147	Secreted Signaling	WNT2B - (FZD4+LRP6)
WNT2B_FZD6_LRP6	WNT2B_FZD6_LRP6	WNT	WNT2B	FZD6_LRP6	WNT agonist	WNT antagonist	WNT activation receptor	WNT inhibition receptor	KEGG: hsa04310; PMID: 23209147	Secreted Signaling	WNT2B - (FZD6+LRP6)
WNT2B_FZD7_LRP6	WNT2B_FZD7_LRP6	WNT	WNT2B	FZD7_LRP6	WNT agonist	WNT antagonist	WNT activation receptor	WNT inhibition receptor	KEGG: hsa04310; PMID: 23209147	Secreted Signaling	WNT2B - (FZD7+LRP6)
WNT2B_FZD8_LRP6	WNT2B_FZD8_LRP6	WNT	WNT2B	FZD8_LRP6	WNT agonist	WNT antagonist	WNT activation receptor	WNT inhibition receptor	KEGG: hsa04310; PMID: 23209147	Secreted Signaling	WNT2B - (FZD8+LRP6)
WNT7B_FZD2_LRP6	WNT7B_FZD2_LRP6	WNT	WNT7B	FZD2_LRP6	WNT agonist	WNT antagonist	WNT activation receptor	WNT inhibition receptor	KEGG: hsa04310; PMID: 23209147	Secreted Signaling	WNT7B - (FZD2+LRP6)
WNT7B_FZD3_LRP6	WNT7B_FZD3_LRP6	WNT	WNT7B	FZD3_LRP6	WNT agonist	WNT antagonist	WNT activation receptor	WNT inhibition receptor	KEGG: hsa04310; PMID: 23209147	Secreted Signaling	WNT7B - (FZD3+LRP6)
WNT7B_FZD4_LRP6	WNT7B_FZD4_LRP6	WNT	WNT7B	FZD4_LRP6	WNT agonist	WNT antagonist	WNT activation receptor	WNT inhibition receptor	KEGG: hsa04310; PMID: 23209147	Secreted Signaling	WNT7B - (FZD4+LRP6)
WNT7B_FZD6_LRP6	WNT7B_FZD6_LRP6	WNT	WNT7B	FZD6_LRP6	WNT agonist	WNT antagonist	WNT activation receptor	WNT inhibition receptor	KEGG: hsa04310; PMID: 23209147	Secreted Signaling	WNT7B - (FZD6+LRP6)
WNT7B_FZD7_LRP6	WNT7B_FZD7_LRP6	WNT	WNT7B	FZD7_LRP6	WNT agonist	WNT antagonist	WNT activation receptor	WNT inhibition receptor	KEGG: hsa04310; PMID: 23209147	Secreted Signaling	WNT7B - (FZD7+LRP6)
WNT7B_FZD8_LRP6	WNT7B_FZD8_LRP6	WNT	WNT7B	FZD8_LRP6	WNT agonist	WNT antagonist	WNT activation receptor	WNT inhibition receptor	KEGG: hsa04310; PMID: 23209147	Secreted Signaling	WNT7B - (FZD8+LRP6)
WNT5A_FZD2	WNT5A_FZD2	ncWNT	WNT5A	FZD2			ncWNT activation receptor		KEGG: hsa04310	Secreted Signaling	WNT5A - FZD2
WNT5A_FZD3	WNT5A_FZD3	ncWNT	WNT5A	FZD3			ncWNT activation receptor		KEGG: hsa04310	Secreted Signaling	WNT5A - FZD3
WNT5A_FZD4	WNT5A_FZD4	ncWNT	WNT5A	FZD4			ncWNT activation receptor		KEGG: hsa04310	Secreted Signaling	WNT5A - FZD4
WNT5A_FZD6	WNT5A_FZD6	ncWNT	WNT5A	FZD6			ncWNT activation receptor		KEGG: hsa04310	Secreted Signaling	WNT5A - FZD6
WNT5A_FZD7	WNT5A_FZD7	ncWNT	WNT5A	FZD7			ncWNT activation receptor		KEGG: hsa04310	Secreted Signaling	WNT5A - FZD7
WNT5A_FZD8	WNT5A_FZD8	ncWNT	WNT5A	FZD8			ncWNT activation receptor		KEGG: hsa04310	Secreted Signaling	WNT5A - FZD8
WNT5A_MCAM	WNT5A_MCAM	ncWNT	WNT5A	MCAM					PMID: 24335906	Secreted Signaling	WNT5A - MCAM
WNT5B_FZD2	WNT5B_FZD2	ncWNT	WNT5B	FZD2			ncWNT activation receptor		KEGG: hsa04310	Secreted Signaling	WNT5B - FZD2
WNT5B_FZD3	WNT5B_FZD3	ncWNT	WNT5B	FZD3			ncWNT activation receptor		KEGG: hsa04310	Secreted Signaling	WNT5B - FZD3
WNT5B_FZD4	WNT5B_FZD4	ncWNT	WNT5B	FZD4			ncWNT activation receptor		KEGG: hsa04310	Secreted Signaling	WNT5B - FZD4
WNT5B_FZD6	WNT5B_FZD6	ncWNT	WNT5B	FZD6			ncWNT activation receptor		KEGG: hsa04310	Secreted Signaling	WNT5B - FZD6
WNT5B_FZD7	WNT5B_FZD7	ncWNT	WNT5B	FZD7			ncWNT activation receptor		KEGG: hsa04310	Secreted Signaling	WNT5B - FZD7
WNT5B_FZD8	WNT5B_FZD8	ncWNT	WNT5B	FZD8			ncWNT activation receptor		KEGG: hsa04310	Secreted Signaling	WNT5B - FZD8
WNT11_FZD2	WNT11_FZD2	ncWNT	WNT11	FZD2			ncWNT activation receptor		KEGG: hsa04310	Secreted Signaling	WNT11 - FZD2
WNT11_FZD3	WNT11_FZD3	ncWNT	WNT11	FZD3			ncWNT activation receptor		KEGG: hsa04310	Secreted Signaling	WNT11 - FZD3
WNT11_FZD4	WNT11_FZD4	ncWNT	WNT11	FZD4			ncWNT activation receptor		KEGG: hsa04310	Secreted Signaling	WNT11 - FZD4
WNT11_FZD6	WNT11_FZD6	ncWNT	WNT11	FZD6			ncWNT activation receptor		KEGG: hsa04310	Secreted Signaling	WNT11 - FZD6
WNT11_FZD7	WNT11_FZD7	ncWNT	WNT11	FZD7			ncWNT activation receptor		KEGG: hsa04310	Secreted Signaling	WNT11 - FZD7
WNT11_FZD8	WNT11_FZD8	ncWNT	WNT11	FZD8			ncWNT activation receptor		KEGG: hsa04310	Secreted Signaling	WNT11 - FZD8
EGF_EGFR	EGF_EGFR	EGF	EGF	EGFR					KEGG: hsa04012	Secreted Signaling	EGF - EGFR
EGF_EGFR_ERBB2	EGF_EGFR_ERBB2	EGF	EGF	EGFR_ERBB2					KEGG: hsa04012	Secreted Signaling	EGF - (EGFR+ERBB2)
TGFA_EGFR	TGFA_EGFR	EGF	TGFA	EGFR					KEGG: hsa04012	Secreted Signaling	TGFA - EGFR
TGFA_EGFR_ERBB2	TGFA_EGFR_ERBB2	EGF	TGFA	EGFR_ERBB2					KEGG: hsa04012	Secreted Signaling	TGFA - (EGFR+ERBB2)
AREG_EGFR	AREG_EGFR	EGF	AREG	EGFR					KEGG: hsa04012	Secreted Signaling	AREG - EGFR
AREG_EGFR_ERBB2	AREG_EGFR_ERBB2	EGF	AREG	EGFR_ERBB2					KEGG: hsa04012	Secreted Signaling	AREG - (EGFR+ERBB2)
BTC_EGFR	BTC_EGFR	EGF	BTC	EGFR					KEGG: hsa04012	Secreted Signaling	BTC - EGFR
BTC_EGFR_ERBB2	BTC_EGFR_ERBB2	EGF	BTC	EGFR_ERBB2					KEGG: hsa04012	Secreted Signaling	BTC - (EGFR+ERBB2)
BTC_ERBB2_ERBB4	BTC_ERBB2_ERBB4	EGF	BTC	ERBB2_ERBB4					KEGG: hsa04012	Secreted Signaling	BTC - (ERBB2+ERBB4)
HBEGF_EGFR	HBEGF_EGFR	EGF	HBEGF	EGFR					KEGG: hsa04012	Secreted Signaling	HBEGF - EGFR
HBEGF_EGFR_ERBB2	HBEGF_EGFR_ERBB2	EGF	HBEGF	EGFR_ERBB2					KEGG: hsa04012	Secreted Signaling	HBEGF - (EGFR+ERBB2)
HBEGF_ERBB2_ERBB4	HBEGF_ERBB2_ERBB4	EGF	HBEGF	ERBB2_ERBB4					KEGG: hsa04012	Secreted Signaling	HBEGF - (ERBB2+ERBB4)
EREG_EGFR	EREG_EGFR	EGF	EREG	EGFR					KEGG: hsa04012	Secreted Signaling	EREG - EGFR
EREG_EGFR_ERBB2	EREG_EGFR_ERBB2	EGF	EREG	EGFR_ERBB2					KEGG: hsa04012	Secreted Signaling	EREG - (EGFR+ERBB2)
EREG_ERBB2_ERBB4	EREG_ERBB2_ERBB4	EGF	EREG	ERBB2_ERBB4					KEGG: hsa04012	Secreted Signaling	EREG - (ERBB2+ERBB4)
NRG1_ERBB2_ERBB3	NRG1_ERBB2_ERBB3	NRG	NRG1	ERBB2_ERBB3					KEGG: hsa04012	Secreted Signaling	NRG1 - (ERBB2+ERBB3)
NRG1_ERBB2_ERBB4	NRG1_ERBB2_ERBB4	NRG	NRG1	ERBB2_ERBB4					KEGG: hsa04012	Secreted Signaling	NRG1 - (ERBB2+ERBB4)
NRG2_ERBB2_ERBB3	NRG2_ERBB2_ERBB3	NRG	NRG2	ERBB2_ERBB3					KEGG: hsa04012	Secreted Signaling	NRG2 - (ERBB2+ERBB3)
NRG2_ERBB2_ERBB4	NRG2_ERBB2_ERBB4	NRG	NRG2	ERBB2_ERBB4					KEGG: hsa04012	Secreted Signaling	NRG2 - (ERBB2+ERBB4)
NRG4_ERBB2_ERBB4	NRG4_ERBB2_ERBB4	NRG	NRG4	ERBB2_ERBB4					KEGG: hsa04012	Secreted Signaling	NRG4 - (ERBB2+ERBB4)
NRG1_ITGAV_ITGB3	NRG1_ITGAV_ITGB3	NRG	NRG1	ITGAV_ITGB3					PMID: 20682778	Secreted Signaling	NRG1 - (ITGAV+ITGB3)
FGF1_FGFR1	FGF1_FGFR1	FGF	FGF1	FGFR1				FGF inhibition receptor	PMC: 4393358	Secreted Signaling	FGF1 - FGFR1
FGF2_FGFR1	FGF2_FGFR1	FGF	FGF2	FGFR1				FGF inhibition receptor	PMC: 4393358	Secreted Signaling	FGF2 - FGFR1
FGF5_FGFR1	FGF5_FGFR1	FGF	FGF5	FGFR1				FGF inhibition receptor	PMC: 4393358	Secreted Signaling	FGF5 - FGFR1
FGF7_FGFR1	FGF7_FGFR1	FGF	FGF7	FGFR1				FGF inhibition receptor	PMC: 4393358	Secreted Signaling	FGF7 - FGFR1
FGF10_FGFR1	FGF10_FGFR1	FGF	FGF10	FGFR1				FGF inhibition receptor	PMC: 4393358	Secreted Signaling	FGF10 - FGFR1
FGF8_FGFR1	FGF8_FGFR1	FGF	FGF8	FGFR1				FGF inhibition receptor	PMC: 4393358	Secreted Signaling	FGF8 - FGFR1
FGF18_FGFR1	FGF18_FGFR1	FGF	FGF18	FGFR1				FGF inhibition receptor	PMC: 4393358	Secreted Signaling	FGF18 - FGFR1
FGF16_FGFR1	FGF16_FGFR1	FGF	FGF16	FGFR1				FGF inhibition receptor	PMC: 4393358	Secreted Signaling	FGF16 - FGFR1
PDGFA_PDGFRA	PDGFA_PDGFRA	PDGF	PDGFA	PDGFRA		PDGF antagonist			PMID: 15207812	Secreted Signaling	PDGFA - PDGFRA
PDGFA_PDGFRB	PDGFA_PDGFRB	PDGF	PDGFA	PDGFRB		PDGF antagonist			PMID: 15207812	Secreted Signaling	PDGFA - PDGFRB
PDGFC_PDGFRA	PDGFC_PDGFRA	PDGF	PDGFC	PDGFRA		PDGF antagonist			PMID: 15207812	Secreted Signaling	PDGFC - PDGFRA
PDGFD_PDGFRB	PDGFD_PDGFRB	PDGF	PDGFD	PDGFRB		PDGF antagonist			PMID: 15207812	Secreted Signaling	PDGFD - PDGFRB
VEGFA_VEGFR2	VEGFA_VEGFR2	VEGF	VEGFA	KDR			VEGF activation receptor		KEGG: hsa04370; PMID: 16633338	Secreted Signaling	VEGFA - VEGFR2
VEGFC_VEGFR3	VEGFC_VEGFR3	VEGF	VEGFC	FLT4					KEGG: hsa04370; PMID: 16633338	Secreted Signaling	VEGFC - VEGFR3
VEGFC_VEGFR2	VEGFC_VEGFR2	VEGF	VEGFC	KDR			VEGF activation receptor		KEGG: hsa04370; PMID: 16633338	Secreted Signaling	VEGFC - VEGFR2
VEGFA_VEGFR1R2	VEGFA_VEGFR1R2	VEGF	VEGFA	FLT1_KDR			VEGF activation receptor		PMID: 16633338	Secreted Signaling	VEGFA - VEGFR1R2
VEGFC_VEGFR2R3	VEGFC_VEGFR2R3	VEGF	VEGFC	FLT4_KDR			VEGF activation receptor		PMID: 16633338	Secreted Signaling	VEGFC - VEGFR2R3
IGF1_IGF1R	IGF1_IGF1R	IGF	IGF1	IGF1R		IGF antagonist			PMID: 14604834	Secreted Signaling	IGF1 - IGF1R
IGF1_ITGAV_ITGB3	IGF1_ITGAV_ITGB3	IGF	IGF1	ITGAV_ITGB3		IGF antagonist			PMID: 28190785; PMID: 28873464	Secreted Signaling	IGF1 - (ITGAV+ITGB3)
IGF1_ITGA6_ITGB4	IGF1_ITGA6_ITGB4	IGF	IGF1	ITGA6_ITGB4		IGF antagonist			PMID: 28190785; PMID: 28873464	Secreted Signaling	IGF1 - (ITGA6+ITGB4)
SHH_PTCH1	SHH_PTCH1	HH	SHH	PTCH1_SMO			HH activation receptor	HH inhibition receptor	KEGG: hsa04340; PMID: 25701396	Secreted Signaling	SHH - PTCH1
SHH_PTCH2	SHH_PTCH2	HH	SHH	PTCH2_SMO			HH activation receptor	HH inhibition receptor	KEGG: hsa04340; PMID: 25701396	Secreted Signaling	SHH - PTCH2
CCL5_CCR1	CCL5_CCR1	CCL	CCL5	CCR1					KEGG: hsa04060	Secreted Signaling	CCL5 - CCR1
CCL3_CCR1	CCL3_CCR1	CCL	CCL3	CCR1					KEGG: hsa04060	Secreted Signaling	CCL3 - CCR1
CCL3L1_CCR1	CCL3L1_CCR1	CCL	CCL3L1	CCR1					KEGG: hsa04060	Secreted Signaling	CCL3L1 - CCR1
CCL8_CCR1	CCL8_CCR1	CCL	CCL8	CCR1					KEGG: hsa04060	Secreted Signaling	CCL8 - CCR1
CCL7_CCR1	CCL7_CCR1	CCL	CCL7	CCR1					KEGG: hsa04060	Secreted Signaling	CCL7 - CCR1
CCL8_ACKR4	CCL8_ACKR4	CCL	CCL8	ACKR4					PMID: 26740381	Secreted Signaling	CCL8 - ACKR4
CXCL11_ACKR3	CXCL11_ACKR3	CXCL	CXCL11	ACKR3					KEGG: hsa04060	Secreted Signaling	CXCL11 - ACKR3
CXCL12_ACKR3	CXCL12_ACKR3	CXCL	CXCL12	ACKR3					KEGG: hsa04060	Secreted Signaling	CXCL12 - ACKR3
MIF_CD74_CXCR4	MIF_CD74_CXCR4	MIF	MIF	CD74_CXCR4					PMID: 29637711; PMID: 24760155	Secreted Signaling	MIF - (CD74+CXCR4)
MIF_CD74_CD44	MIF_CD74_CD44	MIF	MIF	CD74_CD44					PMID: 29637711; PMID: 26175090	Secreted Signaling	MIF - (CD74+CD44)
MIF_CD74_CXCR2	MIF_CD74_CXCR2	MIF	MIF	CD74_CXCR2					PMID: 29637711; PMID: 26175090	Secreted Signaling	MIF - (CD74+CXCR2)
MIF_ACKR3	MIF_ACKR3	MIF	MIF	ACKR3					PMID: 26175090	Secreted Signaling	MIF - ACKR3
IL7_IL7R_IL2RG	IL7_IL7R_IL2RG	IL2	IL7	IL7R_IL2RG					KEGG: hsa04060	Secreted Signaling	IL7 - (IL7R+IL2RG)
IL15_IL15RA_IL2RB	IL15_IL15RA_IL2RB	IL2	IL15	IL15RA_IL2RB					KEGG: hsa04060	Secreted Signaling	IL15 - (IL15RA+IL2RB)
TSLP_IL7R_CRLF2	TSLP_IL7R_CRLF2	IL2	TSLP	IL7R_CRLF2					KEGG: hsa04060	Secreted Signaling	TSLP - (IL7R+CRLF2)
IL6_IL6R_IL6ST	IL6_IL6R_IL6ST	IL6	IL6	IL6R_IL6ST					KEGG: hsa04060	Secreted Signaling	IL6 - (IL6R+IL6ST)
IL11_IL11RA_IL6ST	IL11_IL11RA_IL6ST	IL6	IL11	IL11R complex					KEGG: hsa04060	Secreted Signaling	IL11 - (IL11RA+IL6ST)
CNTF_CNTFR_LIFR	CNTF_CNTFR_LIFR	LIFR	CNTF	CNTFR_LIFR					KEGG: hsa04060	Secreted Signaling	CNTF - (CNTFR+LIFR)
CLCF1_CNTFR_LIFR	CLCF1_CNTFR_LIFR	LIFR	CLCF1	CNTFR_LIFR					KEGG: hsa04060	Secreted Signaling	CLCF1 - (CNTFR+LIFR)
CTF1_LIFR_IL6ST	CTF1_LIFR_IL6ST	LIFR	CTF1	LIFR_IL6ST					KEGG: hsa04060	Secreted Signaling	CTF1 - (LIFR+IL6ST)
LIF_LIFR_IL6ST	LIF_LIFR_IL6ST	LIFR	LIF	LIFR_IL6ST					KEGG: hsa04060	Secreted Signaling	LIF - (LIFR+IL6ST)
IL19_IL20RA_IL20RB	IL19_IL20RA_IL20RB	IL10	IL19	IL20RA_IL20RB					KEGG: hsa04060	Secreted Signaling	IL19 - (IL20RA+IL20RB)
IL20_IL20RA_IL20RB	IL20_IL20RA_IL20RB	IL10	IL20	IL20RA_IL20RB					KEGG: hsa04060	Secreted Signaling	IL20 - (IL20RA+IL20RB)
IL24_IL20RA_IL20RB	IL24_IL20RA_IL20RB	IL10	IL24	IL20RA_IL20RB					KEGG: hsa04060	Secreted Signaling	IL24 - (IL20RA+IL20RB)
IL20_IL22RA1_IL20RB	IL20_IL22RA1_IL20RB	IL10	IL20	IL22RA1_IL20RB					KEGG: hsa04060	Secreted Signaling	IL20 - (IL22RA1+IL20RB)
IL24_IL22RA1_IL20RB	IL24_IL22RA1_IL20RB	IL10	IL24	IL22RA1_IL20RB					KEGG: hsa04060	Secreted Signaling	IL24 - (IL22RA1+IL20RB)
IL26_IL20RA_IL10RB	IL26_IL20RA_IL10RB	IL10	IL26	IL20RA_IL10RB					KEGG: hsa04060	Secreted Signaling	IL26 - (IL20RA+IL10RB)
IL1A_IL1R1_IL1RAP	IL1A_IL1R1_IL1RAP	IL1	IL1A	IL1R1_IL1RAP		IL antagonist			KEGG: hsa04060	Secreted Signaling	IL1A - (IL1R1+IL1RAP)
IL1B_IL1R1_IL1RAP	IL1B_IL1R1_IL1RAP	IL1	IL1B	IL1R1_IL1RAP		IL antagonist			KEGG: hsa04060	Secreted Signaling	IL1B - (IL1R1+IL1RAP)
IL1F9_IL1RL2_IL1RAP	IL1F9_IL1RL2_IL1RAP	IL1	IL36G	IL1RL2_IL1RAP					KEGG: hsa04060	Secreted Signaling	IL1F9 - (IL1RL2+IL1RAP)
IL18_IL18R1_IL18RAP	IL18_IL18R1_IL18RAP	IL1	IL18	IL18R1_IL18RAP					KEGG: hsa04060	Secreted Signaling	IL18 - (IL18R1+IL18RAP)
IL33_IL1RL1_IL1RAP	IL33_IL1RL1_IL1RAP	IL1	IL33	IL1RL1_IL1RAP					KEGG: hsa04060	Secreted Signaling	IL33 - (IL1RL1+IL1RAP)
IL17B_IL17RB	IL17B_IL17RB	IL17	IL17B	IL17RB					KEGG: hsa04060	Secreted Signaling	IL17B - IL17RB
IL34_CSF1R	IL34_CSF1R	CSF	IL34	CSF1R					KEGG: hsa04060	Secreted Signaling	IL34 - CSF1R
CSF1_CSF1R	CSF1_CSF1R	CSF	CSF1	CSF1R					KEGG: hsa04060	Secreted Signaling	CSF1 - CSF1R
IL16_CD4	IL16_CD4	IL16	IL16	CD4					KEGG: hsa04060	Secreted Signaling	IL16 - CD4
IFNB1_IFNAR1_IFNAR2	IFNB1_IFNAR1_IFNAR2	IFN-I	IFNB1	IFNAR1_IFNAR2					KEGG: hsa04060	Secreted Signaling	IFNB1 - (IFNAR1+IFNAR2)
LTA_LTB_LTBR	LTA_LTB_LTBR	LT	LTa1b2	LTBR					PMID: 24248355	Secreted Signaling	LTA - (LTB+LTBR)
TNFSF14_LTBR	TNFSF14_LTBR	LIGHT	TNFSF14	LTBR					KEGG: hsa04060	Secreted Signaling	TNFSF14 - LTBR
TNFSF14_TNFRSF14	TNFSF14_TNFRSF14	LIGHT	TNFSF14	TNFRSF14					KEGG: hsa04060	Secreted Signaling	TNFSF14 - TNFRSF14
TNFSF10_TNFRSF10B	TNFSF10_TNFRSF10B	TRAIL	TNFSF10	TNFRSF10A					KEGG: hsa04060	Secreted Signaling	TNFSF10 - TNFRSF10B
TNFSF11_TNFRSF11A	TNFSF11_TNFRSF11A	RANKL	TNFSF11	TNFRSF11A					KEGG: hsa04060	Secreted Signaling	TNFSF11 - TNFRSF11A
TNFSF11_TNFRSF11B	TNFSF11_TNFRSF11B	RANKL	TNFSF11	TNFRSF11B					KEGG: hsa04060	Secreted Signaling	TNFSF11 - TNFRSF11B
TNFSF12_TNFRSF12A	TNFSF12_TNFRSF12A	TWEAK	TNFSF12	TNFRSF12A					KEGG: hsa04060	Secreted Signaling	TNFSF12 - TNFRSF12A
TNFSF4_TNFRSF4	TNFSF4_TNFRSF4	OX40	TNFSF4	TNFRSF4					KEGG: hsa04060	Secreted Signaling	TNFSF4 - TNFRSF4
NAMPT_ITGA5_ITGB1	NAMPT_ITGA5_ITGB1	VISFATIN	NAMPT	ITGA5_ITGB1					PMID: 28490838	Secreted Signaling	NAMPT - (ITGA5+ITGB1)
ANGPTL1_ITGA1_ITGB1	ANGPTL1_ITGA1_ITGB1	ANGPTL	ANGPTL1	ITGA1_ITGB1					PMID: 24478758	Secreted Signaling	ANGPTL1 - (ITGA1+ITGB1)
ANGPTL2_ITGA5_ITGB1	ANGPTL2_ITGA5_ITGB1	ANGPTL	ANGPTL2	ITGA5_ITGB1					PMID: 24478758	Secreted Signaling	ANGPTL2 - (ITGA5+ITGB1)
ANGPTL4_ITGA5_ITGB1	ANGPTL4_ITGA5_ITGB1	ANGPTL	ANGPTL4	ITGA5_ITGB1					PMID: 30049845	Secreted Signaling	ANGPTL4 - (ITGA5+ITGB1)
ANGPTL4_ITGAV_ITGB3	ANGPTL4_ITGAV_ITGB3	ANGPTL	ANGPTL4	ITGAV_ITGB3					PMID: 30049845	Secreted Signaling	ANGPTL4 - (ITGAV+ITGB3)
ANGPTL4_CDH11	ANGPTL4_CDH11	ANGPTL	ANGPTL4	CDH11					PMID: 30049845	Secreted Signaling	ANGPTL4 - CDH11
ANGPTL4_SDC1	ANGPTL4_SDC1	ANGPTL	ANGPTL4	SDC1					PMID: 29017031	Secreted Signaling	ANGPTL4 - SDC1
ANGPTL4_SDC2	ANGPTL4_SDC2	ANGPTL	ANGPTL4	SDC2					PMID: 29017031	Secreted Signaling	ANGPTL4 - SDC2
ANGPTL4_SDC3	ANGPTL4_SDC3	ANGPTL	ANGPTL4	SDC3					PMID: 29017031	Secreted Signaling	ANGPTL4 - SDC3
ANGPTL4_SDC4	ANGPTL4_SDC4	ANGPTL	ANGPTL4	SDC4					PMID: 29017031	Secreted Signaling	ANGPTL4 - SDC4
ANGPT2_ITGA5_ITGB1	ANGPT2_ITGA5_ITGB1	ANGPT	ANGPT2	ITGA5_ITGB1				ANGPT inhibition receptor 2	PMID: 20651738; PMID: 25635707	Secreted Signaling	ANGPT2 - (ITGA5+ITGB1)
MDK_SDC1	MDK_SDC1	MK	MDK	SDC1					PMID: 28356350	Secreted Signaling	MDK - SDC1
MDK_SDC2	MDK_SDC2	MK	MDK	SDC2					PMID: 28356350	Secreted Signaling	MDK - SDC2
MDK_SDC4	MDK_SDC4	MK	MDK	SDC4					PMID: 28356350	Secreted Signaling	MDK - SDC4
MDK_ITGA4_ITGB1	MDK_ITGA4_ITGB1	MK	MDK	ITGA4_ITGB1					PMID: 28356350	Secreted Signaling	MDK - (ITGA4+ITGB1)
MDK_ITGA6_ITGB1	MDK_ITGA6_ITGB1	MK	MDK	ITGA6_ITGB1					PMID: 28356350	Secreted Signaling	MDK - (ITGA6+ITGB1)
MDK_LRP1	MDK_LRP1	MK	MDK	LRP1					PMID: 28356350	Secreted Signaling	MDK - LRP1
MDK_NCL	MDK_NCL	MK	MDK	NCL					PMID: 28356350	Secreted Signaling	MDK - NCL
PTN_SDC1	PTN_SDC1	PTN	PTN	SDC1					PMID: 28356350; PMID: 25620911	Secreted Signaling	PTN - SDC1
PTN_SDC2	PTN_SDC2	PTN	PTN	SDC2					PMID: 28356350; PMID: 25620911	Secreted Signaling	PTN - SDC2
PTN_SDC3	PTN_SDC3	PTN	PTN	SDC3					PMID: 28356350; PMID: 25620911	Secreted Signaling	PTN - SDC3
PTN_SDC4	PTN_SDC4	PTN	PTN	SDC4					PMID: 28356350; PMID: 25620911	Secreted Signaling	PTN - SDC4
PTN_ITGAV_ITGB3	PTN_ITGAV_ITGB3	PTN	PTN	ITGAV_ITGB3					PMID: 28356350; PMID: 25620911	Secreted Signaling	PTN - (ITGAV+ITGB3)
PTN_NCL	PTN_NCL	PTN	PTN	NCL					PMID: 28356350; PMID: 25620911	Secreted Signaling	PTN - NCL
POSTN_ITGAV_ITGB3	POSTN_ITGAV_ITGB3	PERIOSTIN	POSTN	ITGAV_ITGB3					PMID: 26721738	Secreted Signaling	POSTN - (ITGAV+ITGB3)
POSTN_ITGAV_ITGB5	POSTN_ITGAV_ITGB5	PERIOSTIN	POSTN	ITGAV_ITGB5					PMID: 26721738	Secreted Signaling	POSTN - (ITGAV+ITGB5)
AGT_AGTR1B	AGT_AGTR1B	AGT	AGT	AGTR1					KEGG: hsa04080	Secreted Signaling	AGT - AGTR1B
GRP_GRPR	GRP_GRPR	GPR	GRP	GRPR					KEGG: hsa04080	Secreted Signaling	GRP - GRPR
C3_ITGAM_ITGB2	C3_ITGAM_ITGB2	COMPLEMENT	C3	ITGAM_ITGB2					PMID: 16234578	Secreted Signaling	C3 - (ITGAM+ITGB2)
C3_ITGAX_ITGB2	C3_ITGAX_ITGB2	COMPLEMENT	C3	ITGAX_ITGB2					PMID: 16234578	Secreted Signaling	C3 - (ITGAX+ITGB2)
EDN1_EDNRA	EDN1_EDNRA	EDN	EDN1	EDNRA					KEGG: hsa04080	Secreted Signaling	EDN1 - EDNRA
EDN1_EDNRB	EDN1_EDNRB	EDN	EDN1	EDNRB					KEGG: hsa04080	Secreted Signaling	EDN1 - EDNRB
GAL_GALR2	GAL_GALR2	GALANIN	GAL	GALR2					KEGG: hsa04080	Secreted Signaling	GAL - GALR2
NMU_NMUR1	NMU_NMUR1	NMU	NMU	NMUR1					KEGG: hsa04080	Secreted Signaling	NMU - NMUR1
PRSS3_F2RL1	PRSS3_F2RL1	PARs	PRSS3	F2RL1					KEGG: hsa04080	Secreted Signaling	PRSS3 - F2RL1
PRSS3_F2RL3	PRSS3_F2RL3	PARs	PRSS3	F2RL3					KEGG: hsa04080	Secreted Signaling	PRSS3 - F2RL3
PRSS3_PARD3	PRSS3_PARD3	PARs	PRSS3	PARD3					KEGG: hsa04080	Secreted Signaling	PRSS3 - PARD3
PMCH_MCHR1	PMCH_MCHR1	PMCH	PMCH	MCHR1					KEGG: hsa04080	Secreted Signaling	PMCH - MCHR1
NPPB_NPR1	NPPB_NPR1	NPR1	NPPB	NPR1					KEGG: hsa04080; PMID: 29934641	Secreted Signaling	NPPB - NPR1
KITL_KIT	KITL_KIT	KIT	KITLG	KIT					KEGG: hsa04080	Secreted Signaling	KITL - KIT
GCG_GIPR	GCG_GIPR	GIPR	GCG	GIPR					KEGG: hsa04080	Secreted Signaling	GCG - GIPR
CGA_LHCGR	CGA_LHCGR	LHB	CGA	LHCGR					KEGG: hsa04080	Secreted Signaling	CGA - LHCGR
BDNF_NTRK2	BDNF_NTRK2	NT	BDNF	NTRK2			NGFR activation receptor		PMID: 27908981	Secreted Signaling	BDNF - NTRK2
NGF_NTRK1	NGF_NTRK1	NT	NGF	NTRK1			NGFR activation receptor		PMID: 27908981	Secreted Signaling	NGF - NTRK1
HGF_MET	HGF_MET	HGF	HGF	MET					PMID: 28475121	Secreted Signaling	HGF - MET
NTF3_NTRK1	NTF3_NTRK1	NT	NTF3	NTRK1			NGFR activation receptor		PMID: 27908981	Secreted Signaling	NTF3 - NTRK1
NTF3_NTRK2	NTF3_NTRK2	NT	NTF3	NTRK2			NGFR activation receptor		PMID: 27908981	Secreted Signaling	NTF3 - NTRK2
SEMA3A_NRP1_PLXNA1	SEMA3A_NRP1_PLXNA1	SEMA3	SEMA3A	NRP1_PLXNA1					PMID: 27533782	Secreted Signaling	SEMA3A - (NRP1+PLXNA1)
SEMA3A_NRP1_PLXNA2	SEMA3A_NRP1_PLXNA2	SEMA3	SEMA3A	NRP1_PLXNA2					PMID: 27533782	Secreted Signaling	SEMA3A - (NRP1+PLXNA2)
SEMA3A_NRP1_PLXNA3	SEMA3A_NRP1_PLXNA3	SEMA3	SEMA3A	NRP1_PLXNA3					PMID: 27533782	Secreted Signaling	SEMA3A - (NRP1+PLXNA3)
SEMA3A_NRP1_PLXNA4	SEMA3A_NRP1_PLXNA4	SEMA3	SEMA3A	NRP1_PLXNA4					PMID: 27533782	Secreted Signaling	SEMA3A - (NRP1+PLXNA4)
SEMA3B_NRP1_PLXNA1	SEMA3B_NRP1_PLXNA1	SEMA3	SEMA3B	NRP1_PLXNA1					PMID: 27533782	Secreted Signaling	SEMA3B - (NRP1+PLXNA1)
SEMA3B_NRP1_PLXNA2	SEMA3B_NRP1_PLXNA2	SEMA3	SEMA3B	NRP1_PLXNA2					PMID: 27533782	Secreted Signaling	SEMA3B - (NRP1+PLXNA2)
SEMA3B_NRP1_PLXNA3	SEMA3B_NRP1_PLXNA3	SEMA3	SEMA3B	NRP1_PLXNA3					PMID: 27533782	Secreted Signaling	SEMA3B - (NRP1+PLXNA3)
SEMA3B_NRP1_PLXNA4	SEMA3B_NRP1_PLXNA4	SEMA3	SEMA3B	NRP1_PLXNA4					PMID: 27533782	Secreted Signaling	SEMA3B - (NRP1+PLXNA4)
SEMA3C_NRP1_PLXNA1	SEMA3C_NRP1_PLXNA1	SEMA3	SEMA3C	NRP1_PLXNA1					PMID: 27533782	Secreted Signaling	SEMA3C - (NRP1+PLXNA1)
SEMA3C_NRP1_PLXNA2	SEMA3C_NRP1_PLXNA2	SEMA3	SEMA3C	NRP1_PLXNA2					PMID: 27533782	Secreted Signaling	SEMA3C - (NRP1+PLXNA2)
SEMA3C_NRP1_PLXNA3	SEMA3C_NRP1_PLXNA3	SEMA3	SEMA3C	NRP1_PLXNA3					PMID: 27533782	Secreted Signaling	SEMA3C - (NRP1+PLXNA3)
SEMA3C_NRP1_PLXNA4	SEMA3C_NRP1_PLXNA4	SEMA3	SEMA3C	NRP1_PLXNA4					PMID: 27533782	Secreted Signaling	SEMA3C - (NRP1+PLXNA4)
SEMA3D_NRP1_PLXNA1	SEMA3D_NRP1_PLXNA1	SEMA3	SEMA3D	NRP1_PLXNA1					PMID: 27533782	Secreted Signaling	SEMA3D - (NRP1+PLXNA1)
SEMA3D_NRP1_PLXNA2	SEMA3D_NRP1_PLXNA2	SEMA3	SEMA3D	NRP1_PLXNA2					PMID: 27533782	Secreted Signaling	SEMA3D - (NRP1+PLXNA2)
SEMA3D_NRP1_PLXNA3	SEMA3D_NRP1_PLXNA3	SEMA3	SEMA3D	NRP1_PLXNA3					PMID: 27533782	Secreted Signaling	SEMA3D - (NRP1+PLXNA3)
SEMA3D_NRP1_PLXNA4	SEMA3D_NRP1_PLXNA4	SEMA3	SEMA3D	NRP1_PLXNA4					PMID: 27533782	Secreted Signaling	SEMA3D - (NRP1+PLXNA4)
SEMA3B_NRP2_PLXNA1	SEMA3B_NRP2_PLXNA1	SEMA3	SEMA3B	NRP2_PLXNA1					PMID: 27533782	Secreted Signaling	SEMA3B - (NRP2+PLXNA1)
SEMA3B_NRP2_PLXNA2	SEMA3B_NRP2_PLXNA2	SEMA3	SEMA3B	NRP2_PLXNA2					PMID: 27533782	Secreted Signaling	SEMA3B - (NRP2+PLXNA2)
SEMA3B_NRP2_PLXNA3	SEMA3B_NRP2_PLXNA3	SEMA3	SEMA3B	NRP2_PLXNA3					PMID: 27533782	Secreted Signaling	SEMA3B - (NRP2+PLXNA3)
SEMA3B_NRP2_PLXNA4	SEMA3B_NRP2_PLXNA4	SEMA3	SEMA3B	NRP2_PLXNA4					PMID: 27533782	Secreted Signaling	SEMA3B - (NRP2+PLXNA4)
SEMA3C_NRP2_PLXNA1	SEMA3C_NRP2_PLXNA1	SEMA3	SEMA3C	NRP2_PLXNA1					PMID: 27533782	Secreted Signaling	SEMA3C - (NRP2+PLXNA1)
SEMA3C_NRP2_PLXNA2	SEMA3C_NRP2_PLXNA2	SEMA3	SEMA3C	NRP2_PLXNA2					PMID: 27533782	Secreted Signaling	SEMA3C - (NRP2+PLXNA2)
SEMA3C_NRP2_PLXNA3	SEMA3C_NRP2_PLXNA3	SEMA3	SEMA3C	NRP2_PLXNA3					PMID: 27533782	Secreted Signaling	SEMA3C - (NRP2+PLXNA3)
SEMA3C_NRP2_PLXNA4	SEMA3C_NRP2_PLXNA4	SEMA3	SEMA3C	NRP2_PLXNA4					PMID: 27533782	Secreted Signaling	SEMA3C - (NRP2+PLXNA4)
SEMA3D_NRP2_PLXNA1	SEMA3D_NRP2_PLXNA1	SEMA3	SEMA3D	NRP2_PLXNA1					PMID: 27533782	Secreted Signaling	SEMA3D - (NRP2+PLXNA1)
SEMA3D_NRP2_PLXNA2	SEMA3D_NRP2_PLXNA2	SEMA3	SEMA3D	NRP2_PLXNA2					PMID: 27533782	Secreted Signaling	SEMA3D - (NRP2+PLXNA2)
SEMA3D_NRP2_PLXNA3	SEMA3D_NRP2_PLXNA3	SEMA3	SEMA3D	NRP2_PLXNA3					PMID: 27533782	Secreted Signaling	SEMA3D - (NRP2+PLXNA3)
SEMA3D_NRP2_PLXNA4	SEMA3D_NRP2_PLXNA4	SEMA3	SEMA3D	NRP2_PLXNA4					PMID: 27533782	Secreted Signaling	SEMA3D - (NRP2+PLXNA4)
SEMA3G_NRP2_PLXNA1	SEMA3G_NRP2_PLXNA1	SEMA3	SEMA3G	NRP2_PLXNA1					PMID: 27533782	Secreted Signaling	SEMA3G - (NRP2+PLXNA1)
SEMA3G_NRP2_PLXNA2	SEMA3G_NRP2_PLXNA2	SEMA3	SEMA3G	NRP2_PLXNA2					PMID: 27533782	Secreted Signaling	SEMA3G - (NRP2+PLXNA2)
SEMA3G_NRP2_PLXNA3	SEMA3G_NRP2_PLXNA3	SEMA3	SEMA3G	NRP2_PLXNA3					PMID: 27533782	Secreted Signaling	SEMA3G - (NRP2+PLXNA3)
SEMA3G_NRP2_PLXNA4	SEMA3G_NRP2_PLXNA4	SEMA3	SEMA3G	NRP2_PLXNA4					PMID: 27533782	Secreted Signaling	SEMA3G - (NRP2+PLXNA4)
SEMA3C_NRP1_NRP2	SEMA3C_NRP1_NRP2	SEMA3	SEMA3C	NRP1_NRP2					PMID: 27533782	Secreted Signaling	SEMA3C - (NRP1+NRP2)
SEMA3C_PLXND1	SEMA3C_PLXND1	SEMA3	SEMA3C	PLXND1					PMID: 27533782	Secreted Signaling	SEMA3C - PLXND1
SEMA3E_PLXND1	SEMA3E_PLXND1	SEMA3	SEMA3E	PLXND1					PMID: 22325954	Secreted Signaling	SEMA3E - PLXND1
ANXA1_FPR2	ANXA1_FPR2	ANNEXIN	ANXA1	FPR2					PMID: 23230437	Secreted Signaling	ANXA1 - FPR2
ANXA1_FPR1	ANXA1_FPR1	ANNEXIN	ANXA1	FPR1					PMID: 23230437	Secreted Signaling	ANXA1 - FPR1
GAS6_AXL	GAS6_AXL	GAS	GAS6	AXL					PMID: 27801848	Secreted Signaling	GAS6 - AXL
GAS6_MERTK	GAS6_MERTK	GAS	GAS6	MERTK					PMID: 27801848	Secreted Signaling	GAS6 - MERTK
GAS6_TYRO3	GAS6_TYRO3	GAS	GAS6	TYRO3					PMID: 27801848	Secreted Signaling	GAS6 - TYRO3
GRN_SORT1	GRN_SORT1	GRN	GRN	SORT1					PMID: 29555433	Secreted Signaling	GRN - SORT1
OSTN_NPR3	OSTN_NPR3	OSTN	OSTN	NPR3					PMID: 29326144	Secreted Signaling	OSTN - NPR3
PMCH_MERTK	PMCH_MERTK	PMCH	PMCH	MERTK					PMID: 30501104	Secreted Signaling	PMCH - MERTK
PROS1_AXL	PROS1_AXL	PROS	PROS1	AXL					PMID: 29531161	Secreted Signaling	PROS1 - AXL
PROS1_TYRO3	PROS1_TYRO3	PROS	PROS1	TYRO3					PMID: 30501104	Secreted Signaling	PROS1 - TYRO3
PSAP_GPR37	PSAP_GPR37	PSAP	PSAP	GPR37					PMID: 23690594	Secreted Signaling	PSAP - GPR37
RARRES2_GPR1	RARRES2_GPR1	CHEMERIN	RARRES2	GPR1					PMID: 24671882	Secreted Signaling	RARRES2 - GPR1
RARRES2_CMKLR1	RARRES2_CMKLR1	CHEMERIN	RARRES2	CMKLR1					PMID: 24671882	Secreted Signaling	RARRES2 - CMKLR1
SAA1_FPR2	SAA1_FPR2	SAA	SAA1	FPR2					PMID: 22610094	Secreted Signaling	SAA1 - FPR2
BTLA_TNFRSF14	BTLA_TNFRSF14	BTLA	BTLA	TNFRSF14					PMID: 21941365	Secreted Signaling	BTLA - TNFRSF14
LGALS9_CD44	LGALS9_CD44	GALECTIN	LGALS9	CD44					PMID: 25065622	Secreted Signaling	LGALS9 - CD44
